# Supplementary material for: Scenario-based Inventory Modelling for Prospective Life Cycle Assessment of Mineral Raw Materials (SIMPL-Minerals)
Source: Research Square preprint supplement (doi:10.21203/rs.3.rs-8222189/v1), 2025-11-28
Supplement: Supplementary file 1 [file 2712d3933c7c5480afa21262.xlsx]

## Sheet: Title_page
International Journal of Life Cycle Assessment
Scenario-based Inventory Modelling for Prospective Life Cycle Assessment of Mineral Raw Materials (SIMPL-Minerals)
Jonas Klimt (1),*, Robert Istrate (1), Valerio Barbarossa (1), Antoine Beylot (2), Frederic Lai (2), Bernhard Steubing (1)
1 Institute of Environmental Sciences (CML), Leiden University, 2333 CC Leiden, The Netherlands
2 BRGM, F-45060 Orléans, France
* Correspondence: j.b.j.klimt@cml.leidenuniv.nl
Supplementary Information 2
	Sheets	Content
SI2.1	Step A	Step A of the SIMPL-Minerals approach: Inventory, parameter and factor identification
SI2.2	Step B	Step B of the SIMPL approach: Adopt, derive, select distinct assumptions of parameters and factors
SI2.3	Step C	Step C of the SIMPL approach: cross consistency check of assumptions and distinctness based selection of scenarios
SI2.4	Nickel_supply_assumptions	Regional and production pathway supply assumptions
SI2.5	Nickel_demand _model	Data input BEV demand, converted into nickel inflows, split into secondary and primary supply
SI2.6	Battery_chemistry_share	Battery chemistry technology market assumptions
SI2.7	Battery_capacity_stock	Stock of battery capacity from REMIND scenarios
SI2.8	Battery_capacity_flows_NDC	Results from stock driven model, inflow/outflow of battery capacity for NDC scenario
SI2.9	Battery_capacity_flows_2.0	Results from stock driven model, inflow/outflow of battery capacity for 2.0 scenario
SI2.10	Battery_capacity_flows_1.5	Results from stock driven model, inflow/outflow of battery capacity for 1.5 scenario
SI2.11	Nickel_inflow	Inflow of nickel from batter capacity stock model inflow
SI2.12	Nickel_inflow_NDC	Outflow of nickel from flow driven model, outflow of nickel for NDC scenario
SI2.13	Nickel_inflow_2.0	Outflow of nickel from flow driven model, outflow of nickel for 2.0 scenario
SI2.14	Nickel_inflow_1.5	Outflow of nickel from flow driven model, outflow of nickel for 1.5 scenario
SI2.15	Scaling_of_LCIs
SI2.16	Ore_grade
References

## Sheet: SI2.1 - Step A
Step A - A1 Inventory model and parameters, A2 PESTEL, A3 CLD

## Sheet: SI2.2 - Step B
					Current	Low development			Medium development			High development
Step	Stage	Parameter category	Parameter	Description/comment		Develoment over time	2050	Source	Develoment over time	2050	Source	Develoment over time	2050	Source
B1_Adopt assumptions	Market	External parameter/factor	Cumulative primary production [Mt nickel sulfate]	External parameter/factor used as a helper parameter to calculate other parameters	7.5436		58.1868	Nickel_demand_model		143.95	Nickel_demand_model		145.939	Nickel_demand_model
B2_Derive assumptions	Mining, Concentration	01_Deposit characteristics	Ore grade	No distinction between sulfide and laterite ore grade	0.006736	ore grade = -0.041672 + cumulative_demand^0.096607 * (-0.068769)	0.004944	van der Meide (2022), BAU	ore grade = -0.041672 + cumulative_demand^0.096607 * (-0.068769)	0.004472	van der Meide (2022), SD	ore grade = -0.041672 + cumulative_demand^0.096607 * (-0.068769)	0.004472	van der Meide (2022), SD
B2_Derive assumptions	Mining	03_New technology	Mine electrification [% of mines]	This includes all operations on site that are run on fuel (mobile and stationary equipment and machinery). This includes the parameters haul truck fleet mic and other machienry fleet mix.	0	slow push for mine electrification, aligning with SSP2-NDC heavy duty truck electrification scenarios, although beings slightly more ambitious due to the ambitious claims of mining companies, diesel is preferred in the medium-term	0.3	based on Kumar et al. (2020) and Gleeson (2018)	medium electrification, but more ambitious than SSP2-PkBudg1150 electrification of heavy duty trucks, du to ambitious plans of mining companies, hybrids remain a attractive alternativ eoption in the mid-term	0.6	based on Kumar et al. (2020) and Gleeson (2018)	high electrification, strong push to retrofit and exchange older equipment before EoL, aligning with SSP2-PkBudg500 electrification of heavy duty trucks	1	based on Kumar et al. (2020) and Gleeson (2018)
B2_Derive assumptions	Purification, Refining	03_New technology	Electrification of equipment [% of all equipment]	Refers to electrifcation of drying and evaporation processes of RKEF, FS, and HPAL routes as well as heat in the autoclave and hydrogen precipitation in the FS route.	0	slow push for electrification, with little brownfield operations being retrofitted	0.3	assumption interferred from Kumar et al. (2020) and Gleeson (2018)	medium electrification rates with push for retrofitting brownfield operations leading to all brwonfield operations adopting electrification in the long-term	0.6	assumption interfered from Kumar et al. (2020) and Gleeson (2018)	high electrification push with all brownfield operations being retrofitted in the mid-term horizon	1	assumption interfered from Kumar et al. (2020) and Gleeson (2018)
B2_Derive assumptions	Concentration	03_New technology	HPGR adaption [% of all concentration plants]	For HPAL and FS route, HPGR as an alternative to conventional milling	0	comparatively low adoption rates but nevertheless HPGR is a developed technology implemented by 50% of the sector to reduce energy demand and costs	0.5	assumption	medium adoption rates	0.7	assumption	high adoption rates with brownfields being retrofitted	0.9	assumption
B2_Derive assumptions	Concentration	04_Process efficiencies	Recovery efficiency	for sulfide ore (FS route), follows Wright's law with a assumed maximum efficiency of 95%, the assumed learning rate is presented in the respective "development over time" column	0.79	0	0.79	assumption no efficiency increase	0.025	0.806337	assumption using Wright's law: recovery_eff(t) = max_eff - (max_eff - eff(t0)) * (demand(t) / demand(t0)) ^ log (1 - learning_rate, 2)	0.05	0.821498	assumption using Wright's law: recovery_eff(t) = max_eff - (max_eff - eff(t0)) * (demand(t) / demand(t0)) ^ log (1 - learning_rate, 2)
B2_Derive assumptions	Purification	04_Process efficiencies	Recovery efficiency	for FS route, follows Wright's law with a assumed maximum efficiency of 95%, the assumed learning rate is presented in the respective "development over time" column	0.9	0	0.9	assumption no efficiency increase	0.025	0.905105	assumption using Wright's law: recovery_eff(t) = max_eff - (max_eff - eff(t0)) * (demand(t) / demand(t0)) ^ log (1 - learning_rate, 2)	0.05	0.909843	assumption using Wright's law: recovery_eff(t) = max_eff - (max_eff - eff(t0)) * (demand(t) / demand(t0)) ^ log (1 - learning_rate, 2)
B2_Derive assumptions	Purification	04_Process efficiencies	Recovery efficiency	for RKEF route, follows Wright's law with a assumed maximum efficiency of 95%, the assumed learning rate is presented in the respective "development over time" column	0.88	0	0.88	assumption no efficiency increase	0.025	0.887148	assumption using Wright's law: recovery_eff(t) = max_eff - (max_eff - eff(t0)) * (demand(t) / demand(t0)) ^ log (1 - learning_rate, 2)	0.05	0.89378	assumption using Wright's law: recovery_eff(t) = max_eff - (max_eff - eff(t0)) * (demand(t) / demand(t0)) ^ log (1 - learning_rate, 2)
B2_Derive assumptions	Mining, Concentration, Purification, Refining	04_Process efficiencies	Energy efficiency	assumed yearly efficiency increase	nan	no efficiency increase	0	assumption	moderate efficiency increase of 0.1% per year	0.0253023	assumption	high efficiency increase of 0.5% per year	0.132796	assumption
B2_Derive assumptions	Mining, Concentration, Purification, Refining	04_Process efficiencies	Material efficiency	assumed yearly efficiency increase	nan	no efficiency increase	0	assumption	moderate efficiency increase of 0.1% per year	0.0253023	assumption	high efficiency increase of 0.5% per year	0.132796	assumption
B1_Adopt assumptions	Pre-treatment, Purification, Refining	04_Process efficiencies	Recycling efficiency		0.9		0.9	Nell et al. (2024) STEPS scenario		0.94	Nell et al. (2024) SDS scenario		0.98	Nell et al. (2024) 1.5 degree scenario
B2_Derive assumptions	Purification	05_Material inputs	Reductants substitution	adoption rate of hydrogen as a reductant substitution of coal in the RKEF and FS route	0	slow deployment of H2 due to lack of infrastructure	0.1	assumption	medium deployment due to advancing H2 infrastructure and environmental regulations	0.2	assumption	high deployment of H2 due to political push for it	0.3	assumption
B1_Adopt assumptions	Market	02_Market	Secondary production share	Aligned with demand	0.166258		0.782975	Nickel_demand_model		0.825061	Nickel_demand_model		0.862448	Nickel_demand_model
B2_Derive assumptions	Market	02_Market	Primary production type share	for HPAL route in OAS	0.16		0.18	Nickel_supply_assumptions		0.2	Nickel_supply_assumptions		0.25	Nickel_supply_assumptions
B2_Derive assumptions	Market	02_Market	Primary production type share	for HPAL route in CHA	0.55		0.75	Nickel_supply_assumptions		0.75	Nickel_supply_assumptions		0.7	Nickel_supply_assumptions
B2_Derive assumptions	Market	02_Market	Primary production type share	for RKEF route in OAS	0.02		0.01	Nickel_supply_assumptions		0	Nickel_supply_assumptions		0	Nickel_supply_assumptions
B2_Derive assumptions	Market	02_Market	Primary production type share	for RKEF route in CHA	0.25		0.05	Nickel_supply_assumptions		0	Nickel_supply_assumptions		0	Nickel_supply_assumptions
B2_Derive assumptions	Market	02_Market	Primary production type share	for FS in CAZ	0.02		0.01	Nickel_supply_assumptions		0.05	Nickel_supply_assumptions		0.05	Nickel_supply_assumptions
B2_Derive assumptions	Market	02_Market	Secondary production type share	for pyrometallurgical route WORLD	0.4		0.3	Nickel_supply_assumptions		0.2	Nickel_supply_assumptions		0.2	Nickel_supply_assumptions
B2_Derive assumptions	Market	02_Market	Secondary production type share	for hydrometallurgical route WORLD	0.6		0.7	Nickel_supply_assumptions		0.8	Nickel_supply_assumptions		0.8	Nickel_supply_assumptions
B1_Adopt assumptions	Minig, Concentration, Purification, Refining	05_Material inputs, 06_Energy inputs	Background parameters: Chemical decarbonization, Electricity source/mix, Heat source/mix, Fuel source/mix	This implicitly includes adopted assumptions for external parameters/factors about the EV battery demand, environmental policy and legislation and decarbonization	REMIND SSP2-NDC 2025		REMIND SSP2-NDC 2050	premise		REMIND SSP2-PkBudg1150 2050	premise		REMIND SSP2-PkBudg500 2050	premise
B2_Derive assumptions	Market	External parameter/factor	Alternative battery chemistries		see Battery_chemistry_shares

## Sheet: SI2.3 - Step C
C1_Consistency check
	Ore grade, STEPS	Ore grade, SD	Mine electrification, low	Mine electrification, medium	Mine electrification, high	Electrification of equipment, low	Electrification of equipment, medium	Electrification of equipment, high	HPGR, low adoption rate	HPGR, medium adoption rate	HPGR, high adoption rate	Recycling efficiencies, low	Recycling efficiencies, medium	Recycling efficiencies, high	Energy efficiency, no increase	Energy efficiency, moderate increase	Energy efficiency, high increase	Material efficiency, no increase	Material efficiency, moderate increase	Material efficiency, high increase	Supply chain diversification, low	Supply chain diversification, medium	Supply chain diversification, high	HPAL preference over RKEF, medium	HPAL preference over RKEF, high	Background, SSP2-NDC	Background, SSP2-PkBudg1150	Background, SSP2-PkBudg500
Ore grade, STEPS
Ore grade, SD
Mine electrification, low	2	0
Mine electrification, medium	1	2
Mine electrification, high	-1	3
Electrification of equipment, low	1	0	3	0	-2
Electrification of equipment, medium	0	1	0	3	0
Electrification of equipment, high	0	1	-2	0	3
HPGR, low adoption rate	2	0	1	0	0	1	0	0
HPGR, medium adoption rate	1	2	0	1	0	0	1	0
HPGR, high adoption rate	-1	3	0	0	1	0	0	1
Recycling efficiencies, low	0	0	0	0	0	0	0	0	0	0	0
Recycling efficiencies, medium	0	0	0	0	0	0	0	0	0	0	0
Recycling efficiencies, high	0	0	0	0	0	0	0	0	0	0	0
Energy efficiency, no increase	1	1	3	2	1	3	2	1	3	2	1	1	0	0
Energy efficiency, moderate increase	2	3	2	3	2	2	3	2	2	3	2	0	1	0
Energy efficiency, high increase	0	3	1	2	3	1	2	3	1	2	3	0	0	1
Material efficiency, no increase	2	1	0	0	0	0	0	0	0	0	0	1	0	0	1	0	0
Material efficiency, moderate increase	1	2	0	0	0	0	0	0	0	0	0	0	1	0	0	1	0
Material efficiency, high increase	0	3	0	0	0	0	0	0	0	0	0	0	0	1	0	0	1
Supply chain diversification, low	0	0	0	0	0	0	0	0	0	0	0	0	0	0	0	0	0	0	0	0
Supply chain diversification, medium	0	0	0	0	0	0	0	0	0	0	0	0	0	0	0	0	0	0	0	0
Supply chain diversification, high	0	0	0	0	0	0	0	0	0	0	0	0	0	0	0	0	0	0	0	0
HPAL preference over RKEF, medium	0	0	0	0	0	0	0	0	0	0	0	0	0	0	0	0	0	0	0	0	0	0	0
HPAL preference over RKEF, high	0	0	0	0	0	0	0	0	0	0	0	0	0	0	0	0	0	0	0	0	0	0	0
Background, SSP2-NDC	3	-1	3	2	1	3	2	1	3	2	1	3	2	1	3	1	0	3	1	0	3	1	0	3	1
Background, SSP2-PkBudg1150	-1	2	2	3	2	2	3	2	2	3	2	2	3	2	1	3	1	1	3	1	1	3	1	2	2
Background, SSP2-PkBudg500	-3	3	1	2	3	1	2	3	1	2	3	1	2	3	0	1	3	0	1	3	0	1	3	1	3
Novel alternative battery chemistries, low market penetration	2	0	0	0	0	0	0	0	0	0	0	0	0	0	0	0	0	0	0	0	0	0	0	0	0	3	0	-1
Novel alternative battery chemistries, medium market penetration	0	1	0	0	0	0	0	0	0	0	0	0	0	0	0	0	0	0	0	0	0	0	0	0	0	0	3	0
Novel alternative battery chemistries, high market penetration	-1	2	0	0	0	0	0	0	0	0	0	0	0	0	0	0	0	0	0	0	0	0	0	0	0	-3	0	3
C2_Distinctness-based selection of scenarios	Choose consistent combinations of assumptions and mark them by crosses
	NDC	2	1.5
Ore grade, STEPS	x
Ore grade, SD		x	x
Mine electrification, low	x
Mine electrification, medium		x
Mine electrification, high			x
Electrification of equipment, low	x
Electrification of equipment, medium		x
Electrification of equipment, high			x
HPGR, low adoption rate	x
HPGR, medium adoption rate		x
HPGR, high adoption rate			x
Recycling efficiencies, low	x
Recycling efficiencies, medium		x
Recycling efficiencies, high			x
Energy efficiency, no increase	x
Energy efficiency, moderate increase		x
Energy efficiency, high increase			x
Material efficiency, no increase	x
Material efficiency, moderate increase		x
Material efficiency, high increase			x
Supply chain diversification, low	x
Supply chain diversification, medium		x
Supply chain diversification, high			x
HPAL preference over RKEF, medium	x
HPAL preference over RKEF, high		x	x
Background, SSP2-NDC	x
Background, SSP2-PkBudg1150		x
Background, SSP2-PkBudg500			x
Novel alternative battery chemistries, low market penetration	x
Novel alternative battery chemistries, medium market penetration		x
Novel alternative battery chemistries, high market penetration			x

## Sheet: SI2.4 - Nickel_supply
scenario	NDC							2 ºC							1.5 ºC
region	OAS	OAS	CHA	CHA	CAZ	World	World	OAS	OAS	CHA	CHA	CAZ	World	World	OAS	OAS	CHA	CHA	CAZ	World	World
production pathway	HPAL	RKEF	HPAL	RKEF	FS	ReHydro	RePyro	HPAL	RKEF	HPAL	RKEF	FS	ReHydro	RePyro	HPAL	RKEF	HPAL	RKEF	FS	ReHydro	RePyro
	relative primary [%]					relative secondary [%]		relative primary [%]					relative secondary [%]		relative primary [%]					relative secondary [%]
2005	nan	nan	nan	nan	nan	nan	nan	nan	nan	nan	nan	nan	nan	nan	nan	nan	nan	nan	nan	nan	nan
2006	nan	nan	nan	nan	nan	nan	nan	nan	nan	nan	nan	nan	nan	nan	nan	nan	nan	nan	nan	nan	nan
2007	nan	nan	nan	nan	nan	nan	nan	nan	nan	nan	nan	nan	nan	nan	nan	nan	nan	nan	nan	nan	nan
2008	nan	nan	nan	nan	nan	nan	nan	nan	nan	nan	nan	nan	nan	nan	nan	nan	nan	nan	nan	nan	nan
2009	nan	nan	nan	nan	nan	nan	nan	nan	nan	nan	nan	nan	nan	nan	nan	nan	nan	nan	nan	nan	nan
2010	nan	nan	nan	nan	nan	nan	nan	nan	nan	nan	nan	nan	nan	nan	nan	nan	nan	nan	nan	nan	nan
2011	nan	nan	nan	nan	nan	nan	nan	nan	nan	nan	nan	nan	nan	nan	nan	nan	nan	nan	nan	nan	nan
2012	nan	nan	nan	nan	nan	nan	nan	nan	nan	nan	nan	nan	nan	nan	nan	nan	nan	nan	nan	nan	nan
2013	nan	nan	nan	nan	nan	nan	nan	nan	nan	nan	nan	nan	nan	nan	nan	nan	nan	nan	nan	nan	nan
2014	nan	nan	nan	nan	nan	nan	nan	nan	nan	nan	nan	nan	nan	nan	nan	nan	nan	nan	nan	nan	nan
2015	nan	nan	nan	nan	nan	nan	nan	nan	nan	nan	nan	nan	nan	nan	nan	nan	nan	nan	nan	nan	nan
2016	nan	nan	nan	nan	nan	nan	nan	nan	nan	nan	nan	nan	nan	nan	nan	nan	nan	nan	nan	nan	nan
2017	nan	nan	nan	nan	nan	nan	nan	nan	nan	nan	nan	nan	nan	nan	nan	nan	nan	nan	nan	nan	nan
2018	nan	nan	nan	nan	nan	nan	nan	nan	nan	nan	nan	nan	nan	nan	nan	nan	nan	nan	nan	nan	nan
2019	nan	nan	nan	nan	nan	nan	nan	nan	nan	nan	nan	nan	nan	nan	nan	nan	nan	nan	nan	nan	nan
2020	nan	nan	nan	nan	nan	nan	nan	nan	nan	nan	nan	nan	nan	nan	nan	nan	nan	nan	nan	nan	nan
2021	nan	nan	nan	nan	nan	nan	nan	nan	nan	nan	nan	nan	nan	nan	nan	nan	nan	nan	nan	nan	nan
2022	nan	nan	nan	nan	nan	nan	nan	nan	nan	nan	nan	nan	nan	nan	nan	nan	nan	nan	nan	nan	nan
2023	nan	nan	nan	nan	nan	nan	nan	nan	nan	nan	nan	nan	nan	nan	nan	nan	nan	nan	nan	nan	nan
2024	nan	nan	nan	nan	nan	nan	nan	nan	nan	nan	nan	nan	nan	nan	nan	nan	nan	nan	nan	nan	nan
2025	0.16	0.02	0.55	0.25	0.02	0.6	0.4	0.16	0.02	0.55	0.25	0.02	0.6	0.4	0.16	0.02	0.55	0.25	0.02	0.6	0.4
2026	0.1608	0.0196	0.558	0.242	0.0196	0.604	0.396	0.1616	0.0192	0.558	0.24	0.0212	0.608	0.392	0.1636	0.0192	0.556	0.24	0.0212	0.608	0.392
2027	0.1616	0.0192	0.566	0.234	0.0192	0.608	0.392	0.1632	0.0184	0.566	0.23	0.0224	0.616	0.384	0.1672	0.0184	0.562	0.23	0.0224	0.616	0.384
2028	0.1624	0.0188	0.574	0.226	0.0188	0.612	0.388	0.1648	0.0176	0.574	0.22	0.0236	0.624	0.376	0.1708	0.0176	0.568	0.22	0.0236	0.624	0.376
2029	0.1632	0.0184	0.582	0.218	0.0184	0.616	0.384	0.1664	0.0168	0.582	0.21	0.0248	0.632	0.368	0.1744	0.0168	0.574	0.21	0.0248	0.632	0.368
2030	0.164	0.018	0.59	0.21	0.018	0.62	0.38	0.168	0.016	0.59	0.2	0.026	0.64	0.36	0.178	0.016	0.58	0.2	0.026	0.64	0.36
2031	0.1648	0.0176	0.598	0.202	0.0176	0.624	0.376	0.1696	0.0152	0.598	0.19	0.0272	0.648	0.352	0.1816	0.0152	0.586	0.19	0.0272	0.648	0.352
2032	0.1656	0.0172	0.606	0.194	0.0172	0.628	0.372	0.1712	0.0144	0.606	0.18	0.0284	0.656	0.344	0.1852	0.0144	0.592	0.18	0.0284	0.656	0.344
2033	0.1664	0.0168	0.614	0.186	0.0168	0.632	0.368	0.1728	0.0136	0.614	0.17	0.0296	0.664	0.336	0.1888	0.0136	0.598	0.17	0.0296	0.664	0.336
2034	0.1672	0.0164	0.622	0.178	0.0164	0.636	0.364	0.1744	0.0128	0.622	0.16	0.0308	0.672	0.328	0.1924	0.0128	0.604	0.16	0.0308	0.672	0.328
2035	0.168	0.016	0.63	0.17	0.016	0.64	0.36	0.176	0.012	0.63	0.15	0.032	0.68	0.32	0.196	0.012	0.61	0.15	0.032	0.68	0.32
2036	0.1688	0.0156	0.638	0.162	0.0156	0.644	0.356	0.1776	0.0112	0.638	0.14	0.0332	0.688	0.312	0.1996	0.0112	0.616	0.14	0.0332	0.688	0.312
2037	0.1696	0.0152	0.646	0.154	0.0152	0.648	0.352	0.1792	0.0104	0.646	0.13	0.0344	0.696	0.304	0.2032	0.0104	0.622	0.13	0.0344	0.696	0.304
2038	0.1704	0.0148	0.654	0.146	0.0148	0.652	0.348	0.1808	0.0096	0.654	0.12	0.0356	0.704	0.296	0.2068	0.0096	0.628	0.12	0.0356	0.704	0.296
2039	0.1712	0.0144	0.662	0.138	0.0144	0.656	0.344	0.1824	0.0088	0.662	0.11	0.0368	0.712	0.288	0.2104	0.0088	0.634	0.11	0.0368	0.712	0.288
2040	0.172	0.014	0.67	0.13	0.014	0.66	0.34	0.184	0.008	0.67	0.1	0.038	0.72	0.28	0.214	0.008	0.64	0.1	0.038	0.72	0.28
2041	0.1728	0.0136	0.678	0.122	0.0136	0.664	0.336	0.1856	0.0072	0.678	0.09	0.0392	0.728	0.272	0.2176	0.0072	0.646	0.09	0.0392	0.728	0.272
2042	0.1736	0.0132	0.686	0.114	0.0132	0.668	0.332	0.1872	0.0064	0.686	0.08	0.0404	0.736	0.264	0.2212	0.0064	0.652	0.08	0.0404	0.736	0.264
2043	0.1744	0.0128	0.694	0.106	0.0128	0.672	0.328	0.1888	0.0056	0.694	0.07	0.0416	0.744	0.256	0.2248	0.0056	0.658	0.07	0.0416	0.744	0.256
2044	0.1752	0.0124	0.702	0.098	0.0124	0.676	0.324	0.1904	0.0048	0.702	0.06	0.0428	0.752	0.248	0.2284	0.0048	0.664	0.06	0.0428	0.752	0.248
2045	0.176	0.012	0.71	0.09	0.012	0.68	0.32	0.192	0.004	0.71	0.05	0.044	0.76	0.24	0.232	0.004	0.67	0.05	0.044	0.76	0.24
2046	0.1768	0.0116	0.718	0.082	0.0116	0.684	0.316	0.1936	0.0032	0.718	0.04	0.0452	0.768	0.232	0.2356	0.0032	0.676	0.04	0.0452	0.768	0.232
2047	0.1776	0.0112	0.726	0.074	0.0112	0.688	0.312	0.1952	0.0024	0.726	0.03	0.0464	0.776	0.224	0.2392	0.0024	0.682	0.03	0.0464	0.776	0.224
2048	0.1784	0.0108	0.734	0.066	0.0108	0.692	0.308	0.1968	0.0016	0.734	0.02	0.0476	0.784	0.216	0.2428	0.0016	0.688	0.02	0.0476	0.784	0.216
2049	0.1792	0.0104	0.742	0.058	0.0104	0.696	0.304	0.1984	0.0008	0.742	0.01	0.0488	0.792	0.208	0.2464	0.0008	0.694	0.01	0.0488	0.792	0.208
2050	0.18	0.01	0.75	0.05	0.01	0.7	0.3	0.2	0	0.75	0	0.05	0.8	0.2	0.25	0	0.7	0	0.05	0.8	0.2
	absolute [Mt nickel sulfate]
2005	#VALUE!	#VALUE!	#VALUE!	#VALUE!	#VALUE!	#VALUE!	#VALUE!	#VALUE!	#VALUE!	#VALUE!	#VALUE!	#VALUE!	#VALUE!	#VALUE!	#VALUE!	#VALUE!	#VALUE!	#VALUE!	#VALUE!	#VALUE!	#VALUE!
2006	#VALUE!	#VALUE!	#VALUE!	#VALUE!	#VALUE!	#VALUE!	#VALUE!	#VALUE!	#VALUE!	#VALUE!	#VALUE!	#VALUE!	#VALUE!	#VALUE!	#VALUE!	#VALUE!	#VALUE!	#VALUE!	#VALUE!	#VALUE!	#VALUE!
2007	#VALUE!	#VALUE!	#VALUE!	#VALUE!	#VALUE!	#VALUE!	#VALUE!	#VALUE!	#VALUE!	#VALUE!	#VALUE!	#VALUE!	#VALUE!	#VALUE!	#VALUE!	#VALUE!	#VALUE!	#VALUE!	#VALUE!	#VALUE!	#VALUE!
2008	#VALUE!	#VALUE!	#VALUE!	#VALUE!	#VALUE!	#VALUE!	#VALUE!	#VALUE!	#VALUE!	#VALUE!	#VALUE!	#VALUE!	#VALUE!	#VALUE!	#VALUE!	#VALUE!	#VALUE!	#VALUE!	#VALUE!	#VALUE!	#VALUE!
2009	#VALUE!	#VALUE!	#VALUE!	#VALUE!	#VALUE!	#VALUE!	#VALUE!	#VALUE!	#VALUE!	#VALUE!	#VALUE!	#VALUE!	#VALUE!	#VALUE!	#VALUE!	#VALUE!	#VALUE!	#VALUE!	#VALUE!	#VALUE!	#VALUE!
2010	#VALUE!	#VALUE!	#VALUE!	#VALUE!	#VALUE!	#VALUE!	#VALUE!	#VALUE!	#VALUE!	#VALUE!	#VALUE!	#VALUE!	#VALUE!	#VALUE!	#VALUE!	#VALUE!	#VALUE!	#VALUE!	#VALUE!	#VALUE!	#VALUE!
2011	#VALUE!	#VALUE!	#VALUE!	#VALUE!	#VALUE!	#VALUE!	#VALUE!	#VALUE!	#VALUE!	#VALUE!	#VALUE!	#VALUE!	#VALUE!	#VALUE!	#VALUE!	#VALUE!	#VALUE!	#VALUE!	#VALUE!	#VALUE!	#VALUE!
2012	#VALUE!	#VALUE!	#VALUE!	#VALUE!	#VALUE!	#VALUE!	#VALUE!	#VALUE!	#VALUE!	#VALUE!	#VALUE!	#VALUE!	#VALUE!	#VALUE!	#VALUE!	#VALUE!	#VALUE!	#VALUE!	#VALUE!	#VALUE!	#VALUE!
2013	#VALUE!	#VALUE!	#VALUE!	#VALUE!	#VALUE!	#VALUE!	#VALUE!	#VALUE!	#VALUE!	#VALUE!	#VALUE!	#VALUE!	#VALUE!	#VALUE!	#VALUE!	#VALUE!	#VALUE!	#VALUE!	#VALUE!	#VALUE!	#VALUE!
2014	#VALUE!	#VALUE!	#VALUE!	#VALUE!	#VALUE!	#VALUE!	#VALUE!	#VALUE!	#VALUE!	#VALUE!	#VALUE!	#VALUE!	#VALUE!	#VALUE!	#VALUE!	#VALUE!	#VALUE!	#VALUE!	#VALUE!	#VALUE!	#VALUE!
2015	#VALUE!	#VALUE!	#VALUE!	#VALUE!	#VALUE!	#VALUE!	#VALUE!	#VALUE!	#VALUE!	#VALUE!	#VALUE!	#VALUE!	#VALUE!	#VALUE!	#VALUE!	#VALUE!	#VALUE!	#VALUE!	#VALUE!	#VALUE!	#VALUE!
2016	#VALUE!	#VALUE!	#VALUE!	#VALUE!	#VALUE!	#VALUE!	#VALUE!	#VALUE!	#VALUE!	#VALUE!	#VALUE!	#VALUE!	#VALUE!	#VALUE!	#VALUE!	#VALUE!	#VALUE!	#VALUE!	#VALUE!	#VALUE!	#VALUE!
2017	#VALUE!	#VALUE!	#VALUE!	#VALUE!	#VALUE!	#VALUE!	#VALUE!	#VALUE!	#VALUE!	#VALUE!	#VALUE!	#VALUE!	#VALUE!	#VALUE!	#VALUE!	#VALUE!	#VALUE!	#VALUE!	#VALUE!	#VALUE!	#VALUE!
2018	#VALUE!	#VALUE!	#VALUE!	#VALUE!	#VALUE!	#VALUE!	#VALUE!	#VALUE!	#VALUE!	#VALUE!	#VALUE!	#VALUE!	#VALUE!	#VALUE!	#VALUE!	#VALUE!	#VALUE!	#VALUE!	#VALUE!	#VALUE!	#VALUE!
2019	#VALUE!	#VALUE!	#VALUE!	#VALUE!	#VALUE!	#VALUE!	#VALUE!	#VALUE!	#VALUE!	#VALUE!	#VALUE!	#VALUE!	#VALUE!	#VALUE!	#VALUE!	#VALUE!	#VALUE!	#VALUE!	#VALUE!	#VALUE!	#VALUE!
2020	#VALUE!	#VALUE!	#VALUE!	#VALUE!	#VALUE!	#VALUE!	#VALUE!	#VALUE!	#VALUE!	#VALUE!	#VALUE!	#VALUE!	#VALUE!	#VALUE!	#VALUE!	#VALUE!	#VALUE!	#VALUE!	#VALUE!	#VALUE!	#VALUE!
2021	#VALUE!	#VALUE!	#VALUE!	#VALUE!	#VALUE!	#VALUE!	#VALUE!	#VALUE!	#VALUE!	#VALUE!	#VALUE!	#VALUE!	#VALUE!	#VALUE!	#VALUE!	#VALUE!	#VALUE!	#VALUE!	#VALUE!	#VALUE!	#VALUE!
2022	#VALUE!	#VALUE!	#VALUE!	#VALUE!	#VALUE!	#VALUE!	#VALUE!	#VALUE!	#VALUE!	#VALUE!	#VALUE!	#VALUE!	#VALUE!	#VALUE!	#VALUE!	#VALUE!	#VALUE!	#VALUE!	#VALUE!	#VALUE!	#VALUE!
2023	#VALUE!	#VALUE!	#VALUE!	#VALUE!	#VALUE!	#VALUE!	#VALUE!	#VALUE!	#VALUE!	#VALUE!	#VALUE!	#VALUE!	#VALUE!	#VALUE!	#VALUE!	#VALUE!	#VALUE!	#VALUE!	#VALUE!	#VALUE!	#VALUE!
2024	#VALUE!	#VALUE!	#VALUE!	#VALUE!	#VALUE!	#VALUE!	#VALUE!	#VALUE!	#VALUE!	#VALUE!	#VALUE!	#VALUE!	#VALUE!	#VALUE!	#VALUE!	#VALUE!	#VALUE!	#VALUE!	#VALUE!	#VALUE!	#VALUE!
2025	0.244488	0.030561	0.840428	0.382013	0.030561	0.182827	0.121885	0.253069	0.0316337	0.869926	0.395421	0.0316337	0.182827	0.121885	0.253069	0.0316337	0.869926	0.395421	0.0316337	0.182827	0.121885
2026	0.290981	0.0354678	1.00975	0.437919	0.0354678	0.245393	0.160887	0.737515	0.0876255	2.54662	1.09532	0.0967532	0.24767	0.159682	0.598899	0.0702864	2.03538	0.87858	0.0776079	0.24811	0.159965
2027	0.332877	0.0395497	1.16589	0.482012	0.0395497	0.322225	0.20775	0.962619	0.108531	3.3385	1.35663	0.132124	0.339544	0.211664	0.799317	0.0879631	2.6867	1.09954	0.107086	0.337097	0.210138
2028	0.368765	0.0426896	1.3034	0.513183	0.0426896	0.414382	0.262713	1.12369	0.120006	3.91383	1.50008	0.160917	0.484393	0.291878	0.984403	0.101437	3.27366	1.26797	0.136018	0.468412	0.282248
2029	0.398742	0.0449562	1.42198	0.532633	0.0449562	0.522477	0.3257	1.21872	0.123044	4.2626	1.53805	0.181637	0.700111	0.40766	1.15282	0.111051	3.79425	1.38814	0.163933	0.657003	0.382559
2030	0.422782	0.0464029	1.52098	0.541367	0.0464029	0.646541	0.396267	1.24532	0.118602	4.37344	1.48252	0.192728	0.997144	0.560894	1.30295	0.117119	4.24555	1.46398	0.190318	0.914886	0.514624
2031	0.440431	0.0470363	1.59816	0.539848	0.0470363	0.785995	0.473613	1.21462	0.108857	4.28267	1.36071	0.194797	1.37682	0.747901	1.43056	0.119739	4.61625	1.49674	0.21427	1.25011	0.679072
2032	0.450159	0.0467556	1.64732	0.52736	0.0467556	0.939644	0.556605	1.18027	0.0992754	4.17784	1.24094	0.195793	1.83078	0.960045	1.52393	0.118492	4.87132	1.48114	0.233692	1.66598	0.873623
2033	0.45169	0.0456033	1.66669	0.504894	0.0456033	1.10566	0.643804	1.15554	0.0909451	4.1059	1.13681	0.197939	2.34329	1.18576	1.57764	0.113643	4.99697	1.42054	0.247342	2.16057	1.0933
2034	0.445235	0.0436714	1.65632	0.473994	0.0436714	1.2816	0.733496	1.13988	0.0836606	4.06538	1.04576	0.201308	2.89562	1.41334	1.58847	0.105678	4.98666	1.32097	0.254287	2.72667	1.33087
2035	0.43111	0.0410581	1.61666	0.436242	0.0410581	1.46448	0.823771	1.13285	0.0772395	4.05508	0.965494	0.205972	3.46956	1.63273	1.55319	0.0950931	4.8339	1.18866	0.253582	3.35231	1.57756
2036	0.41019	0.0379085	1.55036	0.393666	0.0379085	1.65094	0.912631	1.1313	0.0713431	4.06401	0.891788	0.211481	4.04994	1.8366	1.47808	0.0829384	4.56161	1.03673	0.245853	4.02189	1.82388
2037	0.384781	0.0344851	1.46562	0.349389	0.0344851	1.83741	0.998099	1.12329	0.0651909	4.04936	0.814886	0.215631	4.62628	2.02067	1.39914	0.0716098	4.28282	0.895122	0.236863	4.71737	2.06046
2038	0.355708	0.0308948	1.36522	0.304773	0.0308948	2.02037	1.07835	1.10554	0.0587013	3.99902	0.733766	0.217684	5.1929	2.18338	1.32587	0.0615492	4.02634	0.769364	0.228245	5.42067	2.27915
2039	0.323361	0.0271986	1.25038	0.260653	0.0271986	2.19655	1.15185	1.07782	0.0519999	3.91181	0.649999	0.217454	5.74792	2.325	1.2586	0.0526412	3.79256	0.658015	0.220136	6.11633	2.47402
2040	0.288153	0.0234543	1.12246	0.21779	0.0234543	2.36309	1.21735	1.04372	0.0453789	3.80049	0.567237	0.21555	6.29183	2.44682	1.20248	0.0449526	3.5962	0.561907	0.213525	6.79292	2.64169
2041	0.285853	0.0224977	1.12158	0.201818	0.0224977	2.51759	1.27396	0.991401	0.0384595	3.6216	0.480744	0.209391	6.82604	2.55039	1.13984	0.0377152	3.38389	0.47144	0.205338	7.44351	2.78109
2042	0.285069	0.0216758	1.12648	0.1872	0.0216758	2.65897	1.32153	0.942226	0.0322129	3.45282	0.402661	0.203344	7.35139	2.63691	1.08249	0.0313199	3.19071	0.391499	0.197707	8.06516	2.89294
2043	0.285416	0.020948	1.13577	0.173475	0.020948	2.78827	1.36094	0.888428	0.0263517	3.26573	0.329396	0.195755	7.86735	2.70704	1.01693	0.0253328	2.97661	0.31666	0.188187	8.65776	2.97901
2044	0.286052	0.0202457	1.14617	0.160006	0.0202457	2.90746	1.39352	0.836394	0.0210856	3.08376	0.263569	0.188013	8.37228	2.76107	0.951374	0.0199938	2.76581	0.249923	0.178278	9.22307	3.04165
2045	0.286082	0.0195056	1.15408	0.146292	0.0195056	3.01901	1.42071	0.786467	0.0163847	2.90829	0.204809	0.180232	8.86363	2.79904	0.886507	0.0152846	2.56017	0.191057	0.168131	9.76344	3.08319
2046	0.284625	0.0186745	1.15589	0.132009	0.0186745	3.1254	1.4439	0.738992	0.0122147	2.74068	0.152684	0.172533	9.33859	2.82103	0.822993	0.0111782	2.36139	0.139727	0.157892	10.2813	3.1058
2047	0.280929	0.0177162	1.14839	0.117054	0.0177162	3.22878	1.46422	0.694339	0.00853696	2.58243	0.106712	0.165048	9.79476	2.82735	0.761484	0.00764031	2.17112	0.0955039	0.147713	10.7785	3.11132
2048	0.274429	0.0166134	1.1291	0.101527	0.0166134	3.33067	1.48244	0.652818	0.00530746	2.4348	0.0663433	0.157897	10.2305	2.81861	0.702544	0.00462962	1.99073	0.0578702	0.137731	11.2566	3.1013
2049	0.264753	0.0153651	1.09624	0.0856902	0.0153651	3.43181	1.49895	0.614719	0.00247871	2.299	0.0309838	0.151201	10.6452	2.79571	0.646689	0.00209964	1.82144	0.0262455	0.128078	11.7164	3.07703
2050	0.251754	0.0139863	1.04897	0.0699316	0.0139863	3.53214	1.51378	0.585168	0	2.19438	0	0.146292	11.0393	2.75982	0.605986	0	1.69676	0	0.121197	12.1585	3.03962
Narrative	2025 primary supply values are based on Fraser et al. (2021) and adapted to have a simplified market representation using the defined geographies and technological production pathways. In the NDC scenario China increases is dominance as global nickel sulfate supplier with significant shares coming from OAS (predominantly ID). RKEF is slowly phased out and HPAL dominates technological production p…							2025 primary supply values are based on Fraser et al. (2021) and adapted to have a simplified market representation using the defined geographies and technological production pathways. A more ambitious climate target scenario leads to the complete phase out of RKEF plants for nickel sulfate production, as lower energy demand of HPAL routes is preferred. As nickel sulfate demand increases drastica…							2025 primary supply values are based on Fraser et al. (2021) and adapted to have a simplified market representation using the defined geographies and technological production pathways. The most ambitious climate scenario leads to the highest demand of all three scenarios, resulting in high concerns of supply chain diversification. OAS is able to significantly increase their supply shares, while C…
Graph
	for figure

## Sheet: SI2.5 - Nickel_demand_model
scenario	NDC	2 ºC	1.5 ºC		NDC	2 ºC	1.5 ºC		NDC	2 ºC	1.5 ºC		NDC	2 ºC	1.5 ºC		NDC	2 ºC	1.5 ºC		NDC	2 ºC	1.5 ºC		NDC	2 ºC	1.5 ºC		NDC	2 ºC	1.5 ºC		NDC	2 ºC	1.5 ºC		NDC	2 ºC	1.5 ºC
variable	BEV demand [bn pkm/yr]				batter capacity demand [kWh/yr] (= stock)				inflow battery capacity [kWh/yr]				inflow nickel sulfate [Mt/yr]				outflow nickel sulfate [Mt/yr]				Collection rate [%]				Recycling efficiency				Secondary supply nickel sulfate [Mt]				Primary supply nickel sulfate [Mt]				Secondary supply share [%]
source	REMIND (SSP2-NDC)	REMIND (SSP2-PkBudg1150)	REMIND (SSP2-PkBudg500)		0.0028	kWh/pkm	IEA (2023). Batteries and Secure Energy Transition.		Batter_capacity_flows_NDC	Batter_capacity_flows_2.0	Batter_capacity_flows_1.5		Battery_chemistry_shares	Battery_chemistry_shares	Battery_chemistry_shares		Nickel_outflow_NDC	Nickel_outflow_2.0	Nickel_outflow_1.5		Assumption				Assumption				Calculated				Calculated				Calculated
description	BEV (ldv) pkm demand from REMIND every 5 years consider. This does not include PHEV. Cubic spline interpolation in between data points was used. All data before 2025 was taken from the SSP2-NDC projection. All data from 2030 onwards is scenario specific. Source: The data was taken from the REMIND output files used in premise 2.0.0 from the variable "ES|Transport|Pass|Road|LDV|BEV". The cubic spin…				BEV pkm translated into battery kWh capacity demanded use IEA factor of 2.8 Wh/pkm for an average sized LDV.				Inflow modeled via stock driven S&F model (see tabs: batter_capacity_stock, battery_capacity_flow_NDC/2.0/1.5				Nickel sulfate inflow in respective year calcualted by multiplying battery capacity inflow with nickel concentration (see Battery_chemsitry_shares)				Nickel sulfate outflow from flow driven S&F model (see tabs: Nickel_inflow, Nickel_outflow_ND/2.0/1.5)				Collection assumed to occur in the same year as outflow from stock				Recycling assumed to occur in the same year as outflow from stock
2005	83.94	83.94	83.94		235032000	235032000	235032000		235032000	235032000	235032000		0.389971	0.389971	0.389971		0	0	0		1	1	1		0.9	0.9	0.9		0	0	0		0.389971	0.389971	0.389971		0	0	0
2006	70.89	70.89	70.89		198492000	198492000	198492000		-3.48371e+07	-3.48371e+07	-3.48371e+07		-0.0578026	-0.0578026	-0.0578026		0.00282543	0.00282543	0.00282543		1	1	1		0.9	0.9	0.9		0.00254289	0.00254289	0.00254289		-0.0603455	-0.0603455	-0.0603455		-0.0439926	-0.0439926	-0.0439926
2007	67.89	67.89	67.89		190092000	190092000	190092000		-2.25619e+06	-2.25619e+06	-2.25619e+06		-0.00374353	-0.00374353	-0.00374353		0.0101939	0.0101939	0.0101939		1	1	1		0.9	0.9	0.9		0.00917455	0.00917455	0.00917455		-0.0129181	-0.0129181	-0.0129181		-2.45078	-2.45078	-2.45078
2008	72.79	72.79	72.79		2.03812e+08	2.03812e+08	2.03812e+08		2.446e+07	2.446e+07	2.446e+07		0.0405846	0.0405846	0.0405846		0.0178201	0.0178201	0.0178201		1	1	1		0.9	0.9	0.9		0.0160381	0.0160381	0.0160381		0.0245466	0.0245466	0.0245466		0.395176	0.395176	0.395176
2009	83.45	83.45	83.45		233660000	233660000	233660000		4.49928e+07	4.49928e+07	4.49928e+07		0.0746531	0.0746531	0.0746531		0.0251286	0.0251286	0.0251286		1	1	1		0.9	0.9	0.9		0.0226157	0.0226157	0.0226157		0.0520374	0.0520374	0.0520374		0.302944	0.302944	0.302944
2010	97.71	97.71	97.71		273588000	273588000	273588000		5.92657e+07	5.92657e+07	5.92657e+07		0.0983351	0.0983351	0.0983351		0.0320856	0.0320856	0.0320856		1	1	1		0.9	0.9	0.9		0.0288771	0.0288771	0.0288771		0.069458	0.069458	0.069458		0.29366	0.29366	0.29366
2011	113.44	113.44	113.44		3.17632e+08	3.17632e+08	3.17632e+08		6.74356e+07	6.74356e+07	6.74356e+07		0.111891	0.111891	0.111891		0.0388118	0.0388118	0.0388118		1	1	1		0.9	0.9	0.9		0.0349306	0.0349306	0.0349306		0.07696	0.07696	0.07696		0.312185	0.312185	0.312185
2012	128.5	128.5	128.5		359800000	359800000	359800000		6.95727e+07	6.95727e+07	6.95727e+07		0.115437	0.115437	0.115437		0.0454705	0.0454705	0.0454705		1	1	1		0.9	0.9	0.9		0.0409235	0.0409235	0.0409235		0.0745132	0.0745132	0.0745132		0.35451	0.35451	0.35451
2013	140.74	140.74	140.74		3.94072e+08	3.94072e+08	3.94072e+08		6.57239e+07	6.57239e+07	6.57239e+07		0.109051	0.109051	0.109051		0.0521857	0.0521857	0.0521857		1	1	1		0.9	0.9	0.9		0.0469671	0.0469671	0.0469671		0.0620835	0.0620835	0.0620835		0.430691	0.430691	0.430691
2014	148.02	148.02	148.02		4.14456e+08	4.14456e+08	4.14456e+08		5.5916e+07	5.5916e+07	5.5916e+07		0.0927771	0.0927771	0.0927771		0.0589555	0.0589555	0.0589555		1	1	1		0.9	0.9	0.9		0.05306	0.05306	0.05306		0.0397172	0.0397172	0.0397172		0.571908	0.571908	0.571908
2015	148.19	148.19	148.19		4.14932e+08	4.14932e+08	4.14932e+08		3.99953e+07	3.99953e+07	3.99953e+07		0.0663612	0.0663612	0.0663612		0.0655714	0.0655714	0.0655714		1	1	1		0.9	0.9	0.9		0.0590143	0.0590143	0.0590143		0.00734693	0.00734693	0.00734693		0.889289	0.889289	0.889289
2016	142.44	142.44	142.44		3.98832e+08	3.98832e+08	3.98832e+08		2.70277e+07	2.70277e+07	2.70277e+07		0.044845	0.044845	0.044845		0.0715585	0.0715585	0.0715585		1	1	1		0.9	0.9	0.9		0.0644027	0.0644027	0.0644027		-0.0195576	-0.0195576	-0.0195576		1.43612	1.43612	1.43612
2017	145.24	145.24	145.24		4.06672e+08	4.06672e+08	4.06672e+08		5.38053e+07	5.38053e+07	5.38053e+07		0.0892751	0.0892751	0.0892751		0.0762667	0.0762667	0.0762667		1	1	1		0.9	0.9	0.9		0.0686401	0.0686401	0.0686401		0.020635	0.020635	0.020635		0.768861	0.768861	0.768861
2018	174.39	174.39	174.39		4.88292e+08	4.88292e+08	4.88292e+08		1.29557e+08	1.29557e+08	1.29557e+08		0.214965	0.214965	0.214965		0.0795388	0.0795388	0.0795388		1	1	1		0.9	0.9	0.9		0.0715849	0.0715849	0.0715849		0.14338	0.14338	0.14338		0.333008	0.333008	0.333008
2019	247.7	247.7	247.7		693560000	693560000	693560000		2.5512e+08	2.5512e+08	2.5512e+08		0.447565	0.447565	0.447565		0.0827159	0.0827159	0.0827159		1	1	1		0.9	0.9	0.9		0.0744443	0.0744443	0.0744443		0.373121	0.373121	0.373121		0.166332	0.166332	0.166332
2020	382.96	382.96	382.96		1.07229e+09	1.07229e+09	1.07229e+09		4.32422e+08	4.32422e+08	4.32422e+08		0.741353	0.741353	0.741353		0.0892662	0.0892662	0.0892662		1	1	1		0.9	0.9	0.9		0.0803396	0.0803396	0.0803396		0.661013	0.661013	0.661013		0.108369	0.108369	0.108369
2021	597.13	597.13	597.13		1671964000	1671964000	1671964000		6.62339e+08	6.62339e+08	6.62339e+08		0.839518	0.839518	0.839518		0.104805	0.104805	0.104805		1	1	1		0.9	0.9	0.9		0.0943245	0.0943245	0.0943245		0.745194	0.745194	0.745194		0.112356	0.112356	0.112356
2022	903.83	903.83	903.83		2530724000	2530724000	2530724000		9.3982e+08	9.3982e+08	9.3982e+08		1.0481	1.0481	1.0481		0.134475	0.134475	0.134475		1	1	1		0.9	0.9	0.9		0.121028	0.121028	0.121028		0.927074	0.927074	0.927074		0.115473	0.115473	0.115473
2023	1315.81	1315.81	1315.81		3684268000	3684268000	3684268000		1.26754e+09	1.26754e+09	1.26754e+09		1.35005	1.35005	1.35005		0.181298	0.181298	0.181298		1	1	1		0.9	0.9	0.9		0.163169	0.163169	0.163169		1.18689	1.18689	1.18689		0.120861	0.120861	0.120861
2024	1845.85	1845.85	1845.85		5168380000	5168380000	5168380000		1.6511e+09	1.6511e+09	1.6511e+09		1.47822	1.47822	1.47822		0.248646	0.248646	0.248646		1	1	1		0.9	0.9	0.9		0.223781	0.223781	0.223781		1.25443	1.25443	1.25443		0.151386	0.151386	0.151386
2025	2506.72	2506.72	2506.72		7.01882e+09	7.01882e+09	7.01882e+09		2.09608e+09	2.09608e+09	2.09608e+09		1.83276	1.8864	1.8864		0.338569	0.338569	0.338569		1	1	1		0.9	0.9	0.9		0.304712	0.304712	0.304712		1.52805	1.58168	1.58168		0.166258	0.161531	0.161531
2026	3307.04	4349.06	3993.44		9259712000	1.21774e+10	11181632000		2.59634e+09	5.51399e+09	4.51826e+09		2.21586	4.97118	4.06882		0.451421	0.45181	0.45181		1	1	1		0.9	0.9016	0.9032		0.406279	0.407352	0.408075		1.80958	4.56383	3.66075		0.18335	0.0819427	0.100293
2027	4238.94	6712.85	5921.02		1.1869e+10	18795980000	1.65789e+10		3.11078e+09	7.14121e+09	5.91261e+09		2.58985	6.44961	5.32784		0.588861	0.610283	0.603745		1	1	1		0.9	0.9032	0.9064		0.529975	0.551208	0.547235		2.05988	5.8984	4.7806		0.204635	0.0854638	0.102712
2028	5290.4	9426.37	8229.61		14813120000	26393836000	23042908000		3.632e+09	8.39437e+09	7.22456e+09		2.94782	7.5948	6.51414		0.752328	0.857948	0.825263		1	1	1		0.9	0.9048	0.9096		0.677095	0.776271	0.75066		2.27072	6.81853	5.76348		0.229694	0.102211	0.115235
2029	6449.42	12317.9	10859.4		18058376000	34490064000	3.04062e+10		4.16265e+09	9.30311e+09	8.47869e+09		3.29145	8.43183	7.64976		0.942419	1.22217	1.13887		1	1	1		0.9	0.9064	0.9128		0.848177	1.10777	1.03956		2.44327	7.32406	6.61019		0.257691	0.13138	0.135895
2030	7703.98	15215.7	13750.4		21571144000	42603848000	38501204000		4.70354e+09	9.88022e+09	9.69142e+09		3.62075	8.97065	8.74943		1.15868	1.7159	1.5606		1	1	1		0.9	0.908	0.916		1.04281	1.55804	1.42951		2.57794	7.41261	7.31992		0.288009	0.173682	0.163383
2031	9040.95	17980.2	16837.9		2.53147e+10	5.03446e+10	47146148000		5.2507e+09	1.021e+10	1.08557e+10		3.93212	9.28637	9.80674		1.39956	2.33588	2.09876		1	1	1		0.9	0.9096	0.9192		1.25961	2.12472	1.92918		2.67252	7.16165	7.87756		0.320338	0.2288	0.19672
2032	10442.8	20601.1	20036.7		29239896000	57682968000	56102620000		5.7896e+09	1.06296e+10	1.19125e+10		4.2146	9.68495	10.7682		1.6625	3.06281	2.75325		1	1	1		0.9	0.9112	0.9224		1.49625	2.79083	2.5396		2.71835	6.89413	8.22858		0.355016	0.288161	0.235843
2033	11890.9	23099.8	23256.4		33294632000	64679580000	65117976000		6.31354e+09	1.1193e+10	1.28358e+10		4.46395	10.2162	11.61		1.94385	3.86618	3.51543		1	1	1		0.9	0.9128	0.9256		1.74947	3.52905	3.25388		2.71448	6.68714	8.35614		0.39191	0.345437	0.280265
2034	13366.7	25498.3	26407		37426676000	71395296000	73939572000		6.81796e+09	1.18612e+10	1.36051e+10		4.67799	10.8449	12.3136		2.239	4.71233	4.36858		1	1	1		0.9	0.9144	0.9288		2.0151	4.30896	4.05754		2.66289	6.53598	8.25606		0.430762	0.397324	0.329517
2035	14851.4	27818.2	29398.1		41583892000	7.78909e+10	82314792000		7.29751e+09	1.25982e+10	1.41936e+10		4.85438	11.5389	12.8543		2.5425	5.57018	5.28957		1	1	1		0.9	0.916	0.932		2.28825	5.10229	4.92987		2.56613	6.43663	7.92443		0.471379	0.442181	0.383519
2036	16328	30074.7	32158.3		45718400000	84209244000	90043380000		7.7505e+09	1.33583e+10	1.46224e+10		4.9936	12.2565	13.251		2.84841	6.41515	6.25082		1	1	1		0.9	0.9176	0.9352		2.56357	5.88654	5.84576		2.43003	6.36992	7.40521		0.513371	0.480281	0.441157
2037	17785.6	32257.7	34690.9		49799708000	9.03216e+10	97134464000		8.18807e+09	1.40519e+10	1.50681e+10		5.10427	12.9153	13.6634		3.15057	7.23123	7.22275		1	1	1		0.9	0.9192	0.9384		2.83551	6.64695	6.77783		2.26876	6.26835	6.88556		0.555518	0.514657	0.496058
2038	19214.9	34350.4	37017.7		5.38016e+10	96181176000	103649560000		8.60836e+09	1.46529e+10	1.55522e+10		5.18621	13.491	14.1112		3.44302	8.01072	8.17737		1	1	1		0.9	0.9208	0.9416		3.09872	7.37627	7.69982		2.08749	6.11472	6.41137		0.597493	0.546756	0.545653
2039	20606.4	36336.2	39160.8		57698032000	101741332000	109650156000		9.00563e+09	1.51599e+10	1.60503e+10		5.23718	13.982	14.5723		3.72044	8.75209	9.09224		1	1	1		0.9	0.9224	0.9448		3.34839	8.07292	8.59035		1.88879	5.90908	5.98195		0.63935	0.57738	0.589498
2040	21951	38198.3	41142.1		61462716000	1.06955e+11	1.15198e+11		9.37472e+09	1.55759e+10	1.65463e+10		5.25574	14.411	15.0537		3.97826	9.45742	9.95212		1	1	1		0.9	0.924	0.948		3.58044	8.73866	9.43461		1.67531	5.67237	5.61907		0.681243	0.606387	0.626731
2041	23240	39924.3	42981.2		6.50721e+10	111788180000	120347248000		9.71371e+09	1.59169e+10	1.70251e+10		5.44579	14.718	15.4628		4.21283	10.1301	10.7492		1	1	1		0.9	0.9256	0.9512		3.79155	9.37643	10.2246		1.65424	5.3416	5.23822		0.696235	0.637071	0.661238
2042	24469	41518.3	44688.4		68513088000	1.16251e+11	125127408000		1.00291e+10	1.62324e+10	1.74593e+10		5.6226	15.0216	15.8518		4.42278	10.7725	11.4817		1	1	1		0.9	0.9272	0.9544		3.9805	9.9883	10.9581		1.6421	5.03326	4.89373		0.707946	0.664931	0.691283
2043	25634	42988.4	46271.6		71775144000	120367632000	1.2956e+11		1.03201e+10	1.65356e+10	1.78457e+10		5.78577	15.2801	16.1605		4.61023	11.385	12.152		1	1	1		0.9	0.9288	0.9576		4.14921	10.5744	11.6368		1.63656	4.70566	4.52372		0.71714	0.692039	0.720075
2044	26731.3	44343	47738.7		74847696000	124160484000	1.33668e+11		1.0584e+10	1.68264e+10	1.8191e+10		5.93369	15.5262	16.4301		4.77886	11.9662	12.7651		1	1	1		0.9	0.9304	0.9608		4.30098	11.1334	12.2647		1.63272	4.39282	4.16538		0.72484	0.71707	0.746479
2045	27757.2	45590.3	49097.6		7.77203e+10	127652896000	1.37473e+11		1.08185e+10	1.71033e+10	1.85026e+10		6.06518	15.7588	16.6678		4.93302	12.5136	13.3264		1	1	1		0.9	0.932	0.964		4.43972	11.6627	12.8466		1.62547	4.09618	3.82115		0.732001	0.740071	0.770746
2046	28708	46738.5	50356.3		80382316000	1.30868e+11	140997668000		1.10219e+10	1.7365e+10	1.87878e+10		6.17917	15.9767	16.8802		5.077	13.0244	13.841		1	1	1		0.9	0.9336	0.9672		4.5693	12.1596	13.3871		1.60987	3.81711	3.49318		0.739468	0.761083	0.793061
2047	29579.7	47796	51522.7		82823272000	133828688000	144263448000		1.11924e+10	1.76107e+10	1.90528e+10		6.27481	16.1792	17.0733		5.21444	13.4967	14.3135		1	1	1		0.9	0.9352	0.9704		4.693	12.6221	13.8898		1.58181	3.55707	3.18346		0.747911	0.780145	0.813541
2048	30368.8	48770.8	52604.6		85032668000	1.36558e+11	147292796000		1.1329e+10	1.78403e+10	1.93026e+10		6.35139	16.3663	17.2514		5.3479	13.9295	14.7472		1	1	1		0.9	0.9368	0.9736		4.81311	13.0491	14.3579		1.53828	3.31716	2.89351		0.757804	0.797317	0.832274
2049	31071.4	49671.4	53610		86999920000	139079836000	150107944000		1.14303e+10	1.80553e+10	1.95407e+10		6.40818	16.5393	17.4179		5.47862	14.3232	15.1448		1	1	1		0.9	0.9384	0.9768		4.93076	13.4409	14.7934		1.47742	3.09838	2.62455		0.769448	0.812666	0.849319
2050	31683.8	50505.9	54546.8		88714528000	141416408000	152730984000		1.14952e+10	1.82579e+10	1.97696e+10		6.44455	16.7249	17.6221		5.60658	14.6799	15.5083		1	1	1		0.9	0.94	0.98		5.04592	13.7991	15.1981		1.39863	2.92584	2.42394		0.782975	0.825061	0.862448
Relative increase (2050 to 2025)	12.6395	20.1482	21.7602										3.51631	8.86608	9.34165
Conversion to Ni equivalent [Mt]													1.4178	3.67949	3.87685		1.23345	3.22958	3.41182										1.1101	3.0358	3.34358		0.307699	0.643685	0.533267
									83.94	83.94	83.94		86.69	86.69	86.69		-2.75	-2.75	-2.75
									70.89	70.89	70.89		89.44	89.44	89.44		-18.55	-18.55	-18.55
									67.89	67.89	67.89		92.2	92.2	92.2		-24.31	-24.31	-24.31
									72.79	72.79	72.79		94.95	94.95	94.95		-22.16	-22.16	-22.16
									83.45	83.45	83.45		97.71	97.71	97.71		-14.26	-14.26	-14.26
									97.71	97.71	97.71		97.71	97.71	97.71		0	0	0
									113.44	113.44	113.44		113.44	113.44	113.44		0	0	0
									128.5	128.5	128.5		128.5	128.5	128.5		0	0	0
									140.74	140.74	140.74		140.74	140.74	140.74		0	0	0
									148.02	148.02	148.02		148.02	148.02	148.02		0	0	0
									148.19	148.19	148.19		148.19	148.19	148.19		0	0	0
									142.44	142.44	142.44		142.44	142.44	142.44		0	0	0
									145.24	145.24	145.24		145.24	145.24	145.24		0	0	0
									174.39	174.39	174.39		174.39	174.39	174.39		0	0	0
									247.7	247.7	247.7		247.7	247.7	247.7		0	0	0
									382.96	382.96	382.96		382.96	382.96	382.96		0	0	0
									597.13	597.13	597.13		597.13	597.13	597.13		0	0	0
									903.83	903.83	903.83		903.83	903.83	903.83		0	0	0
									1315.81	1315.81	1315.81		1315.81	1315.81	1315.81		0	0	0
									1845.85	1845.85	1845.85		1845.85	1845.85	1845.85		0	0	0
									2506.72	2506.72	2506.72		2506.72	2506.72	2506.72		0	0	0
									3307.04	4349.06	3993.44		3307.04	4349.06	3993.44		0	0	0
									4238.94	6712.85	5921.02		4238.94	6712.85	5921.02		0	0	0
									5290.4	9426.37	8229.61		5290.4	9426.37	8229.61		0	0	0
									6449.42	12317.9	10859.4		6449.42	12317.9	10859.4		0	0	0
									7703.98	15215.7	13750.4		7703.98	15215.7	13750.4		0	0	0
									9040.95	17980.2	16837.9		9040.95	17980.2	16837.9		0	0	0
									10442.8	20601.1	20036.7		10442.8	20601.1	20036.7		0	0	0
									11890.9	23099.8	23256.4		11890.9	23099.8	23256.4		0	0	0
									13366.7	25498.3	26407		13366.7	25498.3	26407		0	0	0
									14851.4	27818.2	29398.1		14851.4	27818.2	29398.1		0	0	0
									16328	30074.7	32158.3		16328	30074.7	32158.3		0	0	0
									17785.6	32257.7	34690.9		17785.6	32257.7	34690.9		0	0	0
									19214.9	34350.4	37017.7		19214.9	34350.4	37017.7		0	0	0
									20606.4	36336.2	39160.8		20606.4	36336.2	39160.8		0	0	0
									21951	38198.3	41142.1		21951	38198.3	41142.1		0	0	0
									23240	39924.3	42981.2		23240	39924.3	42981.2		0	0	0
									24469	41518.3	44688.4		24469	41518.3	44688.4		0	0	0
									25634	42988.4	46271.6		25634	42988.4	46271.6		0	0	0
									26731.3	44343	47738.7		26731.3	44343	47738.7		0	0	0
									27757.2	45590.3	49097.6		27757.2	45590.3	49097.6		0	0	0
									28708	46738.5	50356.3		28708	46738.5	50356.3		0	0	0
									29579.7	47796	51522.7		29579.7	47796	51522.7		0	0	0
									30368.8	48770.8	52604.6		30368.8	48770.8	52604.6		0	0	0
									31071.4	49671.4	53610		31071.4	49671.4	53610		0	0	0
									31683.8	50505.9	54546.8		31683.8	50505.9	54546.8		0	0	0

## Sheet: SI2.6 - Battery_chemisty_shares
scenario	NDC								2 ºC								1.5 ºC
Table:	Battery chemistry market shares
Source	Based on assumptions until 2024 from Degen et al. (2023) as well as market scenarios in the LFP case until 2040. Other scenarios own assumptions based on Degen et al. (2023). Market shares before 2018 are static in this model.
battery chemistry type	NMC532	NMC622	NMC811	NMC911	NCA	LFP	SIB	SSB	NMC532	NMC622	NMC811	NMC911	NCA	LFP	SIB	SSB	NMC532	NMC622	NMC811	NMC911	NCA	LFP	SIB	SSB
2005	0.0952382	0.277311	0.277311	0	0.277311	0.072829	0	0	0.0952382	0.277311	0.277311	0	0.277311	0.072829	0	0	0.0952382	0.277311	0.277311	0	0.277311	0.072829	0	0
2006	0.0952382	0.277311	0.277311	0	0.277311	0.072829	0	0	0.0952382	0.277311	0.277311	0	0.277311	0.072829	0	0	0.0952382	0.277311	0.277311	0	0.277311	0.072829	0	0
2007	0.0952382	0.277311	0.277311	0	0.277311	0.072829	0	0	0.0952382	0.277311	0.277311	0	0.277311	0.072829	0	0	0.0952382	0.277311	0.277311	0	0.277311	0.072829	0	0
2008	0.0952382	0.277311	0.277311	0	0.277311	0.072829	0	0	0.0952382	0.277311	0.277311	0	0.277311	0.072829	0	0	0.0952382	0.277311	0.277311	0	0.277311	0.072829	0	0
2009	0.0952382	0.277311	0.277311	0	0.277311	0.072829	0	0	0.0952382	0.277311	0.277311	0	0.277311	0.072829	0	0	0.0952382	0.277311	0.277311	0	0.277311	0.072829	0	0
2010	0.0952382	0.277311	0.277311	0	0.277311	0.072829	0	0	0.0952382	0.277311	0.277311	0	0.277311	0.072829	0	0	0.0952382	0.277311	0.277311	0	0.277311	0.072829	0	0
2011	0.0952382	0.277311	0.277311	0	0.277311	0.072829	0	0	0.0952382	0.277311	0.277311	0	0.277311	0.072829	0	0	0.0952382	0.277311	0.277311	0	0.277311	0.072829	0	0
2012	0.0952382	0.277311	0.277311	0	0.277311	0.072829	0	0	0.0952382	0.277311	0.277311	0	0.277311	0.072829	0	0	0.0952382	0.277311	0.277311	0	0.277311	0.072829	0	0
2013	0.0952382	0.277311	0.277311	0	0.277311	0.072829	0	0	0.0952382	0.277311	0.277311	0	0.277311	0.072829	0	0	0.0952382	0.277311	0.277311	0	0.277311	0.072829	0	0
2014	0.0952382	0.277311	0.277311	0	0.277311	0.072829	0	0	0.0952382	0.277311	0.277311	0	0.277311	0.072829	0	0	0.0952382	0.277311	0.277311	0	0.277311	0.072829	0	0
2015	0.0952382	0.277311	0.277311	0	0.277311	0.072829	0	0	0.0952382	0.277311	0.277311	0	0.277311	0.072829	0	0	0.0952382	0.277311	0.277311	0	0.277311	0.072829	0	0
2016	0.0952382	0.277311	0.277311	0	0.277311	0.072829	0	0	0.0952382	0.277311	0.277311	0	0.277311	0.072829	0	0	0.0952382	0.277311	0.277311	0	0.277311	0.072829	0	0
2017	0.0952382	0.277311	0.277311	0	0.277311	0.072829	0	0	0.0952382	0.277311	0.277311	0	0.277311	0.072829	0	0	0.0952382	0.277311	0.277311	0	0.277311	0.072829	0	0
2018	0.0952382	0.277311	0.277311	0	0.277311	0.072829	0	0	0.0952382	0.277311	0.277311	0	0.277311	0.072829	0	0	0.0952382	0.277311	0.277311	0	0.277311	0.072829	0	0
2019	0.0476192	0.307189	0.307189	0	0.307189	0.0308124	0	0	0.0476192	0.307189	0.307189	0	0.307189	0.0308124	0	0	0.0476192	0.307189	0.307189	0	0.307189	0.0308124	0	0
2020	0.044818	0.300654	0.300654	0	0.300654	0.0532212	0	0	0.044818	0.300654	0.300654	0	0.300654	0.0532212	0	0	0.044818	0.300654	0.300654	0	0.300654	0.0532212	0	0
2021	0.102564	0.203989	0.203989	0	0.203989	0.28547	0	0	0.102564	0.203989	0.203989	0	0.203989	0.28547	0	0	0.102564	0.203989	0.203989	0	0.203989	0.28547	0	0
2022	0.0878453	0.180111	0.180111	0	0.180111	0.371823	0	0	0.0878453	0.180111	0.180111	0	0.180111	0.371823	0	0	0.0878453	0.180111	0.180111	0	0.180111	0.371823	0	0
2023	0.076243	0.174033	0.174033	0	0.174033	0.401657	0	0	0.076243	0.174033	0.174033	0	0.174033	0.401657	0	0	0.076243	0.174033	0.174033	0	0.174033	0.401657	0	0
2024	0.0447514	0.151381	0.151381	0	0.151381	0.501105	0	0	0.0447514	0.151381	0.151381	0	0.151381	0.501105	0	0	0.0447514	0.151381	0.151381	0	0.151381	0.501105	0	0
2025	0.0420681	0.142943	0.147715	0.01125	0.142488	0.513536	0	0	0.0420681	0.142943	0.147715	0.0247859	0.142488	0.5	0	0	0.0420681	0.142943	0.147715	0.0247859	0.142488	0.5	0	0
2026	0.0393847	0.134504	0.144049	0.0225	0.133595	0.525967	0	0	0.0393847	0.134504	0.145727	0.0334163	0.136551	0.5	0.00208333	0.00833333	0.0393847	0.134504	0.143644	0.0292496	0.136551	0.5	0.00416667	0.0125
2027	0.0367014	0.126065	0.140384	0.03375	0.124702	0.538398	0	0	0.0367014	0.126065	0.143739	0.0420467	0.130614	0.5	0.00416667	0.0166667	0.0367014	0.126065	0.139572	0.0337134	0.130614	0.5	0.00833333	0.025
2028	0.0340181	0.117627	0.136718	0.045	0.115809	0.550829	0	0	0.0340181	0.117627	0.141751	0.0506771	0.124677	0.5	0.00625	0.025	0.0340181	0.117627	0.135501	0.0381771	0.124677	0.5	0.0125	0.0375
2029	0.0313348	0.109188	0.133052	0.05625	0.106915	0.56326	0	0	0.0313348	0.109188	0.139763	0.0593075	0.11874	0.5	0.00833333	0.0333333	0.0313348	0.109188	0.131429	0.0426408	0.11874	0.5	0.0166667	0.05
2030	0.0286514	0.10075	0.129386	0.0675	0.0980224	0.575691	0	0	0.0286514	0.10075	0.137775	0.0679379	0.112803	0.5	0.0104167	0.0416667	0.0286514	0.10075	0.127358	0.0471046	0.112803	0.5	0.0208333	0.0625
2031	0.0259681	0.092311	0.12572	0.07875	0.0891292	0.588122	0	0	0.0259681	0.092311	0.135787	0.0765683	0.106866	0.5	0.0125	0.05	0.0259681	0.092311	0.123287	0.0515683	0.106866	0.5	0.025	0.075
2032	0.0232848	0.0838724	0.122054	0.09	0.0802361	0.600552	0	0	0.0232848	0.0838724	0.133798	0.0851987	0.100929	0.5	0.0145833	0.0583333	0.0232848	0.0838724	0.119215	0.056032	0.100929	0.5	0.0291667	0.0875
2033	0.0206015	0.0754338	0.118388	0.10125	0.0713429	0.612983	0	0	0.0206015	0.0754338	0.13181	0.0938291	0.0949921	0.5	0.0166667	0.0666667	0.0206015	0.0754338	0.115144	0.0604958	0.0949921	0.5	0.0333333	0.1
2034	0.0179181	0.0669952	0.114723	0.1125	0.0624498	0.625414	0	0	0.0179181	0.0669952	0.129822	0.102459	0.089055	0.5	0.01875	0.075	0.0179181	0.0669952	0.111072	0.0649595	0.089055	0.5	0.0375	0.1125
2035	0.0152348	0.0585566	0.111057	0.12375	0.0535566	0.637845	0	0	0.0152348	0.0585566	0.127834	0.11109	0.083118	0.5	0.0208333	0.0833333	0.0152348	0.0585566	0.107001	0.0694232	0.083118	0.5	0.0416667	0.125
2036	0.0125515	0.050118	0.107391	0.135	0.0446635	0.650276	0	0	0.0125515	0.050118	0.125846	0.11972	0.077181	0.5	0.0229167	0.0916667	0.0125515	0.050118	0.102929	0.073887	0.077181	0.5	0.0458333	0.1375
2037	0.00986816	0.0416794	0.103725	0.14625	0.0357703	0.662707	0	0	0.00986816	0.0416794	0.123858	0.128351	0.071244	0.5	0.025	0.1	0.00986816	0.0416794	0.0988577	0.0783507	0.071244	0.5	0.05	0.15
2038	0.00718483	0.0332408	0.100059	0.1575	0.0268772	0.675138	0	0	0.00718483	0.0332408	0.12187	0.136981	0.065307	0.5	0.0270833	0.108333	0.00718483	0.0332408	0.0947862	0.0828144	0.065307	0.5	0.0541667	0.1625
2039	0.00450151	0.0248022	0.0963931	0.16875	0.0179841	0.687569	0	0	0.00450151	0.0248022	0.119881	0.145611	0.05937	0.5	0.0291667	0.116667	0.00450151	0.0248022	0.0907147	0.0872782	0.05937	0.5	0.0583333	0.175
2040	0.00181818	0.0163636	0.0927273	0.18	0.00909091	0.7	0	0	0.00181818	0.01	0.117893	0.160606	0.053433	0.5	0.03125	0.125	0.00181818	0.01	0.0866433	0.0981055	0.053433	0.5	0.0625	0.1875
2041	0.00181818	0.0163636	0.0927273	0.18	0.00909091	0.7	0	0	0	0.01	0.115905	0.159932	0.047496	0.5	0.0333333	0.133333	0	0.01	0.0825718	0.0932655	0.047496	0.5	0.0666667	0.2
2042	0.00181818	0.0163636	0.0927273	0.18	0.00909091	0.7	0	0	0	0	0.113917	0.167441	0.041559	0.5	0.0354167	0.141667	0	0	0.0785003	0.0966073	0.041559	0.5	0.0708333	0.2125
2043	0.00181818	0.0163636	0.0927273	0.18	0.00909091	0.7	0	0	0	0	0.111929	0.164949	0.035622	0.5	0.0375	0.15	0	0	0.0744288	0.0899491	0.035622	0.5	0.075	0.225
2044	0.00181818	0.0163636	0.0927273	0.18	0.00909091	0.7	0	0	0	0	0.109941	0.162458	0.029685	0.5	0.0395833	0.158333	0	0	0.0703574	0.083291	0.029685	0.5	0.0791667	0.2375
2045	0.00181818	0.0163636	0.0927273	0.18	0.00909091	0.7	0	0	0	0	0.107953	0.159966	0.023748	0.5	0.0416667	0.166667	0	0	0.0662859	0.0766328	0.023748	0.5	0.0833333	0.25
2046	0.00181818	0.0163636	0.0927273	0.18	0.00909091	0.7	0	0	0	0	0.105964	0.157475	0.017811	0.5	0.04375	0.175	0	0	0.0622144	0.0699746	0.017811	0.5	0.0875	0.2625
2047	0.00181818	0.0163636	0.0927273	0.18	0.00909091	0.7	0	0	0	0	0.103976	0.154983	0.011874	0.5	0.0458333	0.183333	0	0	0.0581429	0.0633164	0.011874	0.5	0.0916667	0.275
2048	0.00181818	0.0163636	0.0927273	0.18	0.00909091	0.7	0	0	0	0	0.101988	0.152492	0.005937	0.5	0.0479167	0.191667	0	0	0.0540715	0.0566582	0.005937	0.5	0.0958333	0.2875
2049	0.00181818	0.0163636	0.0927273	0.18	0.00909091	0.7	0	0	0	0	0.1	0.15	0	0.5	0.05	0.2	0	0	0.05	0.05	0	0.5	0.1	0.3
2050	0.00181818	0.0163636	0.0927273	0.18	0.00909091	0.7	0	0	0	0	0.1	0.15	0	0.5	0.05	0.2	0	0	0.05	0.05	0	0.5	0.1	0.3
Narrative	The battery market follows current trends, with LFP dominating. LFP reached about 50% market share in 2024, largely due to its extensive use in China. In the future, LFP adoption will grow further, reaching about 70% market share by 2050. The remaining market is distributed between NMC and NCA chemistries, with high-nickel NMC (NMC911) acquiring increasing relevance due to its higher energy densi…								Driven by more stringent climate targets and larger deployment of EVs, this scenario foster a higher development of batteries. Next-generation chemistries such as SIB and SSB will be commercialized and will gain increasing market share. LFP will continue to be the dominating chemistry maintaining a 50% market share. SSB as the most advanced next-generation battery will reach about 20% market shar…								Even more stringent climate targets and higher battery demand will further drive the commercialization of next-generation batteries. SSB reaches 30% and SIB 10% by 2050. NMC share decreases to 10% distributed between NMC811 and NMC911
Graph
Table:	Nickel sulfate content kg/kWh battery capacity
Source:	Degen et al. 2023
nickel sulfate content (kg/kWh battery capacity)	1.44548	1.68411	1.86054	1.89035	1.94218	0	1.36719	1.89035	1.44548	1.68411	1.86054	1.89035	1.94218	0	1.36719	1.89035	1.44548	1.68411	1.86054	1.89035	1.94218	0	1.36719	1.89035
																										NDC	2 ºC	1.5 ºC
Table:	Nickel sulfate content relative to market share [kg/kWh]. Market represents 1 kWh.																									Table:	Average nickel sulfate content [kg/kWh battery capacity of market average battery].
Source:	calculated																									Source:	calculated
2005	0.137665	0.467022	0.515949	0	0.538588	0	0	0	0.137665	0.467022	0.515949	0	0.538588	0	0	0	0.137665	0.467022	0.515949	0	0.538588	0	0	0		1.65922	1.65922	1.65922
2006	0.137665	0.467022	0.515949	0	0.538588	0	0	0	0.137665	0.467022	0.515949	0	0.538588	0	0	0	0.137665	0.467022	0.515949	0	0.538588	0	0	0		1.65922	1.65922	1.65922
2007	0.137665	0.467022	0.515949	0	0.538588	0	0	0	0.137665	0.467022	0.515949	0	0.538588	0	0	0	0.137665	0.467022	0.515949	0	0.538588	0	0	0		1.65922	1.65922	1.65922
2008	0.137665	0.467022	0.515949	0	0.538588	0	0	0	0.137665	0.467022	0.515949	0	0.538588	0	0	0	0.137665	0.467022	0.515949	0	0.538588	0	0	0		1.65922	1.65922	1.65922
2009	0.137665	0.467022	0.515949	0	0.538588	0	0	0	0.137665	0.467022	0.515949	0	0.538588	0	0	0	0.137665	0.467022	0.515949	0	0.538588	0	0	0		1.65922	1.65922	1.65922
2010	0.137665	0.467022	0.515949	0	0.538588	0	0	0	0.137665	0.467022	0.515949	0	0.538588	0	0	0	0.137665	0.467022	0.515949	0	0.538588	0	0	0		1.65922	1.65922	1.65922
2011	0.137665	0.467022	0.515949	0	0.538588	0	0	0	0.137665	0.467022	0.515949	0	0.538588	0	0	0	0.137665	0.467022	0.515949	0	0.538588	0	0	0		1.65922	1.65922	1.65922
2012	0.137665	0.467022	0.515949	0	0.538588	0	0	0	0.137665	0.467022	0.515949	0	0.538588	0	0	0	0.137665	0.467022	0.515949	0	0.538588	0	0	0		1.65922	1.65922	1.65922
2013	0.137665	0.467022	0.515949	0	0.538588	0	0	0	0.137665	0.467022	0.515949	0	0.538588	0	0	0	0.137665	0.467022	0.515949	0	0.538588	0	0	0		1.65922	1.65922	1.65922
2014	0.137665	0.467022	0.515949	0	0.538588	0	0	0	0.137665	0.467022	0.515949	0	0.538588	0	0	0	0.137665	0.467022	0.515949	0	0.538588	0	0	0		1.65922	1.65922	1.65922
2015	0.137665	0.467022	0.515949	0	0.538588	0	0	0	0.137665	0.467022	0.515949	0	0.538588	0	0	0	0.137665	0.467022	0.515949	0	0.538588	0	0	0		1.65922	1.65922	1.65922
2016	0.137665	0.467022	0.515949	0	0.538588	0	0	0	0.137665	0.467022	0.515949	0	0.538588	0	0	0	0.137665	0.467022	0.515949	0	0.538588	0	0	0		1.65922	1.65922	1.65922
2017	0.137665	0.467022	0.515949	0	0.538588	0	0	0	0.137665	0.467022	0.515949	0	0.538588	0	0	0	0.137665	0.467022	0.515949	0	0.538588	0	0	0		1.65922	1.65922	1.65922
2018	0.137665	0.467022	0.515949	0	0.538588	0	0	0	0.137665	0.467022	0.515949	0	0.538588	0	0	0	0.137665	0.467022	0.515949	0	0.538588	0	0	0		1.65922	1.65922	1.65922
2019	0.0688325	0.51734	0.57154	0	0.596617	0	0	0	0.0688325	0.51734	0.57154	0	0.596617	0	0	0	0.0688325	0.51734	0.57154	0	0.596617	0	0	0		1.75433	1.75433	1.75433
2020	0.0647834	0.506333	0.559379	0	0.583923	0	0	0	0.0647834	0.506333	0.559379	0	0.583923	0	0	0	0.0647834	0.506333	0.559379	0	0.583923	0	0	0		1.71442	1.71442	1.71442
2021	0.148254	0.343539	0.37953	0	0.396183	0	0	0	0.148254	0.343539	0.37953	0	0.396183	0	0	0	0.148254	0.343539	0.37953	0	0.396183	0	0	0		1.26751	1.26751	1.26751
2022	0.126978	0.303326	0.335104	0	0.349807	0	0	0	0.126978	0.303326	0.335104	0	0.349807	0	0	0	0.126978	0.303326	0.335104	0	0.349807	0	0	0		1.11521	1.11521	1.11521
2023	0.110207	0.293091	0.323796	0	0.338004	0	0	0	0.110207	0.293091	0.323796	0	0.338004	0	0	0	0.110207	0.293091	0.323796	0	0.338004	0	0	0		1.0651	1.0651	1.0651
2024	0.0646871	0.254942	0.281651	0	0.29401	0	0	0	0.0646871	0.254942	0.281651	0	0.29401	0	0	0	0.0646871	0.254942	0.281651	0	0.29401	0	0	0		0.895291	0.895291	0.895291
2025	0.0608084	0.240731	0.274831	0.0212665	0.276738	0	0	0	0.0608084	0.240731	0.274831	0.0468541	0.276738	0	0	0	0.0608084	0.240731	0.274831	0.0468541	0.276738	0	0	0		0.874374	0.899962	0.899962
2026	0.0569297	0.226519	0.26801	0.0425329	0.259465	0	0	0	0.0569297	0.226519	0.271132	0.0631686	0.265207	0	0.00284831	0.0157529	0.0569297	0.226519	0.267256	0.0552921	0.265207	0	0.00569661	0.0236294		0.853458	0.901558	0.90053
2027	0.053051	0.212308	0.26119	0.0637994	0.242193	0	0	0	0.053051	0.212308	0.267433	0.0794831	0.253676	0	0.00569661	0.0315059	0.053051	0.212308	0.259681	0.0637301	0.253676	0	0.0113932	0.0472588		0.832542	0.903153	0.901098
2028	0.0491723	0.198096	0.254369	0.0850659	0.224921	0	0	0	0.0491723	0.198096	0.263734	0.0957976	0.242145	0	0.00854492	0.0472588	0.0491723	0.198096	0.252105	0.0721682	0.242145	0	0.0170898	0.0708882		0.811625	0.904749	0.901666
2029	0.0452937	0.183885	0.247549	0.106332	0.207649	0	0	0	0.0452937	0.183885	0.260035	0.112112	0.230615	0	0.0113932	0.0630117	0.0452937	0.183885	0.24453	0.0806062	0.230615	0	0.0227865	0.0945176		0.790709	0.906345	0.902234
2030	0.041415	0.169673	0.240728	0.127599	0.190377	0	0	0	0.041415	0.169673	0.256336	0.128427	0.219084	0	0.0142415	0.0787647	0.041415	0.169673	0.236955	0.0890442	0.219084	0	0.0284831	0.118147		0.769793	0.907941	0.902802
2031	0.0375363	0.155462	0.233908	0.148865	0.173105	0	0	0	0.0375363	0.155462	0.252637	0.144741	0.207553	0	0.0170898	0.0945176	0.0375363	0.155462	0.22938	0.0974823	0.207553	0	0.0341797	0.141776		0.748876	0.909537	0.90337
2032	0.0336576	0.14125	0.227087	0.170132	0.155833	0	0	0	0.0336576	0.14125	0.248938	0.161056	0.196022	0	0.0199381	0.110271	0.0336576	0.14125	0.221805	0.10592	0.196022	0	0.0398763	0.165406		0.72796	0.911132	0.903938
2033	0.0297789	0.127039	0.220267	0.191398	0.138561	0	0	0	0.0297789	0.127039	0.245239	0.17737	0.184492	0	0.0227865	0.126023	0.0297789	0.127039	0.21423	0.114358	0.184492	0	0.0455729	0.189035		0.707043	0.912728	0.904506
2034	0.0259002	0.112827	0.213446	0.212665	0.121289	0	0	0	0.0259002	0.112827	0.24154	0.193685	0.172961	0	0.0256348	0.141776	0.0259002	0.112827	0.206655	0.122796	0.172961	0	0.0512695	0.212665		0.686127	0.914324	0.905074
2035	0.0220216	0.0986157	0.206626	0.233931	0.104017	0	0	0	0.0220216	0.0986157	0.237841	0.209999	0.16143	0	0.0284831	0.157529	0.0220216	0.0986157	0.199079	0.131234	0.16143	0	0.0569661	0.236294		0.665211	0.91592	0.905641
2036	0.0181429	0.0844042	0.199805	0.255198	0.0867445	0	0	0	0.0181429	0.0844042	0.234142	0.226314	0.149899	0	0.0313314	0.173282	0.0181429	0.0844042	0.191504	0.139672	0.149899	0	0.0626627	0.259923		0.644294	0.917516	0.906209
2037	0.0142642	0.0701927	0.192985	0.276464	0.0694725	0	0	0	0.0142642	0.0701927	0.230443	0.242628	0.138369	0	0.0341797	0.189035	0.0142642	0.0701927	0.183929	0.14811	0.138369	0	0.0683594	0.283553		0.623378	0.919111	0.906777
2038	0.0103855	0.0559812	0.186164	0.297731	0.0522004	0	0	0	0.0103855	0.0559812	0.226744	0.258943	0.126838	0	0.037028	0.204788	0.0103855	0.0559812	0.176354	0.156548	0.126838	0	0.074056	0.307182		0.602462	0.920707	0.907345
2039	0.00650682	0.0417697	0.179344	0.318997	0.0349283	0	0	0	0.00650682	0.0417697	0.223045	0.275257	0.115307	0	0.0398763	0.220541	0.00650682	0.0417697	0.168779	0.164986	0.115307	0	0.0797526	0.330812		0.581545	0.922303	0.907913
2040	0.00262814	0.0275581	0.172523	0.340263	0.0176562	0	0	0	0.00262814	0.0168411	0.219346	0.303601	0.103777	0	0.0427246	0.236294	0.00262814	0.0168411	0.161204	0.185454	0.103777	0	0.0854492	0.354441		0.560629	0.925211	0.909794
2041	0.00262814	0.0275581	0.172523	0.340263	0.0176562	0	0	0	0	0.0168411	0.215647	0.302328	0.0922458	0	0.0455729	0.252047	0	0.0168411	0.153628	0.176305	0.0922458	0	0.0911458	0.37807		0.560629	0.924682	0.908236
2042	0.00262814	0.0275581	0.172523	0.340263	0.0176562	0	0	0	0	0	0.211948	0.316522	0.0807151	0	0.0484212	0.2678	0	0	0.146053	0.182622	0.0807151	0	0.0968424	0.4017		0.560629	0.925406	0.907933
2043	0.00262814	0.0275581	0.172523	0.340263	0.0176562	0	0	0	0	0	0.208249	0.311812	0.0691844	0	0.0512695	0.283553	0	0	0.138478	0.170036	0.0691844	0	0.102539	0.425329		0.560629	0.924067	0.905566
2044	0.00262814	0.0275581	0.172523	0.340263	0.0176562	0	0	0	0	0	0.20455	0.307102	0.0576537	0	0.0541178	0.299306	0	0	0.130903	0.157449	0.0576537	0	0.108236	0.448959		0.560629	0.922729	0.9032
2045	0.00262814	0.0275581	0.172523	0.340263	0.0176562	0	0	0	0	0	0.200851	0.302392	0.0461229	0	0.0569661	0.315059	0	0	0.123328	0.144863	0.0461229	0	0.113932	0.472588		0.560629	0.921391	0.900834
2046	0.00262814	0.0275581	0.172523	0.340263	0.0176562	0	0	0	0	0	0.197151	0.297682	0.0345922	0	0.0598144	0.330812	0	0	0.115753	0.132277	0.0345922	0	0.119629	0.496218		0.560629	0.920052	0.898468
2047	0.00262814	0.0275581	0.172523	0.340263	0.0176562	0	0	0	0	0	0.193452	0.292973	0.0230615	0	0.0626627	0.346565	0	0	0.108178	0.11969	0.0230615	0	0.125325	0.519847		0.560629	0.918714	0.896102
2048	0.00262814	0.0275581	0.172523	0.340263	0.0176562	0	0	0	0	0	0.189753	0.288263	0.0115307	0	0.0655111	0.362318	0	0	0.100602	0.107104	0.0115307	0	0.131022	0.543476		0.560629	0.917376	0.893735
2049	0.00262814	0.0275581	0.172523	0.340263	0.0176562	0	0	0	0	0	0.186054	0.283553	0	0	0.0683594	0.37807	0	0	0.0930272	0.0945176	0	0	0.136719	0.567106		0.560629	0.916037	0.891369
2050	0.00262814	0.0275581	0.172523	0.340263	0.0176562	0	0	0	0	0	0.186054	0.283553	0	0	0.0683594	0.37807	0	0	0.0930272	0.0945176	0	0	0.136719	0.567106		0.560629	0.916037	0.891369

## Sheet: SI2.7 - Battery_stock
stock (kWh battery cap/yr)
												EV and battery lifespan distribution (Xu et al. (2022))
	time (years)	NDC	2 ºC	1.5 ºC					age (years)	survival curve		Weibull parameters
	2005	235032000	235032000	235032000					0	1		min	1
	2006	198492000	198492000	198492000					1	0.992755		most likley	15
	2007	190092000	190092000	190092000					2	0.965541		max	20
	2008	2.03812e+08	2.03812e+08	2.03812e+08					3	0.915741		alpha	2.26977
	2009	233660000	233660000	233660000					4	0.844416		beta	8.75199
	2010	273588000	273588000	273588000					5	0.755307
	2011	3.17632e+08	3.17632e+08	3.17632e+08					6	0.654109
	2012	359800000	359800000	359800000					7	0.547551
	2013	3.94072e+08	3.94072e+08	3.94072e+08					8	0.442404
	2014	4.14456e+08	4.14456e+08	4.14456e+08					9	0.344562
	2015	4.14932e+08	4.14932e+08	4.14932e+08					10	0.258378
	2016	3.98832e+08	3.98832e+08	3.98832e+08					11	0.18634
	2017	4.06672e+08	4.06672e+08	4.06672e+08					12	0.129115
	2018	4.88292e+08	4.88292e+08	4.88292e+08					13	0.0858736
	2019	693560000	693560000	693560000					14	0.0547723
	2020	1.07229e+09	1.07229e+09	1.07229e+09					15	0.0334745
	2021	1671964000	1671964000	1671964000					16	0.0195872
	2022	2530724000	2530724000	2530724000					17	0.0109648
	2023	3684268000	3684268000	3684268000					18	0.00586795
	2024	5168380000	5168380000	5168380000					19	0.003
	2025	7.01882e+09	7.01882e+09	7.01882e+09					20	0.00146425
	2026	9259712000	1.21774e+10	11181632000					21	0.000681849
	2027	1.1869e+10	18795980000	1.65789e+10					22	0.000302739
	2028	14813120000	26393836000	23042908000					23	0.000128084
	2029	18058376000	34490064000	3.04062e+10					24	5.16079e-05
	2030	21571144000	42603848000	38501204000					25	1.97918e-05
	2031	2.53147e+10	5.03446e+10	47146148000					26	7.22046e-06
	2032	29239896000	57682968000	56102620000					27	2.50452e-06
	2033	33294632000	64679580000	65117976000					28	8.25546e-07
	2034	37426676000	71395296000	73939572000					29	2.58461e-07
	2035	41583892000	7.78909e+10	82314792000					30	7.68198e-08
	2036	45718400000	84209244000	90043380000					31	2.16655e-08
	2037	49799708000	9.03216e+10	97134464000					32	5.79535e-09
	2038	5.38016e+10	96181176000	103649560000					33	1.46963e-09
	2039	57698032000	101741332000	109650156000					34	3.5315e-10
	2040	61462716000	1.06955e+11	1.15198e+11					35	8.03795e-11
	2041	6.50721e+10	111788180000	120347248000					36	1.73214e-11
	2042	68513088000	1.16251e+11	125127408000					37	3.53251e-12
	2043	71775144000	120367632000	1.2956e+11					38	6.81566e-13
	2044	74847696000	124160484000	1.33668e+11					39	1.24345e-13
	2045	7.77203e+10	127652896000	1.37473e+11					40	2.14273e-14
	2046	80382316000	1.30868e+11	140997668000					41	3.44169e-15
	2047	82823272000	133828688000	144263448000					42	0
	2048	85032668000	1.36558e+11	147292796000					43	0
	2049	86999920000	139079836000	150107944000					44	0
	2050	88714528000	141416408000	152730984000					45	0

## Sheet: Survival_curve_matrix
		cohorts ->
		2005	2006	2007	2008	2009	2010	2011	2012	2013	2014	2015	2016	2017	2018	2019	2020	2021	2022	2023	2024	2025	2026	2027	2028	2029	2030	2031	2032	2033	2034	2035	2036	2037	2038	2039	2040	2041	2042	2043	2044	2045	2046	2047	2048	2049	2050
years	2005	1	0	0	0	0	0	0	0	0	0	0	0	0	0	0	0	0	0	0	0	0	0	0	0	0	0	0	0	0	0	0	0	0	0	0	0	0	0	0	0	0	0	0	0	0	0
	2006	0.992755	1	0	0	0	0	0	0	0	0	0	0	0	0	0	0	0	0	0	0	0	0	0	0	0	0	0	0	0	0	0	0	0	0	0	0	0	0	0	0	0	0	0	0	0	0
	2007	0.965541	0.992755	1	0	0	0	0	0	0	0	0	0	0	0	0	0	0	0	0	0	0	0	0	0	0	0	0	0	0	0	0	0	0	0	0	0	0	0	0	0	0	0	0	0	0	0
	2008	0.915741	0.965541	0.992755	1	0	0	0	0	0	0	0	0	0	0	0	0	0	0	0	0	0	0	0	0	0	0	0	0	0	0	0	0	0	0	0	0	0	0	0	0	0	0	0	0	0	0
	2009	0.844416	0.915741	0.965541	0.992755	1	0	0	0	0	0	0	0	0	0	0	0	0	0	0	0	0	0	0	0	0	0	0	0	0	0	0	0	0	0	0	0	0	0	0	0	0	0	0	0	0	0
	2010	0.755307	0.844416	0.915741	0.965541	0.992755	1	0	0	0	0	0	0	0	0	0	0	0	0	0	0	0	0	0	0	0	0	0	0	0	0	0	0	0	0	0	0	0	0	0	0	0	0	0	0	0	0
	2011	0.654109	0.755307	0.844416	0.915741	0.965541	0.992755	1	0	0	0	0	0	0	0	0	0	0	0	0	0	0	0	0	0	0	0	0	0	0	0	0	0	0	0	0	0	0	0	0	0	0	0	0	0	0	0
	2012	0.547551	0.654109	0.755307	0.844416	0.915741	0.965541	0.992755	1	0	0	0	0	0	0	0	0	0	0	0	0	0	0	0	0	0	0	0	0	0	0	0	0	0	0	0	0	0	0	0	0	0	0	0	0	0	0
	2013	0.442404	0.547551	0.654109	0.755307	0.844416	0.915741	0.965541	0.992755	1	0	0	0	0	0	0	0	0	0	0	0	0	0	0	0	0	0	0	0	0	0	0	0	0	0	0	0	0	0	0	0	0	0	0	0	0	0
	2014	0.344562	0.442404	0.547551	0.654109	0.755307	0.844416	0.915741	0.965541	0.992755	1	0	0	0	0	0	0	0	0	0	0	0	0	0	0	0	0	0	0	0	0	0	0	0	0	0	0	0	0	0	0	0	0	0	0	0	0
	2015	0.258378	0.344562	0.442404	0.547551	0.654109	0.755307	0.844416	0.915741	0.965541	0.992755	1	0	0	0	0	0	0	0	0	0	0	0	0	0	0	0	0	0	0	0	0	0	0	0	0	0	0	0	0	0	0	0	0	0	0	0
	2016	0.18634	0.258378	0.344562	0.442404	0.547551	0.654109	0.755307	0.844416	0.915741	0.965541	0.992755	1	0	0	0	0	0	0	0	0	0	0	0	0	0	0	0	0	0	0	0	0	0	0	0	0	0	0	0	0	0	0	0	0	0	0
	2017	0.129115	0.18634	0.258378	0.344562	0.442404	0.547551	0.654109	0.755307	0.844416	0.915741	0.965541	0.992755	1	0	0	0	0	0	0	0	0	0	0	0	0	0	0	0	0	0	0	0	0	0	0	0	0	0	0	0	0	0	0	0	0	0
	2018	0.0858736	0.129115	0.18634	0.258378	0.344562	0.442404	0.547551	0.654109	0.755307	0.844416	0.915741	0.965541	0.992755	1	0	0	0	0	0	0	0	0	0	0	0	0	0	0	0	0	0	0	0	0	0	0	0	0	0	0	0	0	0	0	0	0
	2019	0.0547723	0.0858736	0.129115	0.18634	0.258378	0.344562	0.442404	0.547551	0.654109	0.755307	0.844416	0.915741	0.965541	0.992755	1	0	0	0	0	0	0	0	0	0	0	0	0	0	0	0	0	0	0	0	0	0	0	0	0	0	0	0	0	0	0	0
	2020	0.0334745	0.0547723	0.0858736	0.129115	0.18634	0.258378	0.344562	0.442404	0.547551	0.654109	0.755307	0.844416	0.915741	0.965541	0.992755	1	0	0	0	0	0	0	0	0	0	0	0	0	0	0	0	0	0	0	0	0	0	0	0	0	0	0	0	0	0	0
	2021	0.0195872	0.0334745	0.0547723	0.0858736	0.129115	0.18634	0.258378	0.344562	0.442404	0.547551	0.654109	0.755307	0.844416	0.915741	0.965541	0.992755	1	0	0	0	0	0	0	0	0	0	0	0	0	0	0	0	0	0	0	0	0	0	0	0	0	0	0	0	0	0
	2022	0.0109648	0.0195872	0.0334745	0.0547723	0.0858736	0.129115	0.18634	0.258378	0.344562	0.442404	0.547551	0.654109	0.755307	0.844416	0.915741	0.965541	0.992755	1	0	0	0	0	0	0	0	0	0	0	0	0	0	0	0	0	0	0	0	0	0	0	0	0	0	0	0	0
	2023	0.00586795	0.0109648	0.0195872	0.0334745	0.0547723	0.0858736	0.129115	0.18634	0.258378	0.344562	0.442404	0.547551	0.654109	0.755307	0.844416	0.915741	0.965541	0.992755	1	0	0	0	0	0	0	0	0	0	0	0	0	0	0	0	0	0	0	0	0	0	0	0	0	0	0	0
	2024	0.003	0.00586795	0.0109648	0.0195872	0.0334745	0.0547723	0.0858736	0.129115	0.18634	0.258378	0.344562	0.442404	0.547551	0.654109	0.755307	0.844416	0.915741	0.965541	0.992755	1	0	0	0	0	0	0	0	0	0	0	0	0	0	0	0	0	0	0	0	0	0	0	0	0	0	0
	2025	0.00146425	0.003	0.00586795	0.0109648	0.0195872	0.0334745	0.0547723	0.0858736	0.129115	0.18634	0.258378	0.344562	0.442404	0.547551	0.654109	0.755307	0.844416	0.915741	0.965541	0.992755	1	0	0	0	0	0	0	0	0	0	0	0	0	0	0	0	0	0	0	0	0	0	0	0	0	0
	2026	0.000681849	0.00146425	0.003	0.00586795	0.0109648	0.0195872	0.0334745	0.0547723	0.0858736	0.129115	0.18634	0.258378	0.344562	0.442404	0.547551	0.654109	0.755307	0.844416	0.915741	0.965541	0.992755	1	0	0	0	0	0	0	0	0	0	0	0	0	0	0	0	0	0	0	0	0	0	0	0	0
	2027	0.000302739	0.000681849	0.00146425	0.003	0.00586795	0.0109648	0.0195872	0.0334745	0.0547723	0.0858736	0.129115	0.18634	0.258378	0.344562	0.442404	0.547551	0.654109	0.755307	0.844416	0.915741	0.965541	0.992755	1	0	0	0	0	0	0	0	0	0	0	0	0	0	0	0	0	0	0	0	0	0	0	0
	2028	0.000128084	0.000302739	0.000681849	0.00146425	0.003	0.00586795	0.0109648	0.0195872	0.0334745	0.0547723	0.0858736	0.129115	0.18634	0.258378	0.344562	0.442404	0.547551	0.654109	0.755307	0.844416	0.915741	0.965541	0.992755	1	0	0	0	0	0	0	0	0	0	0	0	0	0	0	0	0	0	0	0	0	0	0
	2029	5.16079e-05	0.000128084	0.000302739	0.000681849	0.00146425	0.003	0.00586795	0.0109648	0.0195872	0.0334745	0.0547723	0.0858736	0.129115	0.18634	0.258378	0.344562	0.442404	0.547551	0.654109	0.755307	0.844416	0.915741	0.965541	0.992755	1	0	0	0	0	0	0	0	0	0	0	0	0	0	0	0	0	0	0	0	0	0
	2030	1.97918e-05	5.16079e-05	0.000128084	0.000302739	0.000681849	0.00146425	0.003	0.00586795	0.0109648	0.0195872	0.0334745	0.0547723	0.0858736	0.129115	0.18634	0.258378	0.344562	0.442404	0.547551	0.654109	0.755307	0.844416	0.915741	0.965541	0.992755	1	0	0	0	0	0	0	0	0	0	0	0	0	0	0	0	0	0	0	0	0
	2031	7.22046e-06	1.97918e-05	5.16079e-05	0.000128084	0.000302739	0.000681849	0.00146425	0.003	0.00586795	0.0109648	0.0195872	0.0334745	0.0547723	0.0858736	0.129115	0.18634	0.258378	0.344562	0.442404	0.547551	0.654109	0.755307	0.844416	0.915741	0.965541	0.992755	1	0	0	0	0	0	0	0	0	0	0	0	0	0	0	0	0	0	0	0
	2032	2.50452e-06	7.22046e-06	1.97918e-05	5.16079e-05	0.000128084	0.000302739	0.000681849	0.00146425	0.003	0.00586795	0.0109648	0.0195872	0.0334745	0.0547723	0.0858736	0.129115	0.18634	0.258378	0.344562	0.442404	0.547551	0.654109	0.755307	0.844416	0.915741	0.965541	0.992755	1	0	0	0	0	0	0	0	0	0	0	0	0	0	0	0	0	0	0
	2033	8.25546e-07	2.50452e-06	7.22046e-06	1.97918e-05	5.16079e-05	0.000128084	0.000302739	0.000681849	0.00146425	0.003	0.00586795	0.0109648	0.0195872	0.0334745	0.0547723	0.0858736	0.129115	0.18634	0.258378	0.344562	0.442404	0.547551	0.654109	0.755307	0.844416	0.915741	0.965541	0.992755	1	0	0	0	0	0	0	0	0	0	0	0	0	0	0	0	0	0
	2034	2.58461e-07	8.25546e-07	2.50452e-06	7.22046e-06	1.97918e-05	5.16079e-05	0.000128084	0.000302739	0.000681849	0.00146425	0.003	0.00586795	0.0109648	0.0195872	0.0334745	0.0547723	0.0858736	0.129115	0.18634	0.258378	0.344562	0.442404	0.547551	0.654109	0.755307	0.844416	0.915741	0.965541	0.992755	1	0	0	0	0	0	0	0	0	0	0	0	0	0	0	0	0
	2035	7.68198e-08	2.58461e-07	8.25546e-07	2.50452e-06	7.22046e-06	1.97918e-05	5.16079e-05	0.000128084	0.000302739	0.000681849	0.00146425	0.003	0.00586795	0.0109648	0.0195872	0.0334745	0.0547723	0.0858736	0.129115	0.18634	0.258378	0.344562	0.442404	0.547551	0.654109	0.755307	0.844416	0.915741	0.965541	0.992755	1	0	0	0	0	0	0	0	0	0	0	0	0	0	0	0
	2036	2.16655e-08	7.68198e-08	2.58461e-07	8.25546e-07	2.50452e-06	7.22046e-06	1.97918e-05	5.16079e-05	0.000128084	0.000302739	0.000681849	0.00146425	0.003	0.00586795	0.0109648	0.0195872	0.0334745	0.0547723	0.0858736	0.129115	0.18634	0.258378	0.344562	0.442404	0.547551	0.654109	0.755307	0.844416	0.915741	0.965541	0.992755	1	0	0	0	0	0	0	0	0	0	0	0	0	0	0
	2037	5.79535e-09	2.16655e-08	7.68198e-08	2.58461e-07	8.25546e-07	2.50452e-06	7.22046e-06	1.97918e-05	5.16079e-05	0.000128084	0.000302739	0.000681849	0.00146425	0.003	0.00586795	0.0109648	0.0195872	0.0334745	0.0547723	0.0858736	0.129115	0.18634	0.258378	0.344562	0.442404	0.547551	0.654109	0.755307	0.844416	0.915741	0.965541	0.992755	1	0	0	0	0	0	0	0	0	0	0	0	0	0
	2038	1.46963e-09	5.79535e-09	2.16655e-08	7.68198e-08	2.58461e-07	8.25546e-07	2.50452e-06	7.22046e-06	1.97918e-05	5.16079e-05	0.000128084	0.000302739	0.000681849	0.00146425	0.003	0.00586795	0.0109648	0.0195872	0.0334745	0.0547723	0.0858736	0.129115	0.18634	0.258378	0.344562	0.442404	0.547551	0.654109	0.755307	0.844416	0.915741	0.965541	0.992755	1	0	0	0	0	0	0	0	0	0	0	0	0
	2039	3.5315e-10	1.46963e-09	5.79535e-09	2.16655e-08	7.68198e-08	2.58461e-07	8.25546e-07	2.50452e-06	7.22046e-06	1.97918e-05	5.16079e-05	0.000128084	0.000302739	0.000681849	0.00146425	0.003	0.00586795	0.0109648	0.0195872	0.0334745	0.0547723	0.0858736	0.129115	0.18634	0.258378	0.344562	0.442404	0.547551	0.654109	0.755307	0.844416	0.915741	0.965541	0.992755	1	0	0	0	0	0	0	0	0	0	0	0
	2040	8.03795e-11	3.5315e-10	1.46963e-09	5.79535e-09	2.16655e-08	7.68198e-08	2.58461e-07	8.25546e-07	2.50452e-06	7.22046e-06	1.97918e-05	5.16079e-05	0.000128084	0.000302739	0.000681849	0.00146425	0.003	0.00586795	0.0109648	0.0195872	0.0334745	0.0547723	0.0858736	0.129115	0.18634	0.258378	0.344562	0.442404	0.547551	0.654109	0.755307	0.844416	0.915741	0.965541	0.992755	1	0	0	0	0	0	0	0	0	0	0
	2041	1.73214e-11	8.03795e-11	3.5315e-10	1.46963e-09	5.79535e-09	2.16655e-08	7.68198e-08	2.58461e-07	8.25546e-07	2.50452e-06	7.22046e-06	1.97918e-05	5.16079e-05	0.000128084	0.000302739	0.000681849	0.00146425	0.003	0.00586795	0.0109648	0.0195872	0.0334745	0.0547723	0.0858736	0.129115	0.18634	0.258378	0.344562	0.442404	0.547551	0.654109	0.755307	0.844416	0.915741	0.965541	0.992755	1	0	0	0	0	0	0	0	0	0
	2042	3.53251e-12	1.73214e-11	8.03795e-11	3.5315e-10	1.46963e-09	5.79535e-09	2.16655e-08	7.68198e-08	2.58461e-07	8.25546e-07	2.50452e-06	7.22046e-06	1.97918e-05	5.16079e-05	0.000128084	0.000302739	0.000681849	0.00146425	0.003	0.00586795	0.0109648	0.0195872	0.0334745	0.0547723	0.0858736	0.129115	0.18634	0.258378	0.344562	0.442404	0.547551	0.654109	0.755307	0.844416	0.915741	0.965541	0.992755	1	0	0	0	0	0	0	0	0
	2043	6.81566e-13	3.53251e-12	1.73214e-11	8.03795e-11	3.5315e-10	1.46963e-09	5.79535e-09	2.16655e-08	7.68198e-08	2.58461e-07	8.25546e-07	2.50452e-06	7.22046e-06	1.97918e-05	5.16079e-05	0.000128084	0.000302739	0.000681849	0.00146425	0.003	0.00586795	0.0109648	0.0195872	0.0334745	0.0547723	0.0858736	0.129115	0.18634	0.258378	0.344562	0.442404	0.547551	0.654109	0.755307	0.844416	0.915741	0.965541	0.992755	1	0	0	0	0	0	0	0
	2044	1.24345e-13	6.81566e-13	3.53251e-12	1.73214e-11	8.03795e-11	3.5315e-10	1.46963e-09	5.79535e-09	2.16655e-08	7.68198e-08	2.58461e-07	8.25546e-07	2.50452e-06	7.22046e-06	1.97918e-05	5.16079e-05	0.000128084	0.000302739	0.000681849	0.00146425	0.003	0.00586795	0.0109648	0.0195872	0.0334745	0.0547723	0.0858736	0.129115	0.18634	0.258378	0.344562	0.442404	0.547551	0.654109	0.755307	0.844416	0.915741	0.965541	0.992755	1	0	0	0	0	0	0
	2045	2.14273e-14	1.24345e-13	6.81566e-13	3.53251e-12	1.73214e-11	8.03795e-11	3.5315e-10	1.46963e-09	5.79535e-09	2.16655e-08	7.68198e-08	2.58461e-07	8.25546e-07	2.50452e-06	7.22046e-06	1.97918e-05	5.16079e-05	0.000128084	0.000302739	0.000681849	0.00146425	0.003	0.00586795	0.0109648	0.0195872	0.0334745	0.0547723	0.0858736	0.129115	0.18634	0.258378	0.344562	0.442404	0.547551	0.654109	0.755307	0.844416	0.915741	0.965541	0.992755	1	0	0	0	0	0
	2046	3.44169e-15	2.14273e-14	1.24345e-13	6.81566e-13	3.53251e-12	1.73214e-11	8.03795e-11	3.5315e-10	1.46963e-09	5.79535e-09	2.16655e-08	7.68198e-08	2.58461e-07	8.25546e-07	2.50452e-06	7.22046e-06	1.97918e-05	5.16079e-05	0.000128084	0.000302739	0.000681849	0.00146425	0.003	0.00586795	0.0109648	0.0195872	0.0334745	0.0547723	0.0858736	0.129115	0.18634	0.258378	0.344562	0.442404	0.547551	0.654109	0.755307	0.844416	0.915741	0.965541	0.992755	1	0	0	0	0
	2047	0	3.44169e-15	2.14273e-14	1.24345e-13	6.81566e-13	3.53251e-12	1.73214e-11	8.03795e-11	3.5315e-10	1.46963e-09	5.79535e-09	2.16655e-08	7.68198e-08	2.58461e-07	8.25546e-07	2.50452e-06	7.22046e-06	1.97918e-05	5.16079e-05	0.000128084	0.000302739	0.000681849	0.00146425	0.003	0.00586795	0.0109648	0.0195872	0.0334745	0.0547723	0.0858736	0.129115	0.18634	0.258378	0.344562	0.442404	0.547551	0.654109	0.755307	0.844416	0.915741	0.965541	0.992755	1	0	0	0
	2048	0	0	3.44169e-15	2.14273e-14	1.24345e-13	6.81566e-13	3.53251e-12	1.73214e-11	8.03795e-11	3.5315e-10	1.46963e-09	5.79535e-09	2.16655e-08	7.68198e-08	2.58461e-07	8.25546e-07	2.50452e-06	7.22046e-06	1.97918e-05	5.16079e-05	0.000128084	0.000302739	0.000681849	0.00146425	0.003	0.00586795	0.0109648	0.0195872	0.0334745	0.0547723	0.0858736	0.129115	0.18634	0.258378	0.344562	0.442404	0.547551	0.654109	0.755307	0.844416	0.915741	0.965541	0.992755	1	0	0
	2049	0	0	0	3.44169e-15	2.14273e-14	1.24345e-13	6.81566e-13	3.53251e-12	1.73214e-11	8.03795e-11	3.5315e-10	1.46963e-09	5.79535e-09	2.16655e-08	7.68198e-08	2.58461e-07	8.25546e-07	2.50452e-06	7.22046e-06	1.97918e-05	5.16079e-05	0.000128084	0.000302739	0.000681849	0.00146425	0.003	0.00586795	0.0109648	0.0195872	0.0334745	0.0547723	0.0858736	0.129115	0.18634	0.258378	0.344562	0.442404	0.547551	0.654109	0.755307	0.844416	0.915741	0.965541	0.992755	1	0
	2050	0	0	0	0	3.44169e-15	2.14273e-14	1.24345e-13	6.81566e-13	3.53251e-12	1.73214e-11	8.03795e-11	3.5315e-10	1.46963e-09	5.79535e-09	2.16655e-08	7.68198e-08	2.58461e-07	8.25546e-07	2.50452e-06	7.22046e-06	1.97918e-05	5.16079e-05	0.000128084	0.000302739	0.000681849	0.00146425	0.003	0.00586795	0.0109648	0.0195872	0.0334745	0.0547723	0.0858736	0.129115	0.18634	0.258378	0.344562	0.442404	0.547551	0.654109	0.755307	0.844416	0.915741	0.965541	0.992755	1

## Sheet: SI2.8 - Battery_inflow_NDC
				inflows (kWh/y) [transposed]:	235032000	-3.48371e+07	-2.25619e+06	2.446e+07	4.49928e+07	5.92657e+07	6.74356e+07	6.95727e+07	6.57239e+07	5.5916e+07	3.99953e+07	2.70277e+07	5.38053e+07	1.29557e+08	2.5512e+08	4.32422e+08	6.62339e+08	9.3982e+08	1.26754e+09	1.6511e+09	2.09608e+09	2.59634e+09	3.11078e+09	3.632e+09	4.16265e+09	4.70354e+09	5.2507e+09	5.7896e+09	6.31354e+09	6.81796e+09	7.29751e+09	7.7505e+09	8.18807e+09	8.60836e+09	9.00563e+09	9.37472e+09	9.71371e+09	1.00291e+10	1.03201e+10	1.0584e+10	1.08185e+10	1.10219e+10	1.11924e+10	1.1329e+10	1.14303e+10
outflows (kWh/y)	nas (kWh/y)	inflows (kWh/y)			2005	2006	2007	2008	2009	2010	2011	2012	2013	2014	2015	2016	2017	2018	2019	2020	2021	2022	2023	2024	2025	2026	2027	2028	2029	2030	2031	2032	2033	2034	2035	2036	2037	2038	2039	2040	2041	2042	2043	2044	2045	2046	2047	2048	2049
0	235032000	235032000		2005	0	0	0	0	0	0	0	0	0	0	0	0	0	0	0	0	0	0	0	0	0	0	0	0	0	0	0	0	0	0	0	0	0	0	0	0	0	0	0	0	0	0	0	0	0
1.70286e+06	-36540000	-3.48371e+07		2006	2.33329e+08	0	0	0	0	0	0	0	0	0	0	0	0	0	0	0	0	0	0	0	0	0	0	0	0	0	0	0	0	0	0	0	0	0	0	0	0	0	0	0	0	0	0	0	0
6.14381e+06	-8400000	-2.25619e+06		2007	2.26933e+08	-3.45847e+07	0	0	0	0	0	0	0	0	0	0	0	0	0	0	0	0	0	0	0	0	0	0	0	0	0	0	0	0	0	0	0	0	0	0	0	0	0	0	0	0	0	0	0
1.074e+07	1.372e+07	2.446e+07		2008	2.15229e+08	-3.36367e+07	-2.23985e+06	0	0	0	0	0	0	0	0	0	0	0	0	0	0	0	0	0	0	0	0	0	0	0	0	0	0	0	0	0	0	0	0	0	0	0	0	0	0	0	0	0	0
1.51448e+07	2.9848e+07	4.49928e+07		2009	1.98465e+08	-3.19018e+07	-2.17845e+06	2.42828e+07	0	0	0	0	0	0	0	0	0	0	0	0	0	0	0	0	0	0	0	0	0	0	0	0	0	0	0	0	0	0	0	0	0	0	0	0	0	0	0	0	0
1.93377e+07	39928000	5.92657e+07		2010	1.77521e+08	-2.9417e+07	-2.06609e+06	2.36171e+07	4.46668e+07	0	0	0	0	0	0	0	0	0	0	0	0	0	0	0	0	0	0	0	0	0	0	0	0	0	0	0	0	0	0	0	0	0	0	0	0	0	0	0	0
2.33916e+07	4.4044e+07	6.74356e+07		2011	1.53737e+08	-2.63127e+07	-1.90516e+06	2.2399e+07	4.34424e+07	5.88363e+07	0	0	0	0	0	0	0	0	0	0	0	0	0	0	0	0	0	0	0	0	0	0	0	0	0	0	0	0	0	0	0	0	0	0	0	0	0	0	0
2.74047e+07	4.2168e+07	6.95727e+07		2012	1.28692e+08	-2.27873e+07	-1.70412e+06	2.06544e+07	4.12018e+07	5.72235e+07	6.6947e+07	0	0	0	0	0	0	0	0	0	0	0	0	0	0	0	0	0	0	0	0	0	0	0	0	0	0	0	0	0	0	0	0	0	0	0	0	0	0
3.14519e+07	3.4272e+07	6.57239e+07		2013	1.03979e+08	-1.90751e+07	-1.4758e+06	1.84748e+07	3.79926e+07	5.42721e+07	6.51118e+07	6.90686e+07	0	0	0	0	0	0	0	0	0	0	0	0	0	0	0	0	0	0	0	0	0	0	0	0	0	0	0	0	0	0	0	0	0	0	0	0	0
3.5532e+07	20384000	5.5916e+07		2014	8.09832e+07	-1.54121e+07	-1.23538e+06	1.59995e+07	3.39834e+07	5.00449e+07	6.17535e+07	6.71753e+07	6.52477e+07	0	0	0	0	0	0	0	0	0	0	0	0	0	0	0	0	0	0	0	0	0	0	0	0	0	0	0	0	0	0	0	0	0	0	0	0
3.95193e+07	476000	3.99953e+07		2015	6.0727e+07	-1.20036e+07	-998149	1.33931e+07	2.94302e+07	4.47639e+07	5.69436e+07	6.37106e+07	6.34591e+07	5.55109e+07	0	0	0	0	0	0	0	0	0	0	0	0	0	0	0	0	0	0	0	0	0	0	0	0	0	0	0	0	0	0	0	0	0	0	0
4.31277e+07	-16100000	2.70277e+07		2016	4.37958e+07	-9.00114e+06	-777399	1.08212e+07	2.46359e+07	3.87663e+07	5.09346e+07	5.87483e+07	6.01861e+07	5.39892e+07	3.97056e+07	0	0	0	0	0	0	0	0	0	0	0	0	0	0	0	0	0	0	0	0	0	0	0	0	0	0	0	0	0	0	0	0	0	0
4.59653e+07	7.84e+06	5.38053e+07		2017	3.03463e+07	-6.49155e+06	-582950	8.428e+06	1.9905e+07	3.2451e+07	4.41102e+07	5.25488e+07	5.54982e+07	5.12046e+07	3.86171e+07	2.68319e+07	0	0	0	0	0	0	0	0	0	0	0	0	0	0	0	0	0	0	0	0	0	0	0	0	0	0	0	0	0	0	0	0	0
4.79374e+07	8.162e+07	1.29557e+08		2018	2.0183e+07	-4.49801e+06	-420419	6.31992e+06	1.55028e+07	2.62194e+07	3.69244e+07	4.55082e+07	4.96417e+07	4.72163e+07	3.66254e+07	2.60964e+07	5.34155e+07	0	0	0	0	0	0	0	0	0	0	0	0	0	0	0	0	0	0	0	0	0	0	0	0	0	0	0	0	0	0	0	0
4.98522e+07	2.05268e+08	2.5512e+08		2019	1.28732e+07	-2.99159e+06	-291309	4.55787e+06	1.16251e+07	2.04207e+07	2.98338e+07	3.80946e+07	4.29906e+07	4.22338e+07	3.37727e+07	2.47504e+07	5.19512e+07	1.28619e+08	0	0	0	0	0	0	0	0	0	0	0	0	0	0	0	0	0	0	0	0	0	0	0	0	0	0	0	0	0	0	0
5.3694e+07	3.78728e+08	4.32422e+08		2020	7.86758e+06	-1.90811e+06	-193747	3.15817e+06	8.38395e+06	1.53129e+07	2.32358e+07	3.07793e+07	3.59872e+07	3.65752e+07	3.02088e+07	2.28226e+07	4.92718e+07	1.25093e+08	2.53272e+08	0	0	0	0	0	0	0	0	0	0	0	0	0	0	0	0	0	0	0	0	0	0	0	0	0	0	0	0	0	0
6.26629e+07	5.99676e+08	6.62339e+08		2021	4.60362e+06	-1.16616e+06	-123577	2.10047e+06	5.80927e+06	1.10436e+07	1.74238e+07	2.39721e+07	2.90765e+07	3.06169e+07	2.61613e+07	2.04142e+07	4.54341e+07	1.18641e+08	2.46329e+08	4.29289e+08	0	0	0	0	0	0	0	0	0	0	0	0	0	0	0	0	0	0	0	0	0	0	0	0	0	0	0	0	0
8.10603e+07	858760000	9.3982e+08		2022	2.57708e+06	-682362	-75525	1.33973e+06	3.86369e+06	7.65212e+06	1.25659e+07	1.7976e+07	2.2646e+07	2.47375e+07	2.18995e+07	1.76791e+07	4.06396e+07	1.094e+08	2.33624e+08	4.17521e+08	6.5754e+08	0	0	0	0	0	0	0	0	0	0	0	0	0	0	0	0	0	0	0	0	0	0	0	0	0	0	0	0
1.13996e+08	1153544000	1.26754e+09		2023	1.37915e+06	-381983	-44192.5	818787	2.46436e+06	5.08936e+06	8.70698e+06	1.29642e+07	1.69816e+07	1.92665e+07	1.76941e+07	1.47991e+07	3.51946e+07	9.78556e+07	2.15427e+08	3.95987e+08	6.39515e+08	9.33011e+08	0	0	0	0	0	0	0	0	0	0	0	0	0	0	0	0	0	0	0	0	0	0	0	0	0	0	0
1.66989e+08	1484112000	1.6511e+09		2024	705096	-204422	-24738.8	479103	1.50611e+06	3.24612e+06	5.79093e+06	8.98292e+06	1.2247e+07	1.44475e+07	1.37809e+07	1.19572e+07	2.94612e+07	8.47447e+07	1.92694e+08	3.65144e+08	6.06531e+08	9.07435e+08	1.25836e+09	0	0	0	0	0	0	0	0	0	0	0	0	0	0	0	0	0	0	0	0	0	0	0	0	0	0
2.45649e+08	1.85044e+09	2.09608e+09		2025	344146	-104511	-13239.2	268200	881282	1.98389e+06	3.6936e+06	5.97446e+06	8.48597e+06	1.04194e+07	1.03339e+07	9.31273e+06	2.38037e+07	7.09393e+07	1.66876e+08	3.26612e+08	5.59289e+08	8.60632e+08	1.22386e+09	1.63914e+09	0	0	0	0	0	0	0	0	0	0	0	0	0	0	0	0	0	0	0	0	0	0	0	0	0
3.5544e+08	2.2409e+09	2.59634e+09		2026	160256	-51010.3	-6768.58	143530	493338	1.16085e+06	2.25737e+06	3.81065e+06	5.64394e+06	7.21962e+06	7.45273e+06	6.98336e+06	1.85393e+07	5.73167e+07	1.39691e+08	2.82851e+08	5.0027e+08	7.93599e+08	1.16074e+09	1.5942e+09	2.0809e+09	0	0	0	0	0	0	0	0	0	0	0	0	0	0	0	0	0	0	0	0	0	0	0	0
5.01461e+08	2.60932e+09	3.11078e+09		2027	71153.4	-23753.7	-3303.63	73380	264015	649838	1.32087e+06	2.32891e+06	3.59984e+06	4.80171e+06	5.16402e+06	5.03634e+06	1.39021e+07	4.46406e+07	1.12866e+08	2.36773e+08	4.33242e+08	7.09853e+08	1.07033e+09	1.51198e+09	2.02385e+09	2.57752e+09	0	0	0	0	0	0	0	0	0	0	0	0	0	0	0	0	0	0	0	0	0	0	0
6.87907e+08	2.94409e+09	3.632e+09		2028	30103.9	-10546.6	-1538.38	35815.6	134978	347768	739419	1.36273e+06	2.20007e+06	3.06265e+06	3.43454e+06	3.4897e+06	1.00261e+07	3.34747e+07	8.79048e+07	1.91305e+08	3.62665e+08	6.14745e+08	9.57382e+08	1.39422e+09	1.91947e+09	2.50687e+09	3.08824e+09	0	0	0	0	0	0	0	0	0	0	0	0	0	0	0	0	0	0	0	0	0	0
9.17398e+08	3245256000	4.16265e+09		2029	12129.5	-4462.09	-683.038	16678	65880.8	177797	395708	762853	1.28735e+06	1.87176e+06	2.19063e+06	2.32097e+06	6.9471e+06	2.41417e+07	6.59174e+07	1.48996e+08	2.93021e+08	5.146e+08	8.29109e+08	1.24709e+09	1.76997e+09	2.37757e+09	3.00358e+09	3.60568e+09	0	0	0	0	0	0	0	0	0	0	0	0	0	0	0	0	0	0	0	0	0
1.19077e+09	3512768000	4.70354e+09		2030	4651.7	-1797.87	-288.983	7405.01	30678.3	86779.9	202307	408249	720651	1.09524e+06	1.33882e+06	1.48037e+06	4.62046e+06	1.67279e+07	4.75391e+07	1.11728e+08	2.28217e+08	4.1578e+08	6.94043e+08	1.08e+09	1.58319e+09	2.19239e+09	2.84867e+09	3.50684e+09	4.13249e+09	0	0	0	0	0	0	0	0	0	0	0	0	0	0	0	0	0	0	0	0
1.50718e+09	3.74352e+09	5.2507e+09		2031	1697.04	-689.489	-116.437	3132.94	13621.1	40410.3	98742.6	208718	385664	613109	783396	904740	2.94704e+06	1.11256e+07	3.294e+07	8.05775e+07	1.71134e+08	3.23827e+08	5.60765e+08	9.04063e+08	1.37107e+09	1.96103e+09	2.62679e+09	3.32597e+09	4.01921e+09	4.66946e+09	0	0	0	0	0	0	0	0	0	0	0	0	0	0	0	0	0	0	0
1.86437e+09	3.92524e+09	5.7896e+09		2032	588.643	-251.54	-44.6541	1262.33	5762.87	17942.1	45980.9	101872	197172	328112	438542	529397	1.80111e+06	7.09615e+06	2.19081e+07	5.58324e+07	1.2342e+08	2.42829e+08	4.36746e+08	7.30454e+08	1.14771e+09	1.69829e+09	2.3496e+09	3.06691e+09	3.81191e+09	4.54146e+09	5.21266e+09	0	0	0	0	0	0	0	0	0	0	0	0	0	0	0	0	0	0
2.25881e+09	4054736000	6.31354e+09		2033	194.03	-87.2504	-16.2908	484.107	2321.98	7591.01	20415.4	47438.1	96236.2	167748	234690	296354	1.05389e+06	4.33687e+06	1.39735e+07	3.71336e+07	8.55182e+07	1.75126e+08	3.27504e+08	5.68907e+08	9.27316e+08	1.42163e+09	2.03479e+09	2.74327e+09	3.51501e+09	4.30722e+09	5.06976e+09	5.74766e+09	0	0	0	0	0	0	0	0	0	0	0	0	0	0	0	0	0
2.68592e+09	4132044000	6.81796e+09		2034	60.7466	-28.7597	-5.65069	176.613	890.488	3058.58	8637.43	21062.4	44813.8	81875.1	119986	158597	589966	2.53766e+06	8.54002e+06	2.36847e+07	5.68774e+07	1.21345e+08	2.36193e+08	4.26608e+08	7.22232e+08	1.14863e+09	1.70331e+09	2.37572e+09	3.14408e+09	3.97174e+09	4.80828e+09	5.5901e+09	6.2678e+09	0	0	0	0	0	0	0	0	0	0	0	0	0	0	0	0
3.14029e+09	4157216000	7.29751e+09		2035	18.0551	-9.00404	-1.86259	61.2607	324.869	1172.97	3480.21	8911.17	19897.2	38126.3	58563.2	81083.2	315727	1.42057e+06	4.99709e+06	1.44751e+07	3.62778e+07	8.07057e+07	1.63659e+08	3.07666e+08	5.41582e+08	8.946e+08	1.37622e+09	1.9887e+09	2.72283e+09	3.55262e+09	4.43377e+09	5.30178e+09	6.09598e+09	6.76856e+09	0	0	0	0	0	0	0	0	0	0	0	0	0	0	0
3.61599e+09	4134508000	7.7505e+09		2036	5.09209	-2.67618	-0.583137	20.1929	112.686	427.926	1334.67	3590.5	8418.19	16928	27270.8	39575.4	161416	760235	2.79735e+06	8.46993e+06	2.21715e+07	5.14761e+07	1.08848e+08	2.13183e+08	3.90584e+08	6.70836e+08	1.07186e+09	1.60681e+09	2.27927e+09	3.07663e+09	3.96589e+09	4.88883e+09	5.78157e+09	6.58302e+09	7.24464e+09	0	0	0	0	0	0	0	0	0	0	0	0	0	0
4.10676e+09	4081308000	8.18807e+09		2037	1.36209	-0.754764	-0.17332	6.32195	37.1436	148.432	486.916	1376.97	3391.87	7161.96	12108.2	18428.8	78784.5	388672	1.49703e+06	4.74143e+06	1.29734e+07	3.146e+07	6.9426e+07	1.41786e+08	2.70637e+08	4.83801e+08	8.03757e+08	1.25145e+09	1.84158e+09	2.57543e+09	3.43453e+09	4.37293e+09	5.33125e+09	6.24349e+09	7.04604e+09	7.69435e+09	0	0	0	0	0	0	0	0	0	0	0	0	0
4.60643e+09	4.00193e+09	8.60836e+09		2038	0.345409	-0.201893	-0.0488815	1.87901	11.6289	48.9266	168.894	502.347	1300.79	2885.71	5122.77	8182.35	36687.1	189705	765360	2.53743e+06	7.26243e+06	1.84084e+07	4.24303e+07	9.04345e+07	1.79998e+08	3.35227e+08	5.79663e+08	9.38427e+08	1.43429e+09	2.08086e+09	2.87503e+09	3.78703e+09	4.76867e+09	5.75719e+09	6.68263e+09	7.48342e+09	8.12875e+09	0	0	0	0	0	0	0	0	0	0	0	0
5.10924e+09	3.8964e+09	9.00563e+09		2039	0.0830015	-0.0511976	-0.0130754	0.529938	3.45634	15.3179	55.6711	174.247	474.557	1106.68	2064.07	3461.83	16289	88338.6	373560	1.29727e+06	3.88657e+06	1.0305e+07	2.48275e+07	5.52698e+07	1.14807e+08	2.22957e+08	4.0165e+08	6.76786e+08	1.07554e+09	1.62066e+09	2.32293e+09	3.17011e+09	4.12975e+09	5.14966e+09	6.16213e+09	7.09745e+09	7.90592e+09	8.54599e+09	0	0	0	0	0	0	0	0	0	0	0
5.61004e+09	3764684000	9.37472e+09		2040	0.0188918	-0.0123027	-0.00331576	0.141754	0.974792	4.55278	17.4295	57.4355	164.607	403.739	791.579	1394.84	6891.61	39222.1	173953	633175	1.98702e+06	5.51481e+06	1.38983e+07	3.23404e+07	7.01654e+07	1.42207e+08	2.67134e+08	4.68947e+08	7.75668e+08	1.21529e+09	1.80919e+09	2.56135e+09	3.45699e+09	4.45969e+09	5.51186e+09	6.54464e+09	7.49816e+09	8.31172e+09	8.94038e+09	0	0	0	0	0	0	0	0	0	0
6.10431e+09	3.6094e+09	9.71371e+09		2041	0.00407108	-0.00280019	-0.000796773	0.0359471	0.260749	1.28402	5.18039	17.9818	54.2581	140.043	288.785	534.927	2776.78	16594.3	77234.9	294847	969831	2.81946e+06	7.43785e+06	1.8104e+07	4.10564e+07	8.69111e+07	1.70384e+08	3.11892e+08	5.37463e+08	8.76457e+08	1.35666e+09	1.99488e+09	2.79314e+09	3.73318e+09	4.77337e+09	5.85401e+09	6.91414e+09	7.88303e+09	8.6953e+09	9.3068e+09	0	0	0	0	0	0	0	0	0
6.58812e+09	3.44098e+09	1.00291e+10		2042	0.000830252	-0.000603427	-0.000181352	0.00863804	0.0661226	0.343465	1.46103	5.34456	16.987	46.1612	100.169	195.153	1064.9	6686.18	32676.9	130911	451615	1.37613e+06	3.80262e+06	9.68857e+06	2.29832e+07	5.08549e+07	1.04132e+08	1.98933e+08	3.57462e+08	6.07299e+08	9.78415e+08	1.49591e+09	2.17541e+09	3.01629e+09	3.99576e+09	5.06967e+09	6.18451e+09	7.26903e+09	8.24683e+09	9.05168e+09	9.64333e+09	0	0	0	0	0	0	0	0
7.05808e+09	3262056000	1.03201e+10		2043	0.00016019	-0.000123062	-3.90803e-05	0.00196608	0.0158892	0.0870985	0.390812	1.50733	5.04889	14.4521	33.018	67.6916	388.499	2564.17	13166.2	55386.5	200516	640816	1.856e+06	4.9533e+06	1.22997e+07	2.84684e+07	6.09314e+07	1.21579e+08	2.27998e+08	4.03909e+08	6.77947e+08	1.07883e+09	1.63128e+09	2.34921e+09	3.22845e+09	4.2438e+09	5.35589e+09	6.50196e+09	7.6045e+09	8.58482e+09	9.37898e+09	9.95643e+09	0	0	0	0	0	0	0
7.51144e+09	3072552000	1.0584e+10		2044	2.9225e-05	-2.37438e-05	-7.97002e-06	0.000423681	0.0036165	0.0209297	0.0991051	0.403198	1.42394	4.29546	10.3372	22.3126	134.757	935.464	5049.28	22316.4	84835.2	284521	864271	2.41763e+06	6.28825e+06	1.52352e+07	3.41092e+07	7.11406e+07	1.39343e+08	2.57623e+08	4.50896e+08	7.47528e+08	1.17647e+09	1.76161e+09	2.51445e+09	3.42885e+09	4.48339e+09	5.63081e+09	6.80202e+09	7.91616e+09	8.89525e+09	9.6835e+09	1.02454e+10	0	0	0	0	0	0
7.94595e+09	2.87258e+09	1.08185e+10		2045	5.0361e-06	-4.33182e-06	-1.53774e-06	8.64052e-05	0.000779337	0.00476375	0.0238148	0.102246	0.380893	1.21145	3.07243	6.98561	44.4188	324.479	1842.09	8558.41	34181.9	120376	383734	1.1258e+06	3.06919e+06	7.78901e+06	1.82539e+07	3.98242e+07	8.15347e+07	1.57449e+08	2.87593e+08	4.97174e+08	8.15176e+08	1.27046e+09	1.88551e+09	2.67053e+09	3.62244e+09	4.71352e+09	5.89067e+09	7.0808e+09	8.20241e+09	9.18406e+09	9.96451e+09	1.05073e+10	0	0	0	0	0
8.35981e+09	2.66204e+09	1.10219e+10		2046	8.08908e-07	-7.46466e-07	-2.80546e-07	1.66711e-05	0.000158937	0.00102656	0.00542043	0.0245696	0.0965896	0.324053	0.866519	2.07626	13.9066	106.956	638.954	3122.29	13108.9	48502.1	162352	499853	1.42921e+06	3.80169e+06	9.33234e+06	2.13123e+07	4.56428e+07	9.21291e+07	1.75765e+08	3.1711e+08	5.42166e+08	8.80304e+08	1.35982e+09	2.00256e+09	2.8213e+09	3.80837e+09	4.93105e+09	6.13209e+09	7.33684e+09	8.46872e+09	9.45058e+09	1.02193e+10	1.07401e+10	0	0	0	0
8.75148e+09	2440956000	1.11924e+10		2047	0	-1.19899e-07	-4.83441e-08	3.04148e-06	3.06656e-05	0.000209357	0.00116808	0.00559222	0.0232104	0.0821757	0.231787	0.585569	4.13331	33.4855	210.613	1083.01	4782.39	18600.7	65415	211480	634567	1.77031e+06	4.55496e+06	1.0896e+07	2.44262e+07	5.15735e+07	1.02846e+08	1.93804e+08	3.45807e+08	5.85483e+08	9.42222e+08	1.44423e+09	2.11562e+09	2.96612e+09	3.98413e+09	5.13314e+09	6.35383e+09	7.57505e+09	8.71448e+09	9.6922e+09	1.04457e+10	1.0942e+10	0	0	0
9.11965e+09	2209396000	1.1329e+10		2048	0	0	-7.76512e-09	5.24112e-07	5.59463e-06	4.03935e-05	0.000238217	0.00120509	0.00528285	0.0197467	0.0587782	0.156635	1.16572	9.95257	65.9386	356.984	1658.84	6785.94	25086.9	85209.8	268475	786013	2.12108e+06	5.31815e+06	1.2488e+07	2.76001e+07	5.7573e+07	1.13402e+08	2.11343e+08	3.73435e+08	6.26663e+08	1.00071e+09	1.52576e+09	2.22421e+09	3.103e+09	4.14742e+09	5.31876e+09	6.56012e+09	7.79488e+09	8.93729e+09	9.90697e+09	1.0642e+10	1.11113e+10	0	0
9.46308e+09	1967252000	1.14303e+10		2049	0	0	0	8.41838e-08	9.64074e-07	7.3694e-06	4.59618e-05	0.000245766	0.00113843	0.0044945	0.0141243	0.0397207	0.311821	2.80693	19.5983	111.764	546.791	2353.8	9152.22	32678.2	108174	332550	941756	2.47647e+06	6.09517e+06	1.41106e+07	3.08108e+07	6.3482e+07	1.23665e+08	2.28228e+08	3.99701e+08	6.65563e+08	1.05721e+09	1.60408e+09	2.32686e+09	3.23018e+09	4.29739e+09	5.49144e+09	6.7505e+09	7.99417e+09	9.13533e+09	1.00932e+10	1.08068e+10	1.1247e+10	0
9.78061e+09	1714608000	1.14952e+10		2050	0	0	0	0	1.54851e-07	1.2699e-06	8.38527e-06	4.74184e-05	0.00023217	0.000968542	0.0032148	0.00954483	0.0790738	0.75083	5.52731	33.2186	171.189	775.865	3174.58	11921.7	41485.3	133991	398442	1.09955e+06	2.8383e+06	6.88716e+06	1.57521e+07	3.39731e+07	6.92269e+07	1.33545e+08	2.44281e+08	4.24512e+08	7.03139e+08	1.11147e+09	1.67811e+09	2.42222e+09	3.34698e+09	4.43691e+09	5.65081e+09	6.92309e+09	8.17132e+09	9.30702e+09	1.02494e+10	1.09387e+10	1.13475e+10
[truncated: 1 more columns]

[truncated: 8 more sheets: SI2.9 - Battery_inflow_2.0, SI2.10 - Battery_inflow_1.5, SI2.11 - Nickel_inflow, SI2.12 - Nickel_outflow_NDC, SI2.13 - Nickel_outlfow_2.0, SI2.4 - Nickel_outflow_1.5, SI 2.15 - Scaling_of_LCIs, References]
