# Supplementary material for: Scenario-based Inventory Modelling for Prospective Life Cycle Assessment of Mineral Raw Materials (SIMPL-Minerals)
Source: Research Square preprint supplement (doi:10.21203/rs.3.rs-8222189/v1), 2025-11-28
Supplement: Supplementary file 2 [file 478ebda0d8e4750256a4ddfe.xlsx]

## Sheet: Title_page
International Journal of Life Cycle Assessment
Scenario-based Inventory Modelling for Prospective Life Cycle Assessment of Mineral Raw Materials (SIMPL-Minerals)
Jonas Klimt (1),*, Robert Istrate (1), Valerio Barbarossa (1), Antoine Beylot (2), Frederic Lai (2), Bernhard Steubing (1)
1 Institute of Environmental Sciences (CML), Leiden University, 2333 CC Leiden, The Netherlands
2 BRGM, F-45060 Orléans, France
* Correspondence: j.b.j.klimt@cml.leidenuniv.nl
Supplementary Information 5
Sheets	Content
SI 5 - Impact results EFV3.1	Relative impact category results with consecutive consideration of parameter application (exported from ActivityBrowser). Absolute impact categroy results (calculated using demand projections from SI 2) Data for Figure 8 in manuscript.

## Sheet: SI 5 - Impact results EFv3.1
method	EF v3.1, eutrophication: freshwater, fraction of nutrients reaching freshwater end compartment (P)				EF v3.1, ionising radiation: human health, human exposure efficiency relative to u235				EF v3.1, energy resources: non-renewable, abiotic depletion potential (ADP): fossil fuels				EF v3.1, human toxicity: non-carcinogenic, organics, comparative toxic unit for human (CTUh)				EF v3.1, material resources: metals/minerals, abiotic depletion potential (ADP): elements (ultimate reserves)				EF v3.1, human toxicity: carcinogenic, inorganics, comparative toxic unit for human (CTUh)				EF v3.1, climate change: land use and land use change, global warming potential (GWP100)				EF v3.1, photochemical oxidant formation: human health, tropospheric ozone concentration increase				EF v3.1, human toxicity: carcinogenic, comparative toxic unit for human (CTUh)				EF v3.1, ecotoxicity: freshwater, organics, comparative toxic unit for ecosystems (CTUe)				EF v3.1, land use, soil quality index				EF v3.1, climate change, global warming potential (GWP100)				EF v3.1, water use, user deprivation potential (deprivation-weighted water consumption)
scenario	remind - SSP2-NDC - 2025	remind - SSP2-NDC - 2050	remind - SSP2-PkBudg1150 - 2050	remind - SSP2-PkBudg500 - 2050	remind - SSP2-NDC - 2025	remind - SSP2-NDC - 2050	remind - SSP2-PkBudg1150 - 2050	remind - SSP2-PkBudg500 - 2050	remind - SSP2-NDC - 2025	remind - SSP2-NDC - 2050	remind - SSP2-PkBudg1150 - 2050	remind - SSP2-PkBudg500 - 2050	remind - SSP2-NDC - 2025	remind - SSP2-NDC - 2050	remind - SSP2-PkBudg1150 - 2050	remind - SSP2-PkBudg500 - 2050	remind - SSP2-NDC - 2025	remind - SSP2-NDC - 2050	remind - SSP2-PkBudg1150 - 2050	remind - SSP2-PkBudg500 - 2050	remind - SSP2-NDC - 2025	remind - SSP2-NDC - 2050	remind - SSP2-PkBudg1150 - 2050	remind - SSP2-PkBudg500 - 2050	remind - SSP2-NDC - 2025	remind - SSP2-NDC - 2050	remind - SSP2-PkBudg1150 - 2050	remind - SSP2-PkBudg500 - 2050	remind - SSP2-NDC - 2025	remind - SSP2-NDC - 2050	remind - SSP2-PkBudg1150 - 2050	remind - SSP2-PkBudg500 - 2050	remind - SSP2-NDC - 2025	remind - SSP2-NDC - 2050	remind - SSP2-PkBudg1150 - 2050	remind - SSP2-PkBudg500 - 2050	remind - SSP2-NDC - 2025	remind - SSP2-NDC - 2050	remind - SSP2-PkBudg1150 - 2050	remind - SSP2-PkBudg500 - 2050	remind - SSP2-NDC - 2025	remind - SSP2-NDC - 2050	remind - SSP2-PkBudg1150 - 2050	remind - SSP2-PkBudg500 - 2050	remind - SSP2-NDC - 2025	remind - SSP2-NDC - 2050	remind - SSP2-PkBudg1150 - 2050	remind - SSP2-PkBudg500 - 2050	remind - SSP2-NDC - 2025
		NDC	<2°C	<1.5°C		NDC	<2°C	<1.5°C		NDC	<2°C	<1.5°C		NDC	<2°C	<1.5°C		NDC	<2°C	<1.5°C		NDC	<2°C	<1.5°C		NDC	<2°C	<1.5°C		NDC	<2°C	<1.5°C		NDC	<2°C	<1.5°C		NDC	<2°C	<1.5°C		NDC	<2°C	<1.5°C		NDC	<2°C	<1.5°C
2025	0.00259082	0.00259082	0.00259082	0.00259082	0.391552	0.391552	0.391552	0.391552	77.9818	77.9818	77.9818	77.9818	8.38339e-09	8.38339e-09	8.38339e-09	8.38339e-09	0.000367223	0.000367223	0.000367223	0.000367223	1.04206e-08	1.04206e-08	1.04206e-08	1.04206e-08	0.00835307	0.00835307	0.00835307	0.00835307	0.0209825	0.0209825	0.0209825	0.0209825	3.45669e-08	3.45669e-08	3.45669e-08	3.45669e-08	5.59332	5.59332	5.59332	5.59332	54.2058	54.2058	54.2058	54.2058	7.92597	7.92597	7.92597	7.92597	2.598
background	0.00259082	0.0010215	0.000994892	0.00101135	0.391552	0.316164	0.320571	0.456302	77.9818	36.8797	36.4289	35.6548	8.38339e-09	7.96611e-09	7.97598e-09	8.05898e-09	0.000367223	0.000380194	0.000380667	0.000383577	1.04206e-08	1.02611e-08	1.02701e-08	1.02972e-08	0.00835307	0.00450373	0.00424525	0.00465707	0.0209825	0.0145029	0.0144537	0.0142594	3.45669e-08	3.37893e-08	3.35385e-08	3.28347e-08	5.59332	5.52467	5.46598	5.33594	54.2058	68.0867	67.933	78.7378	7.92597	3.60229	3.55294	3.34583	2.598
ore grade	0.00259082	0.00140928	0.00142436	0.0014551	0.391552	0.36328	0.37049	0.538955	77.9818	41.4082	41.3174	39.4736	8.38339e-09	8.26015e-09	8.30432e-09	8.4571e-09	0.000367223	0.000598866	0.000631718	0.000636968	1.04206e-08	2.07859e-08	2.23562e-08	2.23996e-08	0.00835307	0.00837583	0.00831289	0.00908984	0.0209825	0.0209298	0.0217977	0.0215251	3.45669e-08	4.68404e-08	4.84099e-08	4.77171e-08	5.59332	6.18613	6.19509	6.11191	54.2058	123.859	132.972	151.16	7.92597	3.90101	3.87712	3.55634	2.598
mine electrification	0.00259082	0.00140489	0.00141714	0.00142244	0.391552	0.366859	0.378831	0.546252	77.9818	40.045	38.4079	36.525	8.38339e-09	8.21109e-09	8.2118e-09	8.20244e-09	0.000367223	0.000598572	0.000631463	0.000633077	1.04206e-08	2.07792e-08	2.23438e-08	2.23571e-08	0.00835307	0.00862985	0.00889856	0.00930613	0.0209825	0.0187699	0.0171239	0.0138392	3.45669e-08	4.63993e-08	4.75142e-08	4.60065e-08	5.59332	6.06206	5.94745	5.5863	54.2058	123.407	130.649	136.434	7.92597	3.79095	3.64317	3.31537	2.598
electrification of equipment	0.00259082	0.0014115	0.00142548	0.00143663	0.391552	0.393226	0.432531	0.67259	77.9818	39.0712	36.3538	33.5815	8.38339e-09	8.22115e-09	8.23293e-09	8.23877e-09	0.000367223	0.00059954	0.000633452	0.000636369	1.04206e-08	2.07841e-08	2.23544e-08	2.23754e-08	0.00835307	0.00872849	0.00908505	0.00960706	0.0209825	0.0186654	0.0169069	0.0134725	3.45669e-08	4.65961e-08	4.79066e-08	4.65753e-08	5.59332	6.10793	6.03928	5.72108	54.2058	124.698	133.23	140.822	7.92597	3.70028	3.45187	2.98723	2.598
HPGR adoption	0.00259082	0.00140976	0.00142276	0.00143296	0.391552	0.389299	0.426911	0.661913	77.9818	38.9502	36.1957	33.3619	8.38339e-09	8.21122e-09	8.21728e-09	8.21778e-09	0.000367223	0.000599138	0.000632819	0.000635534	1.04206e-08	2.0782e-08	2.23509e-08	2.23706e-08	0.00835307	0.00839835	0.00861541	0.00901824	0.0209825	0.0186475	0.0168812	0.0134408	3.45669e-08	4.64889e-08	4.77475e-08	4.63847e-08	5.59332	6.0819	6.00024	5.67339	54.2058	124.162	132.414	139.713	7.92597	3.69563	3.44612	2.9823	2.598
recovery efficiency	0.00259082	0.00140976	0.00141331	0.00141493	0.391552	0.389299	0.426674	0.661289	77.9818	38.9502	36.183	33.3486	8.38339e-09	8.21122e-09	8.21637e-09	8.21635e-09	0.000367223	0.000599138	0.000631725	0.000633423	1.04206e-08	2.0782e-08	2.23491e-08	2.23673e-08	0.00835307	0.00839835	0.00858928	0.00897182	0.0209825	0.0186475	0.0168616	0.0134211	3.45669e-08	4.64889e-08	4.77373e-08	4.63697e-08	5.59332	6.0819	5.99805	5.67037	54.2058	124.162	132.159	139.23	7.92597	3.69563	3.44534	2.98187	2.598
energy efficiency	0.00259082	0.00140976	0.00141046	0.00140033	0.391552	0.389299	0.419741	0.608491	77.9818	38.9502	35.591	30.6828	8.38339e-09	8.21122e-09	8.203e-09	8.15543e-09	0.000367223	0.000599138	0.000631386	0.000631632	1.04206e-08	2.0782e-08	2.23465e-08	2.23539e-08	0.00835307	0.00839835	0.00851613	0.00853654	0.0209825	0.0186475	0.016725	0.0131521	3.45669e-08	4.64889e-08	4.75931e-08	4.57733e-08	5.59332	6.0819	5.95961	5.50943	54.2058	124.162	131.688	136.814	7.92597	3.69563	3.41179	2.85535	2.598
material efficiency	0.00259082	0.00140976	0.00139097	0.00129742	0.391552	0.389299	0.418954	0.603164	77.9818	38.9502	35.3901	29.7225	8.38339e-09	8.21122e-09	8.02124e-09	7.1977e-09	0.000367223	0.000599138	0.000626672	0.000606743	1.04206e-08	2.0782e-08	2.22849e-08	2.2029e-08	0.00835307	0.00839835	0.00849664	0.0084175	0.0209825	0.0186475	0.0164672	0.0118095	3.45669e-08	4.64889e-08	4.72797e-08	4.41576e-08	5.59332	6.0819	5.89141	5.15797	54.2058	124.162	131.371	134.522	7.92597	3.69563	3.36766	2.63133	2.598
hydrogen as reductant	0.00259082	0.00141802	0.00140714	0.00130566	0.391552	0.403399	0.454626	0.63843	77.9818	38.2988	33.7923	27.3329	8.38339e-09	8.26547e-09	8.15176e-09	7.28643e-09	0.000367223	0.000600841	0.000630838	0.000609887	1.04206e-08	2.07919e-08	2.23098e-08	2.20475e-08	0.00835307	0.00844717	0.00859572	0.0085904	0.0209825	0.0186011	0.0163854	0.0116303	3.45669e-08	4.65969e-08	4.75589e-08	4.43198e-08	5.59332	6.13144	6.01719	5.23454	54.2058	124.928	133.796	149.653	7.92597	3.63552	3.21136	2.41988	2.598
secondary market	0.00259082	0.000492698	0.000421823	0.000350549	0.391552	0.157231	0.152712	0.178524	77.9818	14.2697	11.4603	8.69236	8.38339e-09	3.01705e-09	2.6379e-09	2.19338e-09	0.000367223	0.000178799	0.000156454	0.00012631	1.04206e-08	5.59632e-09	4.88105e-09	3.85457e-09	0.00835307	0.00341665	0.00304346	0.00290613	0.0209825	0.00647694	0.00513241	0.0036171	3.45669e-08	2.94725e-08	2.83412e-08	2.62632e-08	5.59332	2.82274	2.53943	2.13169	54.2058	39.8874	35.5005	34.7384	7.92597	1.25142	0.979652	0.679871	2.598
production pathways	0.00259082	0.000456576	0.000582439	0.000477903	0.391552	0.112125	0.0948397	0.11081	77.9818	10.4052	8.10237	6.46209	8.38339e-09	3.28851e-09	2.90851e-09	2.42981e-09	0.000367223	0.000182023	0.000157114	0.000126244	1.04206e-08	7.16979e-09	6.48291e-09	5.06767e-09	0.00835307	0.0032901	0.00320143	0.00292863	0.0209825	0.00633446	0.00498864	0.00358577	3.45669e-08	2.67831e-08	2.3552e-08	2.07598e-08	5.59332	2.59703	2.64035	2.22781	54.2058	37.3658	31.9854	29.4496	7.92597	1.11346	0.884237	0.656038	2.598
2050
changes absolute
background	0	0.00156932	0.00159593	0.00157947	0	0.0753879	0.0709803	-0.0647503	0	41.1021	41.5529	42.327	0	4.17286e-10	4.07417e-10	3.24416e-10	0	-1.29702e-05	-1.34436e-05	-1.63532e-05	0	1.59536e-10	1.50492e-10	1.23433e-10	0	0.00384934	0.00410782	0.003696	0	0.00647956	0.00652872	0.00672307	0	7.7762e-10	1.02841e-09	1.73214e-09	0	0.0686465	0.127339	0.257378	0	-13.8809	-13.7272	-24.5321	0	4.32368	4.37303	4.58014	0
ore grade	0	-0.000387778	-0.000429467	-0.000443754	0	-0.0471158	-0.0499192	-0.0826528	0	-4.52847	-4.88849	-3.81889	0	-2.94036e-10	-3.28343e-10	-3.98119e-10	0	-0.000218673	-0.000251051	-0.000253392	0	-1.05248e-08	-1.20861e-08	-1.21024e-08	0	-0.0038721	-0.00406764	-0.00443278	0	-0.00642689	-0.00734392	-0.00726569	0	-1.30512e-08	-1.48714e-08	-1.48824e-08	0	-0.661459	-0.729116	-0.775972	0	-55.7719	-65.0387	-72.4224	0	-0.298721	-0.32418	-0.210518	0
mine electrification	0	4.38341e-06	7.22245e-06	3.26658e-05	0	-0.00357949	-0.00834053	-0.00729747	0	1.36317	2.90947	2.94865	0	4.90543e-11	9.25204e-11	2.54659e-10	0	2.94329e-07	2.54834e-07	3.89146e-06	0	6.68206e-12	1.24342e-11	4.24956e-11	0	-0.000254019	-0.000585673	-0.000216285	0	0.00215992	0.00467381	0.00768588	0	4.41139e-10	8.95701e-10	1.71062e-09	0	0.124066	0.247645	0.525613	0	0.451911	2.32266	14.7258	0	0.110055	0.233951	0.240973	0
electrification of equipment	0	-6.60156e-06	-8.34236e-06	-1.41945e-05	0	-0.0263668	-0.0537004	-0.126338	0	0.973803	2.05412	2.94346	0	-1.0061e-11	-2.1125e-11	-3.6329e-11	0	-9.68324e-07	-1.98902e-06	-3.29189e-06	0	-4.92281e-12	-1.05628e-11	-1.83259e-11	0	-9.86416e-05	-0.000186495	-0.00030093	0	0.00010451	0.000217001	0.000366653	0	-1.96761e-10	-3.92384e-10	-5.68759e-10	0	-0.0458637	-0.0918336	-0.134778	0	-1.29181	-2.58087	-4.38741	0	0.0906716	0.191298	0.328136	0
HPGR adoption	0	1.73177e-06	2.71857e-06	3.67264e-06	0	0.00392668	0.00562029	0.010677	0	0.120969	0.158075	0.219661	0	9.92746e-12	1.56445e-11	2.09881e-11	0	4.02074e-07	6.33281e-07	8.354e-07	0	2.14635e-12	3.47425e-12	4.77436e-12	0	0.000330145	0.000469648	0.000588817	0	1.784e-05	2.56379e-05	3.17171e-05	0	1.07126e-10	1.5904e-10	1.90515e-10	0	0.0260298	0.0390446	0.0476906	0	0.536685	0.815784	1.10901	0	0.00464953	0.0057533	0.00493685	0
recovery efficiency	0	0	9.45419e-06	1.80252e-05	0	0	0.000237484	0.000624019	0	0	0.012706	0.0132358	0	0	9.12285e-13	1.43062e-12	0	0	1.09388e-06	2.11042e-06	0	0	1.74521e-12	3.2976e-12	0	0	2.61283e-05	4.64206e-05	0	0	1.95796e-05	1.97316e-05	0	0	1.02807e-11	1.50078e-11	0	0	0.00219193	0.00301517	0	0	0.255182	0.483202	0	0	0.000772193	0.000430201	0
energy efficiency	0	0	2.84932e-06	1.46004e-05	0	0	0.00693213	0.0527975	0	0	0.59202	2.6658	0	0	1.33663e-11	6.09207e-11	0	0	3.3887e-07	1.79097e-06	0	0	2.67888e-12	1.34745e-11	0	0	7.31515e-05	0.000435276	0	0	0.000136598	0.000269032	0	0	1.44128e-10	5.96398e-10	0	0	0.0384383	0.160945	0	0	0.47042	2.41556	0	0	0.0335553	0.126512	0
material efficiency	0	0	1.9483e-05	0.000102918	0	0	0.000787414	0.00532785	0	0	0.200863	0.960345	0	0	1.81762e-10	9.57733e-10	0	0	4.71414e-06	2.48894e-05	0	0	6.16006e-11	3.24836e-10	0	0	1.94917e-05	0.000119043	0	0	0.000257801	0.00134253	0	0	3.13455e-10	1.61574e-09	0	0	0.0681952	0.351456	0	0	0.317578	2.29197	0	0	0.0441242	0.224022	0
hydrogen as reductant	0	-8.25956e-06	-1.61695e-05	-8.2446e-06	0	-0.0140996	-0.0356717	-0.0352669	0	0.651419	1.59779	2.3896	0	-5.42466e-11	-1.30515e-10	-8.87371e-11	0	-1.70326e-06	-4.16571e-06	-3.14402e-06	0	-9.89013e-12	-2.4945e-11	-1.84776e-11	0	-4.88253e-05	-9.90893e-05	-0.000172897	0	4.63884e-05	8.18824e-05	0.000179256	0	-1.07989e-10	-2.79236e-10	-1.62239e-10	0	-0.0495409	-0.125778	-0.0765751	0	-0.766692	-2.42513	-15.131	0	0.0601113	0.156302	0.211449	0
secondary market	0	0.000925324	0.000985321	0.000955111	0	0.246168	0.301913	0.459906	0	24.0291	22.332	18.6405	0	5.24842e-09	5.51386e-09	5.09306e-09	0	0.000422042	0.000474384	0.000483577	0	1.51956e-08	1.74288e-08	1.81929e-08	0	0.00503052	0.00555226	0.00568427	0	0.0121242	0.0112529	0.00801317	0	1.71244e-08	1.92177e-08	1.80567e-08	0	3.3087	3.47776	3.10285	0	85.0411	98.2956	114.915	0	2.3841	2.23171	1.74001	0
production pathways	0	3.6122e-05	-0.000160616	-0.000127354	0	0.045106	0.0578727	0.0677144	0	3.86454	3.35793	2.23027	0	-2.71456e-10	-2.70607e-10	-2.36433e-10	0	-3.22339e-06	-6.60567e-07	6.57223e-08	0	-1.57347e-09	-1.60186e-09	-1.2131e-09	0	0.000126551	-0.000157966	-2.25084e-05	0	0.00014248	0.000143764	3.133e-05	0	2.68943e-09	4.78915e-09	5.50334e-09	0	0.225717	-0.10092	-0.0961216	0	2.52157	3.51508	5.28875	0	0.137968	0.0954145	0.0238331	0
changes realtive
background	0	0.605724	0.615994	0.609642	0	0.192536	0.18128	-0.165368	0	0.527073	0.532854	0.542781	0	0.0497753	0.0485981	0.0386975	0	-0.0353196	-0.0366088	-0.044532	0	0.0153097	0.0144417	0.0118451	0	0.460829	0.491774	0.442472	0	0.308808	0.311151	0.320414	0	0.0224961	0.0297513	0.0501099	0	0.012273	0.0227663	0.0460152	0	-0.256079	-0.253243	-0.452573	0	0.545508	0.551734	0.577866	0
ore grade	0	-0.149673	-0.165765	-0.171279	0	-0.120331	-0.127491	-0.21109	0	-0.0580709	-0.0626876	-0.0489716	0	-0.0350737	-0.0391659	-0.047489	0	-0.595476	-0.683647	-0.690021	0	-1.01	-1.15983	-1.16139	0	-0.463555	-0.486964	-0.530676	0	-0.306298	-0.350003	-0.346275	0	-0.377563	-0.430222	-0.430538	0	-0.118259	-0.130355	-0.138732	0	-1.02889	-1.19985	-1.33606	0	-0.0376888	-0.040901	-0.0265605	0
mine electrification	0	0.0016919	0.0027877	0.0126083	0	-0.00914181	-0.0213012	-0.0186373	0	0.0174807	0.0373096	0.037812	0	0.00585137	0.0110362	0.0303766	0	0.0008015	0.000693947	0.010597	0	0.000641236	0.00119324	0.00407804	0	-0.0304103	-0.0701147	-0.0258929	0	0.102939	0.222748	0.366301	0	0.0127619	0.0259121	0.0494872	0	0.0221811	0.0442752	0.0939715	0	0.00833696	0.042849	0.271665	0	0.0138853	0.0295171	0.030403	0
electrification of equipment	0	-0.00254805	-0.00321996	-0.00547877	0	-0.0673394	-0.137148	-0.322659	0	0.0124876	0.026341	0.0377455	0	-0.00120011	-0.00251986	-0.00433345	0	-0.00263688	-0.00541637	-0.00896426	0	-0.000472411	-0.00101365	-0.00175863	0	-0.011809	-0.0223265	-0.0360263	0	0.00498085	0.010342	0.0174743	0	-0.00569217	-0.0113514	-0.0164539	0	-0.00819973	-0.0164184	-0.0240962	0	-0.0238316	-0.0476125	-0.08094	0	0.0114398	0.0241356	0.0414001	0
HPGR adoption	0	0.000668425	0.00104931	0.00141756	0	0.0100285	0.0143539	0.0272684	0	0.00155124	0.00202707	0.00281682	0	0.00118418	0.00186613	0.00250353	0	0.0010949	0.00172451	0.00227491	0	0.000205972	0.000333403	0.000458166	0	0.0395239	0.0562246	0.0704912	0	0.000850233	0.00122187	0.0015116	0	0.0030991	0.00460094	0.00551148	0	0.00465374	0.00698058	0.00852634	0	0.00990089	0.0150498	0.0204592	0	0.00058662	0.000725879	0.00062287	0
recovery efficiency	0	0	0.00364911	0.00695733	0	0	0.00060652	0.00159371	0	0	0.000162936	0.00016973	0	0	0.00010882	0.00017065	0	0	0.00297878	0.00574697	0	0	0.000167477	0.00031645	0	0	0.00312799	0.00555731	0	0	0.000933139	0.000940383	0	0	0.000297415	0.000434167	0	0	0.000391883	0.000539066	0	0	0.00470765	0.00891421	0	0	9.74256e-05	5.42773e-05	0
energy efficiency	0	0	0.00109977	0.00563542	0	0	0.0177042	0.134842	0	0	0.00759178	0.0341849	0	0	0.00159438	0.00726683	0	0	0.000922791	0.00487707	0	0	0.000257076	0.00129306	0	0	0.00875745	0.0521097	0	0	0.00651009	0.0128217	0	0	0.00416954	0.0172534	0	0	0.00687218	0.0287745	0	0	0.00867842	0.0445628	0	0	0.00423359	0.0159618	0
material efficiency	0	0	0.00752002	0.0397241	0	0	0.00201101	0.013607	0	0	0.00257577	0.012315	0	0	0.0216812	0.114242	0	0	0.0128372	0.0677773	0	0	0.00591143	0.0311725	0	0	0.00233348	0.0142514	0	0	0.0122865	0.0639835	0	0	0.00906806	0.0467424	0	0	0.0121923	0.062835	0	0	0.00585874	0.0422828	0	0	0.00556704	0.0282643	0
hydrogen as reductant	0	-0.00318801	-0.00624105	-0.00318223	0	-0.0360094	-0.0911035	-0.0900696	0	0.00835348	0.0204892	0.030643	0	-0.00647072	-0.0155682	-0.0105849	0	-0.0046382	-0.0113438	-0.0085616	0	-0.000949094	-0.00239382	-0.00177318	0	-0.0058452	-0.0118626	-0.0206986	0	0.00221082	0.00390242	0.00854312	0	-0.00312407	-0.00807813	-0.00469349	0	-0.00885715	-0.0224873	-0.0136905	0	-0.0141441	-0.0447394	-0.27914	0	0.00758409	0.0197203	0.0266781	0
secondary market	0	0.357155	0.380312	0.368651	0	0.628698	0.771069	1.17457	0	0.308137	0.286375	0.239037	0	0.626049	0.657712	0.607517	0	1.14928	1.29181	1.31685	0	1.45822	1.67253	1.74586	0	0.602236	0.664698	0.680501	0	0.577825	0.536303	0.381899	0	0.4954	0.555958	0.522369	0	0.591544	0.621771	0.554743	0	1.56886	1.81338	2.11997	0	0.300795	0.281569	0.219533	0
production pathways	0	0.0139423	-0.0619943	-0.0491558	0	0.115198	0.147804	0.172939	0	0.049557	0.0430604	0.0285998	0	-0.0323802	-0.0322789	-0.0282025	0	-0.00877773	-0.00179882	0.000178971	0	-0.150996	-0.153721	-0.116413	0	0.0151502	-0.0189112	-0.00269463	0	0.00679044	0.00685163	0.00149315	0	0.0778037	0.138547	0.159208	0	0.0403548	-0.018043	-0.0171851	0	0.0465185	0.0648469	0.0975681	0	0.0174071	0.0120382	0.00300697	0
absolute demand [Mt nickel sulfate]	1.83284	6.44455	16.7249	17.6221
absolute impacts	0.00474856	0.00294243	0.00974126	0.00842164	0.717651	0.722597	1.58619	1.9527	142.928	67.0567	135.512	113.875	1.53654e-08	2.1193e-08	4.86446e-08	4.28182e-08	0.000673061	0.00117306	0.00262773	0.00222468	1.90993e-08	4.62061e-08	1.08426e-07	8.93028e-08	0.0153098	0.0212032	0.0535437	0.0516086	0.0384575	0.0408228	0.0834348	0.0631887	6.33555e-08	1.72605e-07	3.93906e-07	3.65831e-07	10.2516	16.7367	44.1597	39.2586	99.3505	240.806	534.954	518.963	14.527	7.17573	14.7888	11.5607	4.76172
change		-0.380353	1.05141	0.773514		0.00689142	1.21025	1.72096		-0.530836	-0.051889	-0.203268		0.379264	2.16585	1.78666		0.742865	2.90415	2.30532		1.41926	4.67698	3.67571		0.384942	2.49734	2.37094		0.0615041	1.16953	0.64308		1.72439	5.21739	4.77425		0.632583	3.30757	2.82949		1.4238	4.38451	4.22356		-0.506043	0.0180213	-0.204191
market comparison
method	EF v3.1, eutrophication: freshwater, fraction of nutrients reaching freshwater end compartment (P)				EF v3.1, ionising radiation: human health, human exposure efficiency relative to u235				EF v3.1, energy resources: non-renewable, abiotic depletion potential (ADP): fossil fuels				EF v3.1, human toxicity: non-carcinogenic, organics, comparative toxic unit for human (CTUh)				EF v3.1, material resources: metals/minerals, abiotic depletion potential (ADP): elements (ultimate reserves)				EF v3.1, human toxicity: carcinogenic, inorganics, comparative toxic unit for human (CTUh)				EF v3.1, climate change: land use and land use change, global warming potential (GWP100)				EF v3.1, photochemical oxidant formation: human health, tropospheric ozone concentration increase				EF v3.1, human toxicity: carcinogenic, comparative toxic unit for human (CTUh)				EF v3.1, ecotoxicity: freshwater, organics, comparative toxic unit for ecosystems (CTUe)				EF v3.1, land use, soil quality index				EF v3.1, climate change, global warming potential (GWP100)				EF v3.1, water use, user deprivation potential (deprivation-weighted water consumption)
scenario	remind - SSP2-NDC - 2025	remind - SSP2-NDC - 2050	remind - SSP2-PkBudg1150 - 2050	remind - SSP2-PkBudg500 - 2050	remind - SSP2-NDC - 2025	remind - SSP2-NDC - 2050	remind - SSP2-PkBudg1150 - 2050	remind - SSP2-PkBudg500 - 2050	remind - SSP2-NDC - 2025	remind - SSP2-NDC - 2050	remind - SSP2-PkBudg1150 - 2050	remind - SSP2-PkBudg500 - 2050	remind - SSP2-NDC - 2025	remind - SSP2-NDC - 2050	remind - SSP2-PkBudg1150 - 2050	remind - SSP2-PkBudg500 - 2050	remind - SSP2-NDC - 2025	remind - SSP2-NDC - 2050	remind - SSP2-PkBudg1150 - 2050	remind - SSP2-PkBudg500 - 2050	remind - SSP2-NDC - 2025	remind - SSP2-NDC - 2050	remind - SSP2-PkBudg1150 - 2050	remind - SSP2-PkBudg500 - 2050	remind - SSP2-NDC - 2025	remind - SSP2-NDC - 2050	remind - SSP2-PkBudg1150 - 2050	remind - SSP2-PkBudg500 - 2050	remind - SSP2-NDC - 2025	remind - SSP2-NDC - 2050	remind - SSP2-PkBudg1150 - 2050	remind - SSP2-PkBudg500 - 2050	remind - SSP2-NDC - 2025	remind - SSP2-NDC - 2050	remind - SSP2-PkBudg1150 - 2050	remind - SSP2-PkBudg500 - 2050	remind - SSP2-NDC - 2025	remind - SSP2-NDC - 2050	remind - SSP2-PkBudg1150 - 2050	remind - SSP2-PkBudg500 - 2050	remind - SSP2-NDC - 2025	remind - SSP2-NDC - 2050	remind - SSP2-PkBudg1150 - 2050	remind - SSP2-PkBudg500 - 2050	remind - SSP2-NDC - 2025	remind - SSP2-NDC - 2050	remind - SSP2-PkBudg1150 - 2050	remind - SSP2-PkBudg500 - 2050	remind - SSP2-NDC - 2025
| nickel sulfate | World | market_nickel_sulfate	0.00259082	0.000456576	0.000582439	0.000477903	0.391552	0.112125	0.0948397	0.11081	77.9818	10.4052	8.10237	6.46209	8.38339e-09	3.28851e-09	2.90851e-09	2.42981e-09	0.000367223	0.000182023	0.000157114	0.000126244	1.04206e-08	7.16979e-09	6.48291e-09	5.06767e-09	0.00835307	0.0032901	0.00320143	0.00292863	0.0209825	0.00633446	0.00498864	0.00358577	3.45669e-08	2.67831e-08	2.3552e-08	2.07598e-08	5.59332	2.59703	2.64035	2.22781	54.2058	37.3658	31.9854	29.4496	7.92597	1.11346	0.884237	0.656038	2.598
| nickel sulfate, from primary supply | World | market_nickel_sulfate	0.00299286	0.00147845	0.00250992	0.00236654	0.439664	0.275467	0.234699	0.306084	90.1364	27.4985	21.4816	16.8618	9.81368e-09	1.06719e-08	1.0404e-08	9.26701e-09	0.000435184	0.000724762	0.000741612	0.000705886	1.24435e-08	3.21009e-08	3.57618e-08	3.50636e-08	0.0095191	0.00942097	0.0113734	0.0106755	0.0243484	0.0212546	0.0184782	0.0133017	3.6704e-08	5.44284e-08	6.5718e-08	6.19007e-08	6.36625	6.1025	7.76864	6.95655	63.8384	137.178	140.706	141.809	9.23443	3.65128	3.24102	2.64385	2.95742
| nickel sulfate, from secondary supply | World | market_nickel_sulfate	0.000575712	0.000173332	0.000173754	0.000176685	0.150402	0.0668501	0.0651852	0.0796657	17.0604	5.66722	5.26555	4.80344	1.21451e-09	1.24198e-09	1.31922e-09	1.33935e-09	2.65899e-05	3.15858e-05	3.31827e-05	3.37973e-05	2.81253e-10	2.59348e-10	2.74865e-10	2.83624e-10	0.00250869	0.00159074	0.00146872	0.00169308	0.00411145	0.00219888	0.00212844	0.00203618	2.38554e-08	1.91203e-08	1.46115e-08	1.41983e-08	1.71923	1.62538	1.55299	1.47363	5.92518	9.69971	8.93323	11.5295	1.36769	0.410021	0.384526	0.339003	0.796516
																																													0.148107	0.112295	0.118643	0.128223
[truncated: 51 more columns]
