# Supplementary material for: Scenario-based Inventory Modelling for Prospective Life Cycle Assessment of Mineral Raw Materials (SIMPL-Minerals)
Source: Research Square preprint supplement (doi:10.21203/rs.3.rs-8222189/v1), 2025-11-28
Supplement: Supplementary file 3 [file 8315e53db93ee06be93d4d2e.xlsx]

## Sheet: Title_page
International Journal of Life Cycle Assessment
Scenario-based Inventory Modelling for Prospective Life Cycle Assessment of Mineral Raw Materials (SIMPL-Minerals)
Jonas Klimt (1),*, Robert Istrate (1), Valerio Barbarossa (1), Antoine Beylot (2), Frederic Lai (2), Bernhard Steubing (1)
1 Institute of Environmental Sciences (CML), Leiden University, 2333 CC Leiden, The Netherlands
2 BRGM, F-45060 Orléans, France
* Correspondence: j.b.j.klimt@cml.leidenuniv.nl
Supplementary Information 4
Sheets	Content
RKEF_OAS	Every tab represents a individual database withing brightway, which have been exported individually and put together in this excel.
HPAL_OAS
RKEF_CHA
HPAL_CHA
FS_CAZ		please mind the ecoinvent datapoint placeholders
RePyro_WORLD
ReHydro_WORLD
market_nickel_sulfate

## Sheet: RKEF_OAS
Project parameters
name	amount	formula
ore_grade_laterite	0.0122
ore_grade_sulfide	0.028
intermediate_MHP_grade	0.4087
purification_recovery_efficiency_HPAL	0.95
final_product_grade	0.22
refining_recovery_efficiency_HPAL	0.995
mass_laterite_concentrate_input_HPAL	35.2632	intermediate_MHP_grade / (purification_recovery_efficiency_HPAL * ore_grade_laterite)
mine_electrification	0
technology_adaption_HPGR	0
energy_efficiency_gain_HPGR	0.3
energy_efficiency_improvement	0
material_efficiency_improvement	0
intermediate_FeNi_grade	0.029
purification_recovery_efficiency_RKEF	0.88
refining_recovery_efficiency_RKEF	0.995
technology_adaption_electric_drying	0
intermediate_nickel_class_I_grade	1
refining_recovercy_efficiency_FS	0.99
intermediate_converter_nickel_matte_grade	0.78
concentrate_grade_FS	0.16
purification_recovery_efficiency_FS	0.9
concentration_recovery_efficiency_sulphide_ore	0.79
mass_sulphide_ore_input	7.23327	concentrate_grade_FS / (concentration_recovery_efficiency_sulphide_ore * ore_grade_sulfide)
ore_grade_sulfide_cobalt	0.002
purification_recovery_efficiency_FS_cobalt	0.23
refining_recovery_efficiency_FS_cobalt	0.98
technology_adaption_hydrogen_as_reductant	0
sulfuric_acid_plant_on_site_share_CHA	0.5
electrification_of_equipment	0
Database	RKEF_OAS
default_allocation	equal
format	Copied from 'RKEF_ID'
read_only	0
Activity	final product, nickel sulfate
code	5306d7492d5d4db79d172d6f29df7a46
id	2.16892e+17
location	OAS
processor	RKEF_OAS::41a9a267b5bd416eaa252742ad571ff8
type	product
unit	kilogram
Exchanges
Activity	intermediate, NPI
code	4596852cef42451191c028fec466e350
id	2.16892e+17
location	OAS
processor	RKEF_OAS::ad817fc586694cf6ace9475c5b42c89b
type	product
unit	kilogram
Exchanges
Activity	purification, RKEF
allocation	equal
code	ad817fc586694cf6ace9475c5b42c89b
comment	From Roy et al. (2025) scaled to 1kg NPI intermediate. No allocation needed as Fe form NPI to matte conversion is usually a waste product to slag.
id	2.16892e+17
location	OAS
type	process
Parameters	216891606012305411
name	amount	formula	code	database
dummy_parameter	1		ad817fc586694cf6ace9475c5b42c89b	RKEF_OAS
Exchanges
name	amount	database	location	unit	type	formula	comment	original_amount	reference product
intermediate, NPI	1	RKEF_OAS	OAS	kilogram	production
heat production, at hard coal industrial furnace 1-10MW	9.173	superstrucutre_Ni_case_study_2050only	RoW	megajoule	technosphere	9.173 * (1 - energy_efficiency_improvement) * (1 - technology_adaption_hydrogen_as_reductant)	for rotary kiln (heat equivalent of coal as reductant)	1	heat, district or industrial, other than natural gas
market for heat, district or industrial, natural gas	3.532	superstrucutre_Ni_case_study_2050only	OAS	megajoule	technosphere	3.532 * (1 - energy_efficiency_improvement) * (1 - electrification_of_equipment)	for drying before rotary kiln	1	heat, district or industrial, natural gas
market for hydrogen, gaseous, low pressure	0	superstrucutre_Ni_case_study_2050only	OAS	kilogram	technosphere	(9.173 /28.9) * 0.85 * (2/12) * technology_adaption_hydrogen_as_reductant	for switching the reductant to hydrogen instead of coal, 28.9 Mj/kg heating value of coke, 85% carbon content of coke (both taken from ecoinvent process coke as input to heat, district or industrial, other than natural gas), 2 g/mol H2, 12 g/mol C	1	hydrogen, gaseous, low pressure
market group for electricity, high voltage	1.068	superstrucutre_Ni_case_study_2050only	OAS	kilowatt hour	technosphere	1.068 * (1 - energy_efficiency_improvement) + 3.532/3.6 * electrification_of_equipment	for electric furnace & for electrification of drying process	1	electricity, high voltage
ore, nickel laterite	2.70119	HPAL_OAS	OAS	kilogram	technosphere	intermediate_FeNi_grade / purification_recovery_efficiency_RKEF / ore_grade_laterite		1
Activity	refining, NPI to matte leaching
allocation	equal
code	41a9a267b5bd416eaa252742ad571ff8
comment	from Roy et al. (2025) scaled to 1kg of nickel sulfate hexahydrate from NPI via leaching. "It models pressure leaching with sulfuric acid and air, neutralization with limestone to precipitate iron and chromium impurities, nickel electrolysis to metal, re-dissolution and evaporative crystallization as nickel sulfate. "(Roy et al., 2025)
id	2.16892e+17
location	OAS
type	process
Exchanges
name	amount	database	location	unit	categories	type	formula	comment	original_amount	reference product
Carbon dioxide, fossil	0.59	biosphere3		kilogram	air	biosphere	0.590 * (1 - material_efficiency_improvement)	direct emissions from limestone usage	1
Water, unspecified natural origin	0.14	biosphere3		cubic meter	natural resource::in ground	biosphere	0.14 * (1 - material_efficiency_improvement)	acts as solvent and carrier medium	1
final product, nickel sulfate	1	RKEF_OAS	OAS	kilogram		production
intermediate, NPI	7.62433	RKEF_OAS	OAS	kilogram		technosphere	final_product_grade / refining_recovery_efficiency_RKEF / intermediate_FeNi_grade		1
market for limestone, crushed, washed	1.342	superstrucutre_Ni_case_study_2050only	RoW	kilogram		technosphere	1.342 * (1 - material_efficiency_improvement)	for neutralization and impurity removal	1	limestone, crushed, washed
market for soda ash, dense	0.022	superstrucutre_Ni_case_study_2050only	GLO	kilogram		technosphere	0.022 * (1 - material_efficiency_improvement)	for precipitating impurities	1	soda ash, dense
market for sodium hydroxide, without water, in 50% solution state	0.022	superstrucutre_Ni_case_study_2050only	RoW	kilogram		technosphere	0.022 * (1 - material_efficiency_improvement)	for neutralization and precipitation of impurities	1	sodium hydroxide, without water, in 50% solution state
market for sulfuric acid	1.65	superstrucutre_Ni_case_study_2050only	RoW	kilogram		technosphere	1.65 * (1 - material_efficiency_improvement)	for pressure leaching	1	sulfuric acid
market group for electricity, high voltage	8.882	superstrucutre_Ni_case_study_2050only	OAS	kilowatt hour		technosphere	8.882 * (1 - energy_efficiency_improvement)	for electrolysis to metal	1	electricity, high voltage
market group for heat, district or industrial, natural gas	1.223	superstrucutre_Ni_case_study_2050only	GLO	megajoule		technosphere	1.223 * (1 - energy_efficiency_improvement)	for evaporative crystallization	1	heat, district or industrial, natural gas

## Sheet: HPAL_OAS
Project parameters
name	amount	formula
ore_grade_laterite	0.0122
ore_grade_sulfide	0.028
intermediate_MHP_grade	0.4087
purification_recovery_efficiency_HPAL	0.95
final_product_grade	0.22
refining_recovery_efficiency_HPAL	0.995
mass_laterite_concentrate_input_HPAL	35.2632	intermediate_MHP_grade / (purification_recovery_efficiency_HPAL * ore_grade_laterite)
mine_electrification	0
technology_adaption_HPGR	0
energy_efficiency_gain_HPGR	0.3
energy_efficiency_improvement	0
material_efficiency_improvement	0
intermediate_FeNi_grade	0.029
purification_recovery_efficiency_RKEF	0.88
refining_recovery_efficiency_RKEF	0.995
technology_adaption_electric_drying	0
intermediate_nickel_class_I_grade	1
refining_recovercy_efficiency_FS	0.99
intermediate_converter_nickel_matte_grade	0.78
concentrate_grade_FS	0.16
purification_recovery_efficiency_FS	0.9
concentration_recovery_efficiency_sulphide_ore	0.79
mass_sulphide_ore_input	7.23327	concentrate_grade_FS / (concentration_recovery_efficiency_sulphide_ore * ore_grade_sulfide)
ore_grade_sulfide_cobalt	0.002
purification_recovery_efficiency_FS_cobalt	0.23
refining_recovery_efficiency_FS_cobalt	0.98
technology_adaption_hydrogen_as_reductant	0
sulfuric_acid_plant_on_site_share_CHA	0.5
electrification_of_equipment	0
Database	HPAL_OAS
default_allocation	equal
format	Copied from 'HPAL_ID'
read_only	0
Activity	cobalt cathode, >99.9%
allocation_factor	0.07
code	9193887556e44e6fa7448fb2a6bbf931
id	2.16904e+17
location	OAS
processor	HPAL_OAS::db2dd9a748b7490789b1993c7418432d
type	product
unit	kilogram
Exchanges
Activity	concentrate, from nickel laterite ore
code	d337420b061c4257addcfb15fe4e16be
id	2.16904e+17
location	OAS
processor	HPAL_OAS::c8d91c09e5c0475699b783ecc49efbe7
type	product
unit	kilogram
Exchanges
Activity	concentration, nickel laterite ore
allocation	equal
code	c8d91c09e5c0475699b783ecc49efbe7
comment	From Eckelmann et al. (2009), for milling and grinding. 1 kWh = 3.6 MJ
id	2.16904e+17
location	OAS
type	process
Parameters	216903615814606852
name	amount	formula	code	database
dummy_parameter	1		c8d91c09e5c0475699b783ecc49efbe7	HPAL_OAS
Exchanges
name	amount	database	location	unit	type	formula	comment	original_amount	reference product
concentrate, from nickel laterite ore	1	HPAL_OAS	OAS	kilogram	production
market group for electricity, high voltage	0.0556	superstrucutre_Ni_case_study_2050only	OAS	kilowatt hour	technosphere	0.0556 * ((1 - technology_adaption_HPGR) + (1 - energy_efficiency_gain_HPGR) * technology_adaption_HPGR)	for milling and grinding	0.05556	electricity, high voltage
ore, nickel laterite	1	HPAL_OAS	OAS	kilogram	technosphere
Activity	final product, nickel sulfate
allocation_factor	0.93
code	5e2bfa6acad64506b2cacb3dd06cb8b4
id	2.16904e+17
location	OAS
processor	HPAL_OAS::db2dd9a748b7490789b1993c7418432d
type	product
unit	kilogram
Exchanges
Activity	intermediate, mixed hydroxide precipitate (MHP)
allocation_factor	1
code	7818b1f2ad3343be83478d314e298fdc
id	2.16904e+17
location	OAS
processor	HPAL_OAS::2ad6c2acda0a40698e0709e57f9bc7d6_copy1
type	product
unit	kilogram
Exchanges
Activity	intermediate, mixed hydroxide precipitate (MHP)
allocation_factor	1
code	f47c2d6e2a634c709cdc20f0b2831634
id	2.16904e+17
location	OAS
processor	HPAL_OAS::2ad6c2acda0a40698e0709e57f9bc7d6
type	product
unit	kilogram
Exchanges
Activity	mining, nickel laterite
allocation	equal
code	258a0d3d1a334cdbb0b612018f31da13
comment	Inventory from Roy et al. (2025) scaled to 1kg of laterite ore. Electricity and diesel consumption from Eckelmann et al. (2009) split into stationary and mobile use taking the ratios from Roy et al. (2025).
id	2.16904e+17
location	OAS
type	process
Parameters	216903615814606856
name	amount	formula	code	database
dummy_parameter	1		258a0d3d1a334cdbb0b612018f31da13	HPAL_OAS
Exchanges
name	amount	database	location	unit	categories	type	formula	comment	original_amount	reference product
Aluminium	0.0297	biosphere3		kilogram	natural resource::in ground	biosphere
Calcium	0.0005	biosphere3		kilogram	natural resource::in ground	biosphere
Chromium	0.0229	biosphere3		kilogram	natural resource::in ground	biosphere
Cobalt	0.0021	biosphere3		kilogram	natural resource::in ground	biosphere
Iron	0.4502	biosphere3		kilogram	natural resource::in ground	biosphere
Magnesium	0.0092	biosphere3		kilogram	natural resource::in ground	biosphere
Manganese	0.0118	biosphere3		kilogram	natural resource::in ground	biosphere
Nickel	0.0122	biosphere3		kilogram	natural resource::in ground	biosphere	ore_grade_laterite		1
Occupation, industrial area	0.00069	biosphere3		square meter-year	natural resource::land	biosphere
Transformation, from unspecified	0.00069	biosphere3		square meter	natural resource::land	biosphere
Transformation, to industrial area	0.00069	biosphere3		square meter	natural resource::land	biosphere
ore, nickel laterite	1	HPAL_OAS	OAS	kilogram		production
diesel, burned in building machine	0.1116	superstrucutre_Ni_case_study_2050only	OAS	megajoule		technosphere	0.1116 * (1 -mine_electrification) * (1 - energy_efficiency_improvement)	for mobile equipment incl. hauling trucks	0.11159	diesel, burned in building machine
diesel, burned in diesel-electric generating set, 10MW	0.0294	superstrucutre_Ni_case_study_2050only	OAS	megajoule		technosphere	0.0294 * (1 - mine_electrification) * (1 - energy_efficiency_improvement)	for stationary electricity generation on site	0.02941	diesel, burned in diesel-electric generating set, 10MW
market for blasting	0.00023	superstrucutre_Ni_case_study_2050only	GLO	kilogram		technosphere	0.00023 * (1 - material_efficiency_improvement)		0.00023	blasting
market group for electricity, high voltage	0.06	superstrucutre_Ni_case_study_2050only	OAS	kilowatt hour		technosphere	((0.0294 + 0.1116) / 3.6) * mine_electrification * (1 - energy_efficiency_improvement) + 0.06	auxiliar electricity consumption and electricity consumption for electrification of the mine (i.e., electrification of mobile equipment and on site electricity grid connection or installation of renewables)	1	electricity, high voltage
Activity	ore, nickel laterite
code	f5f632f482124dc39652a36d9517b26e
id	2.16904e+17
location	OAS
processor	HPAL_OAS::258a0d3d1a334cdbb0b612018f31da13
type	product
unit	kilogram
Exchanges
Activity	purification, HPAL, sulfiric acid plant off site
allocation	manual
code	2ad6c2acda0a40698e0709e57f9bc7d6_copy1
comment	Inventory from Roy et al. (2025) scaled to 1 kg of MHP intermediate product. The concentration is processed to MHP via high pressure acid leaching. The sulfuric acid plant is modelled off site.
id	2.16904e+17
location	OAS
type	process
Parameters	216903615814606860
name	amount	formula	code	database
dummy_parameter	1		2ad6c2acda0a40698e0709e57f9bc7d6_copy1	HPAL_OAS
Exchanges
name	amount	database	location	unit	categories	type	formula	comment	original_amount	reference product
Carbon dioxide, fossil	2.684	biosphere3		kilogram	air	biosphere	6.1 * (1 - material_efficiency_improvement) * 0.44		1
Water, unspecified natural origin	0.065	biosphere3		cubic meter	natural resource::in water	biosphere	0.065 * (1 - material_efficiency_improvement)	for leaching solution	0.065
intermediate, mixed hydroxide precipitate (MHP)	1	HPAL_OAS	OAS	kilogram		production
concentrate, from nickel laterite ore	35.2632	HPAL_OAS	OAS	kilogram		technosphere	mass_laterite_concentrate_input_HPAL		1
market for lime, packed	1.63	superstrucutre_Ni_case_study_2050only	RoW	kilogram		technosphere	1.63 * (1 - material_efficiency_improvement)	for neutralisation and precipitation of impurities	1.63	lime, packed
market for limestone, crushed, washed	6.1	superstrucutre_Ni_case_study_2050only	RoW	kilogram		technosphere	6.1 * (1 - material_efficiency_improvement)	for neutralisation and precipitation of impurities	6.1	limestone, crushed, washed
market for magnesium oxide	1.02	superstrucutre_Ni_case_study_2050only	GLO	kilogram		technosphere	1.02 * (1 - material_efficiency_improvement)	for neutralisation and precipitation of impurities	1.02	magnesium oxide
market for sulfuric acid	13.7	superstrucutre_Ni_case_study_2050only	RoW	kilogram		technosphere	13.7 * (1 - material_efficiency_improvement)	production off site	13.7	sulfuric acid
market group for electricity, high voltage	5.03	superstrucutre_Ni_case_study_2050only	OAS	kilowatt hour		technosphere	5.03 * (1 - energy_efficiency_improvement)	for autoclave and auxiliar equipment	5.03	electricity, high voltage
tailings, from HPAL	-34.2632	HPAL_OAS	OAS	kilogram		technosphere	-(mass_laterite_concentrate_input_HPAL -1)		-1
Activity	purification, HPAL, sulfiric acid plant on site
allocation	manual
code	2ad6c2acda0a40698e0709e57f9bc7d6
comment	Inventory from Roy et al. (2025) scaled to 1 kg of MHP intermediate product. The concentration is processed to MHP via high pressure acid leaching. The sulfuric acid plant is modelled on site.
id	2.16904e+17
location	OAS
type	process
Exchanges
name	amount	database	location	unit	categories	type	formula	comment	original_amount	reference product
Carbon dioxide, fossil	2.684	biosphere3		kilogram	air	biosphere	6.1 * (1 - material_efficiency_improvement) * 0.44	Direct CO2 emissions from limestone for Fe/Al removal. LCIs form Roy et al. (2025) using a factor of 0.44 kg CO2 per 1 kg of limestone.	1
Water, unspecified natural origin	0.065	biosphere3		cubic meter	natural resource::in water	biosphere	0.065 * (1 - material_efficiency_improvement)	for leaching solution	0.065
intermediate, mixed hydroxide precipitate (MHP)	1	HPAL_OAS	OAS	kilogram		production
concentrate, from nickel laterite ore	35.2632	HPAL_OAS	OAS	kilogram		technosphere	mass_laterite_concentrate_input_HPAL		1
market for lime, packed	1.63	superstrucutre_Ni_case_study_2050only	RoW	kilogram		technosphere	1.63 * (1 - material_efficiency_improvement)	for neutralisation and precipitation of impurities	1.63	lime, packed
market for limestone, crushed, washed	6.1	superstrucutre_Ni_case_study_2050only	RoW	kilogram		technosphere	6.1 * (1 -material_efficiency_improvement)	for neutralisation and precipitation of impurities	6.1	limestone, crushed, washed
market for magnesium oxide	1.02	superstrucutre_Ni_case_study_2050only	GLO	kilogram		technosphere	1.02 * (1 - material_efficiency_improvement)	for neutralisation and precipitation of impurities	1.02	magnesium oxide
sulfur production, petroleum refinery operation	4.47	superstrucutre_Ni_case_study_2050only	RoW	kilogram		technosphere	4.47 * (1 - material_efficiency_improvement)	sulfur is burned on site to produce SO2 which is then further processed into sulfuric acid (the catalyst is not modelled), sulfur burning also supplies the necessary electricy on site	4.47	sulfur
tailings, from HPAL	-14.2577	HPAL_OAS	OAS	kilogram		technosphere	-(mass_laterite_concentrate_input_HPAL * ((ore_grade_laterite * (1 - purification_recovery_efficiency_HPAL) + (1 - ore_grade_laterite) * intermediate_MHP_grade)))		-1
Activity	refining, MHP leaching
allocation	manual
code	db2dd9a748b7490789b1993c7418432d
comment	From Roy et al. (2025), leaching of the MHP. Mass allocation is used and rounded to two decimals. It is assumed that both recovery efficiencies increase simultaneous so that the mass allocation factor is static over time.
id	2.16904e+17
location	OAS
type	multifunctional
Parameters	216903615814606850
name	amount	formula	code	database
dummy_parameter	1		db2dd9a748b7490789b1993c7418432d	HPAL_OAS
Exchanges
name	amount	database	location	unit	categories	type	formula	comment	original_amount	reference product
Carbon dioxide, fossil	0.0132	biosphere3		kilogram	air	biosphere	0.0132 * (1 - energy_efficiency_improvement)		1
Water, unspecified natural origin	0.0022	biosphere3		cubic meter	natural resource::in ground	biosphere	0.0022 * (1 - material_efficiency_improvement)	process medium	0.0022
cobalt cathode, >99.9%	0.086	HPAL_OAS	OAS	kilogram		production
final product, nickel sulfate	1	HPAL_OAS	OAS	kilogram		production
intermediate, mixed hydroxide precipitate (MHP)	0.270499	HPAL_OAS	OAS	kilogram		technosphere	final_product_grade / (refining_recovery_efficiency_HPAL * intermediate_MHP_grade) * sulfuric_acid_plant_on_site_share_CHA		1
intermediate, mixed hydroxide precipitate (MHP)	0.270499	HPAL_OAS	OAS	kilogram		technosphere	final_product_grade / (refining_recovery_efficiency_HPAL * intermediate_MHP_grade) * (1-sulfuric_acid_plant_on_site_share_CHA)		1
market for sodium hydroxide, without water, in 50% solution state	0.079	superstrucutre_Ni_case_study_2050only	RoW	kilogram		technosphere	0.079 * (1 - material_efficiency_improvement)	for neutralization and impurity removal	0.079	sodium hydroxide, without water, in 50% solution state
market for sulfuric acid	0.64	superstrucutre_Ni_case_study_2050only	RoW	kilogram		technosphere	0.64 * (1 - material_efficiency_improvement)	for leaching	0.64	sulfuric acid
market group for electricity, high voltage	0.62	superstrucutre_Ni_case_study_2050only	OAS	kilowatt hour		technosphere	0.62 * (1 - energy_efficiency_improvement) + 0.44/3.6 * (1 -energy_efficiency_gain_HPGR) * electrification_of_equipment	for electrolysis (separating/producing cobalt) and for electrifcation of the double-effect evaporation process	0.62	electricity, high voltage
market group for heat, district or industrial, natural gas	0.44	superstrucutre_Ni_case_study_2050only	GLO	megajoule		technosphere	0.44 * (1 - energy_efficiency_improvement) * (1 - electrification_of_equipment)	for double-effect evaporation	0.44	heat, district or industrial, natural gas
Activity	tailings management, from HPAL
allocation	equal
code	e049afc3f2224eedb797af0203bc4ab4
comment	From Roy et al. (2025)
id	2.16904e+17
location	OAS
type	process
Exchanges
name	amount	database	location	unit	categories	type
Aluminium III	0.01348	biosphere3		kilogram	water::ground-, long-term	biosphere
Aluminium III	4.0744e-05	biosphere3		kilogram	water::ground-	biosphere
Antimony ion	2.0319e-08	biosphere3		kilogram	water::ground-, long-term	biosphere
Antimony ion	1.2102e-10	biosphere3		kilogram	water::ground-	biosphere
Arsenic ion	3.1909e-09	biosphere3		kilogram	water::ground-	biosphere
Arsenic ion	5.7275e-07	biosphere3		kilogram	water::ground-, long-term	biosphere
Barium II	5.4844e-10	biosphere3		kilogram	water::ground-	biosphere
Barium II	2.0344e-05	biosphere3		kilogram	water::ground-, long-term	biosphere
Beryllium II	1.927e-07	biosphere3		kilogram	water::ground-, long-term	biosphere
Beryllium II	2.2975e-09	biosphere3		kilogram	water::ground-	biosphere
Boron	8.9636e-07	biosphere3		kilogram	water::ground-, long-term	biosphere
Boron	5.2078e-09	biosphere3		kilogram	water::ground-	biosphere
Cadmium II	1.6422e-09	biosphere3		kilogram	water::ground-	biosphere
Cadmium II	1.0236e-07	biosphere3		kilogram	water::ground-, long-term	biosphere
Calcium II	0.04624	biosphere3		kilogram	water::ground-, long-term	biosphere
Calcium II	0.00394	biosphere3		kilogram	water::ground-	biosphere
Chromium VI	2.4999e-06	biosphere3		kilogram	water::ground-	biosphere
Chromium VI	0.00047	biosphere3		kilogram	water::ground-, long-term	biosphere
Cobalt II	0.00085	biosphere3		kilogram	water::ground-, long-term	biosphere
Cobalt II	3.7943e-05	biosphere3		kilogram	water::ground-	biosphere
Copper ion	1.4634e-07	biosphere3		kilogram	water::ground-	biosphere
Copper ion	6.6804e-05	biosphere3		kilogram	water::ground-, long-term	biosphere
Iron ion	0.30743	biosphere3		kilogram	water::ground-, long-term	biosphere
Iron ion	0.00067	biosphere3		kilogram	water::ground-	biosphere
Lead II	9.0954e-07	biosphere3		kilogram	water::ground-, long-term	biosphere
Lead II	4.5626e-10	biosphere3		kilogram	water::ground-	biosphere
Magnesium	0.00078	biosphere3		kilogram	water::ground-	biosphere
Magnesium	0.00903	biosphere3		kilogram	water::ground-, long-term	biosphere
Manganese II	0.00024	biosphere3		kilogram	water::ground-	biosphere
Manganese II	0.00737	biosphere3		kilogram	water::ground-, long-term	biosphere
Mercury II	4.7249e-08	biosphere3		kilogram	water::ground-, long-term	biosphere
Mercury II	2.0108e-10	biosphere3		kilogram	water::ground-	biosphere
Molybdenum VI	1.5676e-08	biosphere3		kilogram	water::ground-	biosphere
Molybdenum VI	3.0931e-07	biosphere3		kilogram	water::ground-, long-term	biosphere
Nickel II	0.00451	biosphere3		kilogram	water::ground-, long-term	biosphere
Nickel II	6.4237e-05	biosphere3		kilogram	water::ground-	biosphere
Occupation, dump site	0.0011	biosphere3		square meter-year	natural resource::land	biosphere
Potassium I	4.2118e-08	biosphere3		kilogram	water::ground-	biosphere
Potassium I	1.6448e-05	biosphere3		kilogram	water::ground-, long-term	biosphere
Scandium	6.3972e-05	biosphere3		kilogram	water::ground-, long-term	biosphere
Scandium	8.9817e-07	biosphere3		kilogram	water::ground-	biosphere
Selenium IV	1.8771e-09	biosphere3		kilogram	water::ground-	biosphere
Selenium IV	2.682e-07	biosphere3		kilogram	water::ground-, long-term	biosphere
Silicon	5.1797e-05	biosphere3		kilogram	water::ground-	biosphere
Silicon	0.01044	biosphere3		kilogram	water::ground-, long-term	biosphere
Silver I	6.0994e-10	biosphere3		kilogram	water::ground-	biosphere
Silver I	1.1434e-06	biosphere3		kilogram	water::ground-, long-term	biosphere
Sodium I	7.9988e-05	biosphere3		kilogram	water::ground-	biosphere
Sodium I	0.00179	biosphere3		kilogram	water::ground-, long-term	biosphere
Strontium II	1.4157e-07	biosphere3		kilogram	water::ground-	biosphere
Strontium II	2.2153e-05	biosphere3		kilogram	water::ground-, long-term	biosphere
Thallium I	1.2989e-07	biosphere3		kilogram	water::ground-, long-term	biosphere
Thallium I	1.0951e-10	biosphere3		kilogram	water::ground-	biosphere
Tin ion	8.4101e-07	biosphere3		kilogram	water::ground-, long-term	biosphere
Tin ion	3.9866e-09	biosphere3		kilogram	water::ground-	biosphere
Titanium ion	3.2148e-08	biosphere3		kilogram	water::ground-	biosphere
Titanium ion	0.00019	biosphere3		kilogram	water::ground-, long-term	biosphere
Transformation, from unspecified, natural (non-use)	8.4416e-06	biosphere3		square meter	natural resource::land	biosphere
Transformation, to dump site	8.4416e-06	biosphere3		square meter	natural resource::land	biosphere
Tungsten	3.6785e-09	biosphere3		kilogram	water::ground-	biosphere
Tungsten	3.2915e-07	biosphere3		kilogram	water::ground-, long-term	biosphere
Vanadium V	1.6669e-06	biosphere3		kilogram	water::ground-, long-term	biosphere
Vanadium V	8.358e-09	biosphere3		kilogram	water::ground-	biosphere
Zinc II	1.7277e-06	biosphere3		kilogram	water::ground-, long-term	biosphere
Zinc II	8.5372e-05	biosphere3		kilogram	water::ground-	biosphere
tailings, from HPAL	-1	HPAL_OAS	OAS	kilogram		production
Activity	tailings, from HPAL
code	f98bce51b2fc452aae8965ab7dcddabb
id	2.16904e+17
location	OAS
processor	HPAL_OAS::e049afc3f2224eedb797af0203bc4ab4
type	waste
unit	kilogram
Exchanges

## Sheet: RKEF_CHA
Project parameters
name	amount	formula
ore_grade_laterite	0.0122
ore_grade_sulfide	0.028
intermediate_MHP_grade	0.4087
purification_recovery_efficiency_HPAL	0.95
final_product_grade	0.22
refining_recovery_efficiency_HPAL	0.995
mass_laterite_concentrate_input_HPAL	35.2632	intermediate_MHP_grade / (purification_recovery_efficiency_HPAL * ore_grade_laterite)
mine_electrification	0
technology_adaption_HPGR	0
energy_efficiency_gain_HPGR	0.3
energy_efficiency_improvement	0
material_efficiency_improvement	0
intermediate_FeNi_grade	0.029
purification_recovery_efficiency_RKEF	0.88
refining_recovery_efficiency_RKEF	0.995
technology_adaption_electric_drying	0
intermediate_nickel_class_I_grade	1
refining_recovercy_efficiency_FS	0.99
intermediate_converter_nickel_matte_grade	0.78
concentrate_grade_FS	0.16
purification_recovery_efficiency_FS	0.9
concentration_recovery_efficiency_sulphide_ore	0.79
mass_sulphide_ore_input	7.23327	concentrate_grade_FS / (concentration_recovery_efficiency_sulphide_ore * ore_grade_sulfide)
ore_grade_sulfide_cobalt	0.002
purification_recovery_efficiency_FS_cobalt	0.23
refining_recovery_efficiency_FS_cobalt	0.98
technology_adaption_hydrogen_as_reductant	0
sulfuric_acid_plant_on_site_share_CHA	0.5
electrification_of_equipment	0
Database	RKEF_CHA
default_allocation	equal
format	Copied from 'RKEF_OAS'
read_only	0
Activity	final product, nickel sulfate
code	5306d7492d5d4db79d172d6f29df7a46
id	2.33937e+17
location	CHA
processor	RKEF_CHA::41a9a267b5bd416eaa252742ad571ff8
type	product
unit	kilogram
Exchanges
Activity	intermediate, NPI
code	4596852cef42451191c028fec466e350
id	2.33937e+17
location	CHA
processor	RKEF_CHA::ad817fc586694cf6ace9475c5b42c89b
type	product
unit	kilogram
Exchanges
Activity	purification, RKEF
allocation	equal
code	ad817fc586694cf6ace9475c5b42c89b
comment	From Roy et al. (2025) scaled to 1kg NPI intermediate. No allocation needed as Fe form NPI to matte conversion is usually a waste product to slag.
id	2.33937e+17
location	CHA
type	process
Parameters	233937235459014659
name	amount	formula	code	database
dummy_parameter	1		ad817fc586694cf6ace9475c5b42c89b	RKEF_CHA
Exchanges
name	amount	database	location	unit	type	formula	comment	original_amount	reference product
intermediate, NPI	1	RKEF_CHA	CHA	kilogram	production
market for heat, district or industrial, natural gas	3.532	superstrucutre_Ni_case_study_2050only	OAS	megajoule	technosphere	3.532 * (1 - energy_efficiency_improvement) * (1 - electrification_of_equipment)	for drying before rotary kiln	1	heat, district or industrial, natural gas
market for heat, district or industrial, natural gas	9.173	superstrucutre_Ni_case_study_2050only	CHA	megajoule	technosphere	9.173 * (1 - energy_efficiency_improvement) * (1 - technology_adaption_hydrogen_as_reductant)	for drying before rotary kiln	1	heat, district or industrial, natural gas
market for hydrogen, gaseous, low pressure	0	superstrucutre_Ni_case_study_2050only	CHA	kilogram	technosphere	(9.173/28.9) * 0.85 * (2/12) * technology_adaption_hydrogen_as_reductant	for switching the reductant to hydrogen instead of coal, 28.9 Mj/kg heating value of coke, 85% carbon content of coke (both taken from ecoinvent process coke as input to heat, district or industrial, other than natural gas), 2 g/mol H2, 12 g/mol C	1	hydrogen, gaseous, low pressure
market group for electricity, high voltage	1.068	superstrucutre_Ni_case_study_2050only	CHA	kilowatt hour	technosphere	1.068 * (1 - energy_efficiency_improvement) + 3.532/3.6 * electrification_of_equipment	for electric furnace & for electrification of drying process	1	electricity, high voltage
ore, nickel laterite	2.70119	HPAL_OAS	OAS	kilogram	technosphere	intermediate_FeNi_grade / purification_recovery_efficiency_RKEF / ore_grade_laterite		1
Activity	refining, NPI to matte leaching
allocation	equal
code	41a9a267b5bd416eaa252742ad571ff8
comment	from Roy et al. (2025) scaled to 1kg of nickel sulfate hexahydrate from NPI via leaching. "It models pressure leaching with sulfuric acid and air, neutralization with limestone to precipitate iron and chromium impurities, nickel electrolysis to metal, re-dissolution and evaporative crystallization as nickel sulfate. "(Roy et al., 2025)
id	2.33937e+17
location	CHA
type	process
Parameters	233937235459014658
name	amount	formula	code	database
dummy_parameter	1		41a9a267b5bd416eaa252742ad571ff8	RKEF_CHA
Exchanges
name	amount	database	location	unit	categories	type	formula	comment	original_amount	reference product
Carbon dioxide, fossil	0.59	biosphere3		kilogram	air	biosphere	0.590 * (1 - material_efficiency_improvement)	direct emissions from limestone usage	1
Water, unspecified natural origin	0.14	biosphere3		cubic meter	natural resource::in ground	biosphere	0.14 * (1 - material_efficiency_improvement)	acts as solvent and carrier medium	1
final product, nickel sulfate	1	RKEF_CHA	CHA	kilogram		production
intermediate, NPI	7.62433	RKEF_CHA	CHA	kilogram		technosphere	final_product_grade / refining_recovery_efficiency_RKEF / intermediate_FeNi_grade		1
market for limestone, crushed, washed	1.342	superstrucutre_Ni_case_study_2050only	RoW	kilogram		technosphere	1.342 * (1 - material_efficiency_improvement)	for neutralization and impurity removal	1	limestone, crushed, washed
market for soda ash, dense	0.022	superstrucutre_Ni_case_study_2050only	GLO	kilogram		technosphere	0.022 * (1 - material_efficiency_improvement)	for precipitating impurities	1	soda ash, dense
market for sodium hydroxide, without water, in 50% solution state	0.022	superstrucutre_Ni_case_study_2050only	RoW	kilogram		technosphere	0.022 * (1 - material_efficiency_improvement)	for neutralization and precipitation of impurities	1	sodium hydroxide, without water, in 50% solution state
market for sulfuric acid	1.65	superstrucutre_Ni_case_study_2050only	RoW	kilogram		technosphere	1.65 * (1 - material_efficiency_improvement)	for pressure leaching	1	sulfuric acid
market group for electricity, high voltage	8.882	superstrucutre_Ni_case_study_2050only	CHA	kilowatt hour		technosphere	8.882 * (1 - energy_efficiency_improvement)	for electrolysis to metal	1	electricity, high voltage
market group for heat, district or industrial, natural gas	1.223	superstrucutre_Ni_case_study_2050only	GLO	megajoule		technosphere	1.223 * (1 - energy_efficiency_improvement)	for evaporative crystallization	1	heat, district or industrial, natural gas

## Sheet: HPAL_CHA
Project parameters
name	amount	formula
ore_grade_laterite	0.0122
ore_grade_sulfide	0.028
intermediate_MHP_grade	0.4087
purification_recovery_efficiency_HPAL	0.95
final_product_grade	0.22
refining_recovery_efficiency_HPAL	0.995
mass_laterite_concentrate_input_HPAL	35.2632	intermediate_MHP_grade / (purification_recovery_efficiency_HPAL * ore_grade_laterite)
mine_electrification	0
technology_adaption_HPGR	0
energy_efficiency_gain_HPGR	0.3
energy_efficiency_improvement	0
material_efficiency_improvement	0
intermediate_FeNi_grade	0.029
purification_recovery_efficiency_RKEF	0.88
refining_recovery_efficiency_RKEF	0.995
technology_adaption_electric_drying	0
intermediate_nickel_class_I_grade	1
refining_recovercy_efficiency_FS	0.99
intermediate_converter_nickel_matte_grade	0.78
concentrate_grade_FS	0.16
purification_recovery_efficiency_FS	0.9
concentration_recovery_efficiency_sulphide_ore	0.79
mass_sulphide_ore_input	7.23327	concentrate_grade_FS / (concentration_recovery_efficiency_sulphide_ore * ore_grade_sulfide)
ore_grade_sulfide_cobalt	0.002
purification_recovery_efficiency_FS_cobalt	0.23
refining_recovery_efficiency_FS_cobalt	0.98
technology_adaption_hydrogen_as_reductant	0
sulfuric_acid_plant_on_site_share_CHA	0.5
electrification_of_equipment	0
Database	HPAL_CHA
default_allocation	equal
format	Copied from 'HPAL_OAS'
read_only	0
Activity	cobalt cathode, >99.9%
allocation_factor	0.07
code	9193887556e44e6fa7448fb2a6bbf931
id	2.16906e+17
location	CHA
processor	HPAL_CHA::db2dd9a748b7490789b1993c7418432d
type	product
unit	kilogram
Exchanges
Activity	final product, nickel sulfate
allocation_factor	0.93
code	5e2bfa6acad64506b2cacb3dd06cb8b4
id	2.16906e+17
location	CHA
processor	HPAL_CHA::db2dd9a748b7490789b1993c7418432d
type	product
unit	kilogram
Exchanges
Activity	intermediate, mixed hydroxide precipitate (MHP)
allocation_factor	1
code	7818b1f2ad3343be83478d314e298fdc
id	2.16906e+17
location	CHA
processor	HPAL_CHA::2ad6c2acda0a40698e0709e57f9bc7d6_copy1
type	product
unit	kilogram
Exchanges
Activity	intermediate, mixed hydroxide precipitate (MHP)
allocation_factor	1
code	f47c2d6e2a634c709cdc20f0b2831634
id	2.16906e+17
location	CHA
processor	HPAL_CHA::2ad6c2acda0a40698e0709e57f9bc7d6
type	product
unit	kilogram
Exchanges
Activity	purification, HPAL, sulfiric acid plant off site
allocation	manual
code	2ad6c2acda0a40698e0709e57f9bc7d6_copy1
comment	Inventory from Roy et al. (2025) scaled to 1 kg of MHP intermediate product. The concentration is processed to MHP via high pressure acid leaching. The sulfuric acid plant is modelled off site.
id	2.16906e+17
location	CHA
type	process
Parameters	216905749033426951
name	amount	formula	code	database
dummy_parameter	1		2ad6c2acda0a40698e0709e57f9bc7d6_copy1	HPAL_CHA
Exchanges
name	amount	database	location	unit	categories	type	formula	comment	original_amount	reference product
Carbon dioxide, fossil	2.684	biosphere3		kilogram	air	biosphere	6.1 * (1 - material_efficiency_improvement) * 0.44		1
Water, unspecified natural origin	0.065	biosphere3		cubic meter	natural resource::in water	biosphere	0.065 * (1 - material_efficiency_improvement)	for leaching solution	0.065
intermediate, mixed hydroxide precipitate (MHP)	1	HPAL_CHA	CHA	kilogram		production
concentrate, from nickel laterite ore	35.2632	HPAL_OAS	OAS	kilogram		technosphere	mass_laterite_concentrate_input_HPAL		1
market for lime, packed	1.63	superstrucutre_Ni_case_study_2050only	RoW	kilogram		technosphere	1.63 * (1 - material_efficiency_improvement)	for neutralisation and precipitation of impurities	1.63	lime, packed
market for limestone, crushed, washed	6.1	superstrucutre_Ni_case_study_2050only	RoW	kilogram		technosphere	6.1 * (1 - material_efficiency_improvement)	for neutralisation and precipitation of impurities	6.1	limestone, crushed, washed
market for magnesium oxide	1.02	superstrucutre_Ni_case_study_2050only	GLO	kilogram		technosphere	1.02 * (1 - material_efficiency_improvement)	for neutralisation and precipitation of impurities	1.02	magnesium oxide
market for sulfuric acid	13.7	superstrucutre_Ni_case_study_2050only	RoW	kilogram		technosphere	13.7 * (1 - material_efficiency_improvement)	sulfuric acid production off site	13.7	sulfuric acid
market group for electricity, high voltage	5.03	superstrucutre_Ni_case_study_2050only	CHA	kilowatt hour		technosphere	5.03 * (1 - energy_efficiency_improvement)	for autoclave and auxiliar equipment	1	electricity, high voltage
tailings, from HPAL	-34.2632	HPAL_CHA	CHA	kilogram		technosphere	-(mass_laterite_concentrate_input_HPAL -1)		-1
Activity	purification, HPAL, sulfiric acid plant on site
allocation	manual
code	2ad6c2acda0a40698e0709e57f9bc7d6
comment	Inventory from Roy et al. (2025) scaled to 1 kg of MHP intermediate product. The concentration is processed to MHP via high pressure acid leaching. The sulfuric acid plant is modelled on site.
id	2.16906e+17
location	CHA
type	process
Parameters	216905749033426958
name	amount	formula	code	database
dummy_parameter	1		2ad6c2acda0a40698e0709e57f9bc7d6	HPAL_CHA
Exchanges
name	amount	database	location	unit	categories	type	formula	comment	original_amount	reference product
Carbon dioxide, fossil	2.684	biosphere3		kilogram	air	biosphere	6.1 * (1 - material_efficiency_improvement) * 0.44	Direct CO2 emissions from limestone for Fe/Al removal. LCIs form Roy et al. (2025) using a factor of 0.44 kg CO2 per 1 kg of limestone.	1
Water, unspecified natural origin	0.065	biosphere3		cubic meter	natural resource::in water	biosphere	0.065 * (1 - material_efficiency_improvement)	for leaching solution	0.065
intermediate, mixed hydroxide precipitate (MHP)	1	HPAL_CHA	CHA	kilogram		production
concentrate, from nickel laterite ore	35.2632	HPAL_OAS	OAS	kilogram		technosphere	mass_laterite_concentrate_input_HPAL		1
market for lime, packed	1.63	superstrucutre_Ni_case_study_2050only	RoW	kilogram		technosphere	1.63 * (1 - material_efficiency_improvement)	for neutralisation and precipitation of impurities	1.63	lime, packed
market for limestone, crushed, washed	6.1	superstrucutre_Ni_case_study_2050only	RoW	kilogram		technosphere	6.1 * (1 -material_efficiency_improvement)	for neutralisation and precipitation of impurities	6.1	limestone, crushed, washed
market for magnesium oxide	1.02	superstrucutre_Ni_case_study_2050only	GLO	kilogram		technosphere	1.02 * (1 - material_efficiency_improvement)	for neutralisation and precipitation of impurities	1.02	magnesium oxide
sulfur production, petroleum refinery operation	4.47	superstrucutre_Ni_case_study_2050only	RoW	kilogram		technosphere	4.47 * (1 - material_efficiency_improvement)	sulfur is burned on site to produce SO2 which is then further processed into sulfuric acid (the catalyst is not modelled), sulfur burning also supplies the necessary electricy on site	4.47	sulfur
tailings, from HPAL	-14.2577	HPAL_CHA	CHA	kilogram		technosphere	-(mass_laterite_concentrate_input_HPAL * ((ore_grade_laterite * (1 - purification_recovery_efficiency_HPAL) + (1 - ore_grade_laterite) * intermediate_MHP_grade)))		-1
Activity	refining, MHP leaching
allocation	manual
code	db2dd9a748b7490789b1993c7418432d
comment	From Roy et al. (2025), leaching of the MHP. Mass allocation is used and rounded to two decimals. It is assumed that both recovery efficiencies increase simultaneous so that the mass allocation factor is static over time.
id	2.16906e+17
location	CHA
type	multifunctional
Parameters	216905749033426948
name	amount	formula	code	database
dummy_parameter	1		db2dd9a748b7490789b1993c7418432d	HPAL_CHA
Exchanges
name	amount	database	location	unit	categories	type	formula	comment	original_amount	reference product
Carbon dioxide, fossil	0.0132	biosphere3		kilogram	air	biosphere	0.0132 * (1 - energy_efficiency_improvement)		1
Water, unspecified natural origin	0.0022	biosphere3		cubic meter	natural resource::in ground	biosphere	0.0022 * (1 - material_efficiency_improvement)	process medium	0.0022
cobalt cathode, >99.9%	0.086	HPAL_CHA	CHA	kilogram		production
final product, nickel sulfate	1	HPAL_CHA	CHA	kilogram		production
intermediate, mixed hydroxide precipitate (MHP)	0.270499	HPAL_CHA	CHA	kilogram		technosphere	final_product_grade / (refining_recovery_efficiency_HPAL * intermediate_MHP_grade) * sulfuric_acid_plant_on_site_share_CHA		1
intermediate, mixed hydroxide precipitate (MHP)	0.270499	HPAL_CHA	CHA	kilogram		technosphere	final_product_grade / (refining_recovery_efficiency_HPAL * intermediate_MHP_grade) * (1-sulfuric_acid_plant_on_site_share_CHA)		1
market for sodium hydroxide, without water, in 50% solution state	0.079	superstrucutre_Ni_case_study_2050only	RoW	kilogram		technosphere	0.079 * (1 - material_efficiency_improvement)	for neutralization and impurity removal	0.079	sodium hydroxide, without water, in 50% solution state
market for sulfuric acid	0.64	superstrucutre_Ni_case_study_2050only	RoW	kilogram		technosphere	0.64 * (1 - material_efficiency_improvement)	for leaching	0.64	sulfuric acid
market group for electricity, high voltage	0.62	superstrucutre_Ni_case_study_2050only	CHA	kilowatt hour		technosphere	0.62 * (1 - energy_efficiency_improvement) + 0.44/3.6 * (1 - energy_efficiency_improvement) * electrification_of_equipment	for electrolysis (separating/producing cobalt) and electrification of double-effect evaporation	1	electricity, high voltage
market group for heat, district or industrial, natural gas	0.44	superstrucutre_Ni_case_study_2050only	GLO	megajoule		technosphere	0.44 * (1 - energy_efficiency_improvement) * (1 - electrification_of_equipment)	for double-effect evaporation	0.44	heat, district or industrial, natural gas
Activity	tailings management, from HPAL
allocation	equal
code	e049afc3f2224eedb797af0203bc4ab4
comment	From Roy et al. (2025)
id	2.16906e+17
location	CHA
type	process
Exchanges
name	amount	database	location	unit	categories	type
Aluminium III	0.01348	biosphere3		kilogram	water::ground-, long-term	biosphere
Aluminium III	4.0744e-05	biosphere3		kilogram	water::ground-	biosphere
Antimony ion	2.0319e-08	biosphere3		kilogram	water::ground-, long-term	biosphere
Antimony ion	1.2102e-10	biosphere3		kilogram	water::ground-	biosphere
Arsenic ion	3.1909e-09	biosphere3		kilogram	water::ground-	biosphere
Arsenic ion	5.7275e-07	biosphere3		kilogram	water::ground-, long-term	biosphere
Barium II	5.4844e-10	biosphere3		kilogram	water::ground-	biosphere
Barium II	2.0344e-05	biosphere3		kilogram	water::ground-, long-term	biosphere
Beryllium II	1.927e-07	biosphere3		kilogram	water::ground-, long-term	biosphere
Beryllium II	2.2975e-09	biosphere3		kilogram	water::ground-	biosphere
Boron	8.9636e-07	biosphere3		kilogram	water::ground-, long-term	biosphere
Boron	5.2078e-09	biosphere3		kilogram	water::ground-	biosphere
Cadmium II	1.6422e-09	biosphere3		kilogram	water::ground-	biosphere
Cadmium II	1.0236e-07	biosphere3		kilogram	water::ground-, long-term	biosphere
Calcium II	0.04624	biosphere3		kilogram	water::ground-, long-term	biosphere
Calcium II	0.00394	biosphere3		kilogram	water::ground-	biosphere
Chromium VI	2.4999e-06	biosphere3		kilogram	water::ground-	biosphere
Chromium VI	0.00047	biosphere3		kilogram	water::ground-, long-term	biosphere
Cobalt II	0.00085	biosphere3		kilogram	water::ground-, long-term	biosphere
Cobalt II	3.7943e-05	biosphere3		kilogram	water::ground-	biosphere
Copper ion	1.4634e-07	biosphere3		kilogram	water::ground-	biosphere
Copper ion	6.6804e-05	biosphere3		kilogram	water::ground-, long-term	biosphere
Iron ion	0.30743	biosphere3		kilogram	water::ground-, long-term	biosphere
Iron ion	0.00067	biosphere3		kilogram	water::ground-	biosphere
Lead II	9.0954e-07	biosphere3		kilogram	water::ground-, long-term	biosphere
Lead II	4.5626e-10	biosphere3		kilogram	water::ground-	biosphere
Magnesium	0.00078	biosphere3		kilogram	water::ground-	biosphere
Magnesium	0.00903	biosphere3		kilogram	water::ground-, long-term	biosphere
Manganese II	0.00024	biosphere3		kilogram	water::ground-	biosphere
Manganese II	0.00737	biosphere3		kilogram	water::ground-, long-term	biosphere
Mercury II	4.7249e-08	biosphere3		kilogram	water::ground-, long-term	biosphere
Mercury II	2.0108e-10	biosphere3		kilogram	water::ground-	biosphere
Molybdenum VI	1.5676e-08	biosphere3		kilogram	water::ground-	biosphere
Molybdenum VI	3.0931e-07	biosphere3		kilogram	water::ground-, long-term	biosphere
Nickel II	0.00451	biosphere3		kilogram	water::ground-, long-term	biosphere
Nickel II	6.4237e-05	biosphere3		kilogram	water::ground-	biosphere
Occupation, dump site	0.0011	biosphere3		square meter-year	natural resource::land	biosphere
Potassium I	4.2118e-08	biosphere3		kilogram	water::ground-	biosphere
Potassium I	1.6448e-05	biosphere3		kilogram	water::ground-, long-term	biosphere
Scandium	6.3972e-05	biosphere3		kilogram	water::ground-, long-term	biosphere
Scandium	8.9817e-07	biosphere3		kilogram	water::ground-	biosphere
Selenium IV	1.8771e-09	biosphere3		kilogram	water::ground-	biosphere
Selenium IV	2.682e-07	biosphere3		kilogram	water::ground-, long-term	biosphere
Silicon	5.1797e-05	biosphere3		kilogram	water::ground-	biosphere
Silicon	0.01044	biosphere3		kilogram	water::ground-, long-term	biosphere
Silver I	6.0994e-10	biosphere3		kilogram	water::ground-	biosphere
Silver I	1.1434e-06	biosphere3		kilogram	water::ground-, long-term	biosphere
Sodium I	7.9988e-05	biosphere3		kilogram	water::ground-	biosphere
Sodium I	0.00179	biosphere3		kilogram	water::ground-, long-term	biosphere
Strontium II	1.4157e-07	biosphere3		kilogram	water::ground-	biosphere
Strontium II	2.2153e-05	biosphere3		kilogram	water::ground-, long-term	biosphere
Thallium I	1.2989e-07	biosphere3		kilogram	water::ground-, long-term	biosphere
Thallium I	1.0951e-10	biosphere3		kilogram	water::ground-	biosphere
Tin ion	8.4101e-07	biosphere3		kilogram	water::ground-, long-term	biosphere
Tin ion	3.9866e-09	biosphere3		kilogram	water::ground-	biosphere
Titanium ion	3.2148e-08	biosphere3		kilogram	water::ground-	biosphere
Titanium ion	0.00019	biosphere3		kilogram	water::ground-, long-term	biosphere
Transformation, from unspecified, natural (non-use)	8.4416e-06	biosphere3		square meter	natural resource::land	biosphere
Transformation, to dump site	8.4416e-06	biosphere3		square meter	natural resource::land	biosphere
Tungsten	3.6785e-09	biosphere3		kilogram	water::ground-	biosphere
Tungsten	3.2915e-07	biosphere3		kilogram	water::ground-, long-term	biosphere
Vanadium V	1.6669e-06	biosphere3		kilogram	water::ground-, long-term	biosphere
Vanadium V	8.358e-09	biosphere3		kilogram	water::ground-	biosphere
Zinc II	1.7277e-06	biosphere3		kilogram	water::ground-, long-term	biosphere
Zinc II	8.5372e-05	biosphere3		kilogram	water::ground-	biosphere
tailings, from HPAL	-1	HPAL_CHA	CHA	kilogram		production
Activity	tailings, from HPAL
code	f98bce51b2fc452aae8965ab7dcddabb
id	2.16906e+17
location	CHA
processor	HPAL_CHA::e049afc3f2224eedb797af0203bc4ab4
type	waste
unit	kilogram
Exchanges

## Sheet: FS_CAZ
Project parameters
name	amount	formula
ore_grade_laterite	0.0122
ore_grade_sulfide	0.028
intermediate_MHP_grade	0.4087
purification_recovery_efficiency_HPAL	0.95
final_product_grade	0.22
refining_recovery_efficiency_HPAL	0.995
mass_laterite_concentrate_input_HPAL	35.2632	intermediate_MHP_grade / (purification_recovery_efficiency_HPAL * ore_grade_laterite)
mine_electrification	0
technology_adaption_HPGR	0
energy_efficiency_gain_HPGR	0.3
energy_efficiency_improvement	0
material_efficiency_improvement	0
intermediate_FeNi_grade	0.029
purification_recovery_efficiency_RKEF	0.88
refining_recovery_efficiency_RKEF	0.995
technology_adaption_electric_drying	0
intermediate_nickel_class_I_grade	1
refining_recovercy_efficiency_FS	0.99
intermediate_converter_nickel_matte_grade	0.78
concentrate_grade_FS	0.16
purification_recovery_efficiency_FS	0.9
concentration_recovery_efficiency_sulphide_ore	0.79
mass_sulphide_ore_input	7.23327	concentrate_grade_FS / (concentration_recovery_efficiency_sulphide_ore * ore_grade_sulfide)
ore_grade_sulfide_cobalt	0.002
purification_recovery_efficiency_FS_cobalt	0.23
refining_recovery_efficiency_FS_cobalt	0.98
technology_adaption_hydrogen_as_reductant	0
sulfuric_acid_plant_on_site_share_CHA	0.5
electrification_of_equipment	0
Database	FS_CAZ
default_allocation	equal
format	Copied from 'FS_CA'
read_only	0
Activity	cobalt
allocation_factor	0.02
code	9b15ca90554d4d249b2412d34b024fdb
id	2.16904e+17
location	CAZ
processor	FS_CAZ::51a3ab09e59a49be8953aad878c18b4e
type	product
unit	kilogram
Exchanges
Activity	concentrate, from nickel sulphide ore
code	fc72fc0a166c4833b31ef10d739ffd53
id	2.16904e+17
location	CAZ
processor	FS_CAZ::9cc3a173489b400aa44b08f4ed5f93e0
type	product
unit	kilogram
Exchanges
Activity	final product, nickel sulfate
code	cba52ab907b147cb999ec1ce9f45fca6
id	2.16904e+17
location	CAZ
processor	FS_CAZ::db174eab2a6f46b794b0804219e8788b
type	product
unit	kilogram
Exchanges
Activity	intermediate, nickel class I
allocation_factor	0.98
code	1c8923cf85c1452ea09e0131af11ce8c
id	2.16904e+17
location	CAZ
processor	FS_CAZ::51a3ab09e59a49be8953aad878c18b4e
type	product
unit	kilogram
Exchanges
Activity	intermediate, nickel matte
allocation_factor	1
code	8db0b964e38241cab9427d6b6ab0b9ce
id	2.16904e+17
location	CAZ
processor	FS_CAZ::553bcb03eea843f59213eb0d62af8583
type	product
unit	kilogram
Exchanges
Activity	mining and concentration, nickel sulphide
allocation	equal
code	9cc3a173489b400aa44b08f4ed5f93e0
comment	Copy of ecoinvent 3.11 - cutoff "nickel mine operation and benefication to nickel concentrate, 16% Ni" CA-QC. Energy inputs are adjusted using data from Eckelmann (2010).
id	2.16904e+17
location	CAZ
type	process
Parameters	216903849215041536
name	amount	formula	code	database
dummy_parameter	1		9cc3a173489b400aa44b08f4ed5f93e0	FS_CAZ
Exchanges
name	amount	database	location	unit	categories	type	formula	comment	original_amount	reference product
Arsenic ion	[ecoinvent placeholder]	biosphere3		kilogram	water::surface water	biosphere
Arsenic ion	[ecoinvent placeholder]	biosphere3		kilogram	air::non-urban air or from high stacks	biosphere
Cadmium II	[ecoinvent placeholder]	biosphere3		kilogram	water::surface water	biosphere
Chromium III	[ecoinvent placeholder]	biosphere3		kilogram	water::surface water	biosphere
Cobalt	[ecoinvent placeholder]	biosphere3		kilogram	natural resource::in ground	biosphere
Cobalt II	[ecoinvent placeholder]	biosphere3		kilogram	water::surface water	biosphere
Copper	[ecoinvent placeholder]	biosphere3		kilogram	natural resource::in ground	biosphere
Copper ion	[ecoinvent placeholder]	biosphere3		kilogram	water::surface water	biosphere
Dinitrogen monoxide	[ecoinvent placeholder]	biosphere3		kilogram	air::non-urban air or from high stacks	biosphere
Gangue	[ecoinvent placeholder]	biosphere3		kilogram	natural resource::in ground	biosphere	(mass_sulphide_ore_input - 1) - ore_grade_sulfide * mass_sulphide_ore_input		7.75861
Gangue	[ecoinvent placeholder]	biosphere3		kilogram	natural resource::in ground	biosphere
Gold	[ecoinvent placeholder]	biosphere3		kilogram	natural resource::in ground	biosphere
Lead II	[ecoinvent placeholder]	biosphere3		kilogram	air::non-urban air or from high stacks	biosphere
Lead II	[ecoinvent placeholder]	biosphere3		kilogram	water::surface water	biosphere
Manganese II	[ecoinvent placeholder]	biosphere3		kilogram	air::non-urban air or from high stacks	biosphere
Manganese II	[ecoinvent placeholder]	biosphere3		kilogram	water::surface water	biosphere
Mercury II	[ecoinvent placeholder]	biosphere3		kilogram	air::non-urban air or from high stacks	biosphere
Mercury II	[ecoinvent placeholder]	biosphere3		kilogram	water::surface water	biosphere
Methane, fossil	[ecoinvent placeholder]	biosphere3		kilogram	air::non-urban air or from high stacks	biosphere
Nickel	[ecoinvent placeholder]	biosphere3		kilogram	natural resource::in ground	biosphere	concentrate_grade_FS / concentration_recovery_efficiency_sulphide_ore		1
Nickel II	[ecoinvent placeholder]	biosphere3		kilogram	water::surface water	biosphere
Nitrate	[ecoinvent placeholder]	biosphere3		kilogram	water::surface water	biosphere
Occupation, industrial area	[ecoinvent placeholder]	biosphere3		square meter-year	natural resource::land	biosphere
Palladium	[ecoinvent placeholder]	biosphere3		kilogram	natural resource::in ground	biosphere
Phosphorus	[ecoinvent placeholder]	biosphere3		kilogram	water::surface water	biosphere
Platinum	[ecoinvent placeholder]	biosphere3		kilogram	natural resource::in ground	biosphere
Rhodium	[ecoinvent placeholder]	biosphere3		kilogram	natural resource::in ground	biosphere
Silver	[ecoinvent placeholder]	biosphere3		kilogram	natural resource::in ground	biosphere
Transformation, from unspecified	[ecoinvent placeholder]	biosphere3		square meter	natural resource::land	biosphere
Transformation, to industrial area	[ecoinvent placeholder]	biosphere3		square meter	natural resource::land	biosphere
Water, river	[ecoinvent placeholder]	biosphere3		cubic meter	natural resource::in water	biosphere
Zinc II	[ecoinvent placeholder]	biosphere3		kilogram	water	biosphere
concentrate, from nickel sulphide ore	1	FS_CAZ	CAZ	kilogram		production
market for ammonium nitrate	[ecoinvent placeholder]	superstrucutre_Ni_case_study_2050only	RNA	kilogram		technosphere	[ecoinvent placeholder] * ore_grade_sulfide/0.028 * (1 -material_efficiency_improvement)		1	ammonium nitrate
market for carboxymethyl cellulose, powder	[ecoinvent placeholder]	superstrucutre_Ni_case_study_2050only	GLO	kilogram		technosphere	[ecoinvent placeholder] * ore_grade_sulfide/0.028 * (1 -material_efficiency_improvement)		1	carboxymethyl cellulose, powder
market for cement, CEM II/B	[ecoinvent placeholder]	superstrucutre_Ni_case_study_2050only	CAZ	kilogram		technosphere	[ecoinvent placeholder] * ore_grade_sulfide/0.028 * (1 -material_efficiency_improvement)		1	cement, CEM II/B
market for chemical, inorganic	[ecoinvent placeholder]	superstrucutre_Ni_case_study_2050only	GLO	kilogram		technosphere	[ecoinvent placeholder] * ore_grade_sulfide/0.028 * (1 -material_efficiency_improvement)		1	chemical, inorganic
market for diesel, burned in building machine	[ecoinvent placeholder]	superstrucutre_Ni_case_study_2050only	CAZ	megajoule		technosphere	(1.95 / (1.95 + 0.166)) * [ecoinvent placeholder] * mass_sulphide_ore_input * (1 - energy_efficiency_improvement) * (1 - mine_electrification)		1	diesel, burned in building machine
market for diesel, burned in diesel-electric generating set, 10MW	[ecoinvent placeholder]	superstrucutre_Ni_case_study_2050only	CAZ	megajoule		technosphere	(0.166 / (1.95 + 0.166)) * [ecoinvent placeholder] * mass_sulphide_ore_input * (1 - energy_efficiency_improvement) * (1 - mine_electrification)		1	diesel, burned in diesel-electric generating set, 10MW
market for diesel, low-sulfur	[ecoinvent placeholder]	superstrucutre_Ni_case_study_2050only	CAZ	kilogram		technosphere	[ecoinvent placeholder] * ore_grade_sulfide/0.028 * (1 -material_efficiency_improvement)		1	diesel, low-sulfur
market for ethylene glycol	[ecoinvent placeholder]	superstrucutre_Ni_case_study_2050only	RoW	kilogram		technosphere	[ecoinvent placeholder] * ore_grade_sulfide/0.028 * (1 -material_efficiency_improvement)		1	ethylene glycol
market for foaming agent	[ecoinvent placeholder]	superstrucutre_Ni_case_study_2050only	GLO	kilogram		technosphere	[ecoinvent placeholder] * ore_grade_sulfide/0.028 * (1 -material_efficiency_improvement)		1	foaming agent
market for lime, hydrated, packed	[ecoinvent placeholder]	superstrucutre_Ni_case_study_2050only	RoW	kilogram		technosphere	[ecoinvent placeholder] * 0.028/ore_grade_sulfide * (1 -material_efficiency_improvement)		1	lime, hydrated, packed
market for lubricating oil	[ecoinvent placeholder]	superstrucutre_Ni_case_study_2050only	RoW	kilogram		technosphere	[ecoinvent placeholder] * 0.028/ore_grade_sulfide * (1 -material_efficiency_improvement)		1	lubricating oil
market for polyacrylamide	[ecoinvent placeholder]	superstrucutre_Ni_case_study_2050only	GLO	kilogram		technosphere	[ecoinvent placeholder] * 0.028/ore_grade_sulfide * (1 -material_efficiency_improvement)		1	polyacrylamide
market for sand	[ecoinvent placeholder]	superstrucutre_Ni_case_study_2050only	RoW	kilogram		technosphere	[ecoinvent placeholder] * 0.028/ore_grade_sulfide * (1 -material_efficiency_improvement)		1	sand
market for soda ash, dense	[ecoinvent placeholder]	superstrucutre_Ni_case_study_2050only	GLO	kilogram		technosphere	[ecoinvent placeholder] * 0.028/ore_grade_sulfide * (1 -material_efficiency_improvement)		1	soda ash, dense
market for sulfidic tailings, from nickel mine operation	-6.23327	superstrucutre_Ni_case_study_2050only	CA	kilogram		technosphere	-(mass_sulphide_ore_input - 1)		1	sulfidic tailings, from nickel mine operation
market group for electricity, high voltage	0.713281	superstrucutre_Ni_case_study_2050only	CAZ	kilowatt hour		technosphere	mass_sulphide_ore_input * ((0.149+0.200 * ((1 - technology_adaption_HPGR) + (1 - energy_efficiency_gain_HPGR) * technology_adaption_HPGR))/3.6 * (1 - energy_efficiency_improvement) + 0.066/3.6 * (1 - mine_electrification))		1	electricity, high voltage
Activity	purification, FS
allocation	manual
code	553bcb03eea843f59213eb0d62af8583
comment	Inventory is based on Wei et al. (2020) and scaled to 1 kg of nickel matte after converter furnace (78% nickel content). The nickel content in the nickel metall after the sherrit-gordon process is assumed to be 100% and the respective recovery efficiency 99%. Wei et al. (2020) use stoichometric equations to claculate material demand (whcih includes reductants). These calcualtions assume perfect c…
id	2.16904e+17
location	CAZ
type	multifunctional
Exchanges
name	amount	database	location	unit	type	formula	comment	original_amount	reference product
intermediate, nickel matte	1	FS_CAZ	CAZ	kilogram	production
sulfuric acid	4.04	FS_CAZ	CAZ	kilogram	production
concentrate, from nickel sulphide ore	5.41667	FS_CAZ	CAZ	kilogram	technosphere	intermediate_converter_nickel_matte_grade / purification_recovery_efficiency_FS / concentrate_grade_FS		1
heat production, at coal coke industrial furnace 1-10MW	6.958	superstrucutre_Ni_case_study_2050only	CA-QC	megajoule	technosphere	6.958	heat from coke as reducant used in settling furnace	1	heat, district or industrial, other than natural gas
heat production, at hard coal industrial furnace 1-10MW	8.664	superstrucutre_Ni_case_study_2050only	CA-QC	megajoule	technosphere	8.664	heat from coke as reductant used in flash smelting	1	heat, district or industrial, other than natural gas
heat production, light fuel oil, at industrial furnace 1MW	4.819	superstrucutre_Ni_case_study_2050only	CAZ	megajoule	technosphere	4.819 * (1 - energy_efficiency_improvement)	flash smelting furnace fuel	1	heat, district or industrial, other than natural gas
heat production, natural gas, at industrial furnace >100kW	6.332	superstrucutre_Ni_case_study_2050only	CAZ	megajoule	technosphere	6.332 * (1 - energy_efficiency_improvement) * (1 - technology_adaption_electric_drying)	drying before flash smelting	1	heat, district or industrial, natural gas
industrial gases production, cryogenic air separation	0.378	superstrucutre_Ni_case_study_2050only	CAZ	kilogram	technosphere	0.378	for flash smelting and for the converter furnace	1	oxygen, liquid
market for hydrogen, gaseous, low pressure	0	superstrucutre_Ni_case_study_2050only	CAZ	kilogram	technosphere	(8.664 / 28.9) * 0.85 * (2/12) * technology_adaption_hydrogen_as_reductant	for switching the reductant to hydrogen instead of coal, 28.9 Mj/kg heating value of coke, 85% carbon content of coke (both taken from ecoinvent process coke as input to heat, district or industrial, other than natural gas), 2 g/mol H2, 12 g/mol C	1	hydrogen, gaseous, low pressure
market for silica sand	1.727	superstrucutre_Ni_case_study_2050only	GLO	kilogram	technosphere	1.727	slag removal in flash smelting	1	silica sand
market for silica sand	0.226	superstrucutre_Ni_case_study_2050only	GLO	kilogram	technosphere	0.226	slag removal in converter furnace	1	silica sand
market group for electricity, high voltage	0.541	superstrucutre_Ni_case_study_2050only	CAZ	kilowatt hour	technosphere	0.541 * (1 - energy_efficiency_improvement)	for settling furnace	1	electricity, high voltage
market group for electricity, high voltage	0	superstrucutre_Ni_case_study_2050only	CAZ	kilowatt hour	technosphere	(6.332 * (1 - energy_efficiency_improvement) / 3.6) * technology_adaption_electric_drying	for electrification of drying process	1	electricity, high voltage
Activity	refining, nickel class I leaching
allocation	equal
code	db174eab2a6f46b794b0804219e8788b
comment	Copy of ecoinvent 3.11 - undefined process "nickel sulfate production" GLO and adaption to specific region.
id	2.16904e+17
location	CAZ
type	process
Exchanges
name	amount	database	location	unit	categories	type	formula	original_amount	reference product
Nickel II	0.0021	biosphere3		kilogram	water	biosphere	0.00210	1
Sulfur	0.00115	biosphere3		kilogram	water	biosphere	0.00115 * (1 - material_efficiency_improvement)	1
Water	0.00147	biosphere3		cubic meter	air	biosphere	0.00147 * (1 - material_efficiency_improvement)	0.00147
Water, cooling, unspecified natural origin	0.0147	biosphere3		cubic meter	natural resource::in water	biosphere	0.0147 * (1 - material_efficiency_improvement)	1
Water, river	0.000965	biosphere3		cubic meter	natural resource::in water	biosphere	0.000965 * (1 - material_efficiency_improvement)	0.000965
Water, well, in ground	0.000817	biosphere3		cubic meter	natural resource::in water	biosphere	0.000817 * (1 - material_efficiency_improvement)	0.000817
final product, nickel sulfate	1	FS_CAZ	CAZ	kilogram		production
intermediate, nickel class I	0.399	FS_CAZ	CAZ	kilogram		technosphere
market for chemical factory, organics	4e-10	superstrucutre_Ni_case_study_2050only	GLO	unit		technosphere			chemical factory, organics
market for heat, from steam, in chemical industry	0.0311	superstrucutre_Ni_case_study_2050only	CAZ	megajoule		technosphere	0.0311 * (1 - energy_efficiency_improvement)	1	heat, from steam, in chemical industry
market for sulfuric acid	0.0773	superstrucutre_Ni_case_study_2050only	RoW	kilogram		technosphere	0.0773 * (1 -material_efficiency_improvement)	1	sulfuric acid
market for wastewater, average	2.28e-06	superstrucutre_Ni_case_study_2050only	CA-QC	cubic meter		technosphere	0.00000228 * (1 - material_efficiency_improvement)	-2.28e-06	wastewater, average
market group for electricity, medium voltage	0.399	superstrucutre_Ni_case_study_2050only	GLO	kilowatt hour		technosphere	0.399 * (1 - energy_efficiency_improvement)	1	electricity, medium voltage
market group for heat, district or industrial, natural gas	1.89	superstrucutre_Ni_case_study_2050only	GLO	megajoule		technosphere	1.89 * (1 - energy_efficiency_improvement)	1	heat, district or industrial, natural gas
Activity	refining, sherrit-gordon process
allocation	manual
code	51a3ab09e59a49be8953aad878c18b4e
comment	From Roy et al. (2025). The Sherrit-gordon process uses ammonia pressure leaching with hydrogen reduction to precipitate nickel metallic powder. Mass allocation is used and rounded to two decimals. It is assumed that both recovery efficiencies increase simultaneous so that the mass allocation factor is static over time.
id	2.16904e+17
location	CAZ
type	multifunctional
Parameters	216903849223430144
name	amount	formula	code	database
dummy_parameter	1		51a3ab09e59a49be8953aad878c18b4e	FS_CAZ
Exchanges
name	amount	database	location	unit	type	formula	comment	original_amount	reference product
cobalt	0.0248616	FS_CAZ	CAZ	kilogram	production	55.15 * ore_grade_sulfide_cobalt * purification_recovery_efficiency_FS_cobalt * refining_recovery_efficiency_FS_cobalt		1
intermediate, nickel class I	1	FS_CAZ	CAZ	kilogram	production
heat production, natural gas, at industrial furnace >100kW	18.5	superstrucutre_Ni_case_study_2050only	CAZ	megajoule	technosphere	18.5 * (1 - energy_efficiency_improvement) * (1 - electrification_of_equipment)	for autoclave and hydrogen reduction heat supply	1	heat, district or industrial, natural gas
intermediate, nickel matte	1.295	FS_CAZ	CAZ	kilogram	technosphere	intermediate_nickel_class_I_grade / refining_recovercy_efficiency_FS / intermediate_converter_nickel_matte_grade		1
market for ammonia, anhydrous, liquid	0.637	superstrucutre_Ni_case_study_2050only	RoW	kilogram	technosphere	0.637	for pressure leaching	1	ammonia, anhydrous, liquid
market for hydrogen, gaseous, low pressure	0.07	superstrucutre_Ni_case_study_2050only	CAZ	kilogram	technosphere	0.07	for reduction/precipitation of pregnant leach solution to metallic powder	1	hydrogen, gaseous, low pressure
market group for electricity, high voltage	2.9	superstrucutre_Ni_case_study_2050only	CAZ	kilowatt hour	technosphere	2.9 * (1 - energy_efficiency_improvement) + 18.5/3.6 * (1 - energy_efficiency_improvement) * electrification_of_equipment	for pumping, filtering, compressing and other auxiliar processes and for electrification of thermal heat supply to autoclave and hydrogen reduction	1	electricity, high voltage
Activity	sulfuric acid
allocation_factor	0
code	0567cc22e97344d880d813a98360c896
id	2.16904e+17
location	CAZ
processor	FS_CAZ::553bcb03eea843f59213eb0d62af8583
type	product
unit	kilogram
Exchanges

## Sheet: RePyro_WORLD
Project parameters
name	amount	formula
ore_grade_laterite	0.0122
ore_grade_sulfide	0.028
intermediate_MHP_grade	0.4087
purification_recovery_efficiency_HPAL	0.95
final_product_grade	0.22
refining_recovery_efficiency_HPAL	0.995
mass_laterite_concentrate_input_HPAL	35.2632	intermediate_MHP_grade / (purification_recovery_efficiency_HPAL * ore_grade_laterite)
mine_electrification	0
technology_adaption_HPGR	0
energy_efficiency_gain_HPGR	0.3
energy_efficiency_improvement	0
material_efficiency_improvement	0
intermediate_FeNi_grade	0.029
purification_recovery_efficiency_RKEF	0.88
refining_recovery_efficiency_RKEF	0.995
technology_adaption_electric_drying	0
intermediate_nickel_class_I_grade	1
refining_recovercy_efficiency_FS	0.99
intermediate_converter_nickel_matte_grade	0.78
concentrate_grade_FS	0.16
purification_recovery_efficiency_FS	0.9
concentration_recovery_efficiency_sulphide_ore	0.79
mass_sulphide_ore_input	7.23327	concentrate_grade_FS / (concentration_recovery_efficiency_sulphide_ore * ore_grade_sulfide)
ore_grade_sulfide_cobalt	0.002
purification_recovery_efficiency_FS_cobalt	0.23
refining_recovery_efficiency_FS_cobalt	0.98
technology_adaption_hydrogen_as_reductant	0
sulfuric_acid_plant_on_site_share_CHA	0.5
electrification_of_equipment	0
Database	RePyro_WORLD
default_allocation	equal
format	Copied from 'RePyro_GLO'
read_only	0
Activity	aluminium scrap
allocation_factor	0.007
code	fed6c6bf05e040ecbe66616328033af0
id	2.16904e+17
location	World
processor	RePyro_WORLD::d34eff32f96846f2a8cac852856af17f
type	product
unit	kilogram
Exchanges
Activity	cobalt sulfate
allocation_factor	0.237
code	dcb91ccebf7048c4a4cdf9ab9b43856a
id	2.16904e+17
location	World
processor	RePyro_WORLD::d34eff32f96846f2a8cac852856af17f
type	product
unit	kilogram
Exchanges
Activity	collected spent battery pack
allocation_factor	1
code	03a55002cf5a42ca8dda646770f81eed
id	2.16904e+17
location	World
processor	RePyro_WORLD::ac71ded40a56461cb19542262bd30bac
type	product
unit	kilogram
Exchanges
Activity	collection, spent Li-ion battery pack
allocation	manual
code	ac71ded40a56461cb19542262bd30bac
comment	Inventory for collection and sorting of spent Li-ion battery cell packs from Kallitsis et al. (2022).
id	2.16904e+17
location	World
type	multifunctional
Exchanges
name	amount	database	location	unit	type	formula	comment	original_amount	reference product
collected spent battery pack	1	RePyro_WORLD	World	kilogram	production
spent battery pack, at end-user	-1	RePyro_WORLD	World	kilogram	production
market group for electricity, medium voltage	0.0024	superstrucutre_Ni_case_study_2050only	World	kilowatt hour	technosphere	0.0024 * (1 - energy_efficiency_improvement)	for conveyer belt and forklift operation	0.0024	electricity, medium voltage
transport, freight, lorry, unspecified, long haul	0.174	superstrucutre_Ni_case_study_2050only	World	ton kilometer	technosphere		transport proxy		transport, freight, lorry
transport, freight, train, unspecified	0.688	superstrucutre_Ni_case_study_2050only	World	ton kilometer	technosphere		transport proxy		transport, freight, train
Activity	copper scrap
allocation_factor	0.291
code	961843b65bb14ec2ae5490a972934998
id	2.16904e+17
location	World
processor	RePyro_WORLD::d34eff32f96846f2a8cac852856af17f
type	product
unit	kilogram
Exchanges
Activity	discharged Li-ion battery cell
code	485bb2127d874fcca9bbf02f7e7e2a88
id	2.16904e+17
location	World
processor	RePyro_WORLD::89857aee5dbc4a789a9b08992c2ab969
type	product
unit	kilogram
Exchanges
Activity	manganese sulfate
allocation_factor	0.23
code	a49d690e68bd43298c55cdd1c6480553
id	2.16904e+17
location	World
processor	RePyro_WORLD::d34eff32f96846f2a8cac852856af17f
type	product
unit	kilogram
Exchanges
Activity	nickel sulfate
allocation_factor	0.235
code	30d3f1d1b88c4e6e8e144dfdbdf690a4
id	2.16904e+17
location	World
processor	RePyro_WORLD::d34eff32f96846f2a8cac852856af17f
type	product
unit	kilogram
Exchanges
Activity	pre-treatment, collected Li-ion battery pack
allocation	equal
code	89857aee5dbc4a789a9b08992c2ab969
comment	Inventory from Kallitsis et al. (2022). The inventory entails the processes of dismanteling the battery to extract the battery cell and subsequently discharging them.
id	2.16904e+17
location	World
type	process
Exchanges
name	amount	database	location	unit	categories	type	formula	comment	original_amount	reference product
Water, unspecified natural origin	0.003	biosphere3		cubic meter	natural resource::in water	biosphere
discharged Li-ion battery cell	1	RePyro_WORLD	World	kilogram		production
collected spent battery pack	1.66667	RePyro_WORLD	World	kilogram		technosphere	1/0.6		1
market for chemical, organic	0.022	superstrucutre_Ni_case_study_2050only	GLO	kilogram		technosphere	0.022 * (1 - material_efficiency_improvement)	proxy for FeSO4 solution used for quick discharge device	0.022	chemical, organic
market for conveyor belt	3.4e-07	superstrucutre_Ni_case_study_2050only	GLO	meter		technosphere				conveyor belt
market for wastewater, average	-0.00302	superstrucutre_Ni_case_study_2050only	RoW	cubic meter		technosphere				wastewater, average
market group for electricity, medium voltage	0.07668	superstrucutre_Ni_case_study_2050only	World	kilowatt hour		technosphere	(0.27/3.6 + 0.0028*0.6) * (1 - energy_efficiency_improvement)	electricty for discharging and robotic disassmebly	1	electricity, medium voltage
Activity	purification and refining, pyrometallurgical treatment
allocation	manual
code	d34eff32f96846f2a8cac852856af17f
comment	Inventory taken from Kallitsis et al. (2022) based on Mohr et al. (2020) with NMC-111 cell chemsitry based on Ellingse et al. (2014). Recovery rates were not modelled as they are already high 93.6% (Mohr et al., 2020).
id	2.16904e+17
location	World
type	multifunctional
Parameters	216904082900688900
name	amount	formula	code	database
dummy_parameter	1		d34eff32f96846f2a8cac852856af17f	RePyro_WORLD
Exchanges
name	amount	database	location	unit	categories	type	formula	original_amount	reference product
Chloride	0.04	biosphere3		kilogram	water	biosphere
Particulate Matter, < 2.5 um	0.000104	biosphere3		kilogram	air	biosphere
Particulate Matter, > 10 um	0.000104	biosphere3		kilogram	air	biosphere
Particulate Matter, > 2.5 um and < 10um	9.36e-05	biosphere3		kilogram	air	biosphere
Sulfate	0.06	biosphere3		kilogram	water	biosphere
Sulfur dioxide	4.8e-05	biosphere3		kilogram	air	biosphere
Water	0.00015	biosphere3		cubic meter	air	biosphere
Water	0.00085	biosphere3		cubic meter	water	biosphere
Water, unspecified natural origin	0.001	biosphere3		cubic meter	natural resource::in ground	biosphere	0.001 * (1 - material_efficiency_improvement)	0.001
aluminium scrap	0.0537	RePyro_WORLD	World	kilogram		production
cobalt sulfate	0.173	RePyro_WORLD	World	kilogram		production
copper scrap	0.213	RePyro_WORLD	World	kilogram		production
manganese sulfate	0.168	RePyro_WORLD	World	kilogram		production
nickel sulfate	0.172	RePyro_WORLD	World	kilogram		production		0.172
discharged Li-ion battery cell	1	RePyro_WORLD	World	kilogram		technosphere
market for non-Fe-Co-metals, from used Li-ion battery, pyrometallurgical processing	-0.266	superstrucutre_Ni_case_study_2050only	GLO	kilogram		technosphere			non-Fe-Co-metals, from used Li-ion battery, pyrometallurgical processing
market for sodium hydroxide, without water, in 50% solution state	0.35	superstrucutre_Ni_case_study_2050only	RoW	kilogram		technosphere	0.35 * (1 - material_efficiency_improvement)	0.35	sodium hydroxide, without water, in 50% solution state
market for waste plastic, mixture	-0.0481	superstrucutre_Ni_case_study_2050only	RoW	kilogram		technosphere			waste plastic, mixture
market for waste plastic, mixture	-0.0481	superstrucutre_Ni_case_study_2050only	RoW	kilogram		technosphere			waste plastic, mixture
market group for electricity, medium voltage	0.8	superstrucutre_Ni_case_study_2050only	World	kilowatt hour		technosphere	2.88/3.6 * (1 - energy_efficiency_improvement)	1	electricity, medium voltage
Activity	spent battery pack, at end-user
allocation_factor	0
code	de903598e5f744f7a2b7a839b01c7fc5
id	2.16904e+17
location	World
processor	RePyro_WORLD::ac71ded40a56461cb19542262bd30bac
type	waste
unit	kilogram
Exchanges

## Sheet: ReHydro_WORLD
Project parameters
name	amount	formula
ore_grade_laterite	0.0122
ore_grade_sulfide	0.028
intermediate_MHP_grade	0.4087
purification_recovery_efficiency_HPAL	0.95
final_product_grade	0.22
refining_recovery_efficiency_HPAL	0.995
mass_laterite_concentrate_input_HPAL	35.2632	intermediate_MHP_grade / (purification_recovery_efficiency_HPAL * ore_grade_laterite)
mine_electrification	0
technology_adaption_HPGR	0
energy_efficiency_gain_HPGR	0.3
energy_efficiency_improvement	0
material_efficiency_improvement	0
intermediate_FeNi_grade	0.029
purification_recovery_efficiency_RKEF	0.88
refining_recovery_efficiency_RKEF	0.995
technology_adaption_electric_drying	0
intermediate_nickel_class_I_grade	1
refining_recovercy_efficiency_FS	0.99
intermediate_converter_nickel_matte_grade	0.78
concentrate_grade_FS	0.16
purification_recovery_efficiency_FS	0.9
concentration_recovery_efficiency_sulphide_ore	0.79
mass_sulphide_ore_input	7.23327	concentrate_grade_FS / (concentration_recovery_efficiency_sulphide_ore * ore_grade_sulfide)
ore_grade_sulfide_cobalt	0.002
purification_recovery_efficiency_FS_cobalt	0.23
refining_recovery_efficiency_FS_cobalt	0.98
technology_adaption_hydrogen_as_reductant	0
sulfuric_acid_plant_on_site_share_CHA	0.5
electrification_of_equipment	0
Database	ReHydro_WORLD
default_allocation	equal
format	Copied from 'ReHydro_GLO'
read_only	0
Activity	aluminium scrap
allocation_factor	0.006
code	556af93f2ccf443ba91a37b84d86f42e
id	2.16904e+17
location	World
processor	ReHydro_WORLD::cd29382a680f4a6681878362429d13a8
type	product
unit	kilogram
Exchanges
Activity	cobalt sulfate
allocation_factor	0.206
code	c8f8ff27fffc4302ae3350cae779c37a
id	2.16904e+17
location	World
processor	ReHydro_WORLD::cd29382a680f4a6681878362429d13a8
type	product
unit	kilogram
Exchanges
Activity	copper scrap
allocation_factor	0.284
code	6a6282359ca8414886049eea5b6d4268
id	2.16904e+17
location	World
processor	ReHydro_WORLD::cd29382a680f4a6681878362429d13a8
type	product
unit	kilogram
Exchanges
Activity	lithium hydroxide
allocation_factor	0.098
code	70a55fecba9846d4b1b6ab9137aa8bd3
id	2.16904e+17
location	World
processor	ReHydro_WORLD::cd29382a680f4a6681878362429d13a8
type	product
unit	kilogram
Exchanges
Activity	manganese sulfate
allocation_factor	0.2
code	d78033dd723e4eb18a70f6ac37bb4580
id	2.16904e+17
location	World
processor	ReHydro_WORLD::cd29382a680f4a6681878362429d13a8
type	product
unit	kilogram
Exchanges
Activity	nickel sulfate
allocation_factor	0.205
code	d745ab628faa41a1a00486a8d8713f9d
id	2.16904e+17
location	World
processor	ReHydro_WORLD::cd29382a680f4a6681878362429d13a8
type	product
unit	kilogram
Exchanges
Activity	purification and refining, hydrometallurgical treatment
allocation	manual
code	cd29382a680f4a6681878362429d13a8
comment	Inventory taken from Kallitsis et al. (2022) based on Mohr et al. (2020) with NMC-111 cell chemsitry based on Ellingse et al. (2014). Recovery rates were not modelled as they are already high 93.6% (Mohr et al., 2020).
id	2.16904e+17
location	World
type	multifunctional
Exchanges
name	amount	database	location	unit	categories	type	formula	comment	original_amount	reference product
Cobalt II	1.7e-08	biosphere3		kilogram	water	biosphere
Copper ion	1.65e-08	biosphere3		kilogram	water	biosphere
DOC, Dissolved Organic Carbon	1.11e-05	biosphere3		kilogram	water	biosphere
Dissolved solids	1.2e-05	biosphere3		kilogram	water	biosphere
Fluoride	3e-08	biosphere3		kilogram	water	biosphere
Hydrocarbons, unspecified	1e-07	biosphere3		kilogram	water::ground-	biosphere
NMVOC, non-methane volatile organic compounds	2.5e-06	biosphere3		kilogram	air	biosphere
Nickel II	1.65e-08	biosphere3		kilogram	water	biosphere
Sulfur dioxide	4.5e-06	biosphere3		kilogram	air	biosphere
Water	0.000612	biosphere3		cubic meter	water	biosphere
Water	0.00018	biosphere3		cubic meter	air	biosphere
Water, unspecified natural origin	0.00072	biosphere3		cubic meter	natural resource::in ground	biosphere	0.00072 * (1 - material_efficiency_improvement)		0.00072
aluminium scrap	0.0538	ReHydro_WORLD	World	kilogram		production
cobalt sulfate	0.173	ReHydro_WORLD	World	kilogram		production
copper scrap	0.238	ReHydro_WORLD	World	kilogram		production
lithium hydroxide	0.082	ReHydro_WORLD	World	kilogram		production
manganese sulfate	0.168	ReHydro_WORLD	World	kilogram		production
nickel sulfate	0.172	ReHydro_WORLD	World	kilogram		production
discharged Li-ion battery cell	1	RePyro_WORLD	World	kilogram		technosphere
lime production, hydrated, packed	0.116	superstrucutre_Ni_case_study_2050only	CH	kilogram		technosphere	0.116 * (1 - material_efficiency_improvement)		0.116	lime, hydrated, packed
market for chemical factory, organics	4e-10	superstrucutre_Ni_case_study_2050only	GLO	unit		technosphere				chemical factory, organics
market for chemical, inorganic	0.025	superstrucutre_Ni_case_study_2050only	GLO	kilogram		technosphere	0.025 * (1 - material_efficiency_improvement)		0.025	chemical, inorganic
market for inert waste, for final disposal	-0.202	superstrucutre_Ni_case_study_2050only	RoW	kilogram		technosphere				inert waste, for final disposal
market for non-Fe-Co-metals, from Li-ion battery, hydrometallurgical processing	-0.267	superstrucutre_Ni_case_study_2050only	GLO	kilogram		technosphere				non-Fe-Co-metals, from Li-ion battery, hydrometallurgical processing
market for sulfuric acid	0.213	superstrucutre_Ni_case_study_2050only	RoW	kilogram		technosphere	0.213 * (1 - material_efficiency_improvement)		0.213	sulfuric acid
market for waste gypsum	-0.339	superstrucutre_Ni_case_study_2050only	RoW	kilogram		technosphere				waste gypsum
market for waste plastic, mixture	-0.0481	superstrucutre_Ni_case_study_2050only	RoW	kilogram		technosphere				waste plastic, mixture
market group for electricity, medium voltage	0.14	superstrucutre_Ni_case_study_2050only	World	kilowatt hour		technosphere	0.504/3.6		1	electricity, medium voltage

## Sheet: market_nickel_sulfate
Project parameters
name	amount	formula
ore_grade_laterite	0.0122
ore_grade_sulfide	0.028
intermediate_MHP_grade	0.4087
purification_recovery_efficiency_HPAL	0.95
final_product_grade	0.22
refining_recovery_efficiency_HPAL	0.995
mass_laterite_concentrate_input_HPAL	35.2632	intermediate_MHP_grade / (purification_recovery_efficiency_HPAL * ore_grade_laterite)
mine_electrification	0
technology_adaption_HPGR	0
energy_efficiency_gain_HPGR	0.3
energy_efficiency_improvement	0
material_efficiency_improvement	0
intermediate_FeNi_grade	0.029
purification_recovery_efficiency_RKEF	0.88
refining_recovery_efficiency_RKEF	0.995
technology_adaption_electric_drying	0
intermediate_nickel_class_I_grade	1
refining_recovercy_efficiency_FS	0.99
intermediate_converter_nickel_matte_grade	0.78
concentrate_grade_FS	0.16
purification_recovery_efficiency_FS	0.9
concentration_recovery_efficiency_sulphide_ore	0.79
mass_sulphide_ore_input	7.23327	concentrate_grade_FS / (concentration_recovery_efficiency_sulphide_ore * ore_grade_sulfide)
ore_grade_sulfide_cobalt	0.002
purification_recovery_efficiency_FS_cobalt	0.23
refining_recovery_efficiency_FS_cobalt	0.98
technology_adaption_hydrogen_as_reductant	0
sulfuric_acid_plant_on_site_share_CHA	0.5
electrification_of_equipment	0
Database	market_nickel_sulfate
default_allocation	equal
read_only	0
Database parameters
name	amount	database
market_share_FS_CAZ	0.2	market_nickel_sulfate
market_share_FS_REF	0	market_nickel_sulfate
market_share_HPAL_CHA	0	market_nickel_sulfate
market_share_HPAL_OAS	0.3	market_nickel_sulfate
market_share_RKEF_CHA	0	market_nickel_sulfate
market_share_RKEF_OAS	0.3	market_nickel_sulfate
market_share_ReHydro	0.5	market_nickel_sulfate
market_share_RePyro	0.5	market_nickel_sulfate
market_share_seocondary_supply	0.2	market_nickel_sulfate
Activity	market for nickel sulfate hexahydrate
allocation	equal
code	39357cb104fb430ba65214e4641b9a71
id	2.06415e+17
location	World
type	process
Parameters	206414560257679360
name	amount	formula	code	database
dummy_parameter	1		39357cb104fb430ba65214e4641b9a71	market_nickel_sulfate
Exchanges
name	amount	database	location	unit	type	formula	original_amount
nickel sulfate	1	market_nickel_sulfate	World	kilogram	production
nickel sulfate, from primary supply	0.8	market_nickel_sulfate	World	kilogram	technosphere	1 - market_share_seocondary_supply	1
nickel sulfate, from secondary supply	0.2	market_nickel_sulfate	World	kilogram	technosphere	market_share_seocondary_supply	1
Activity	market for nickel sulfate hexahydrate, primary supply
allocation	equal
code	1eaef7671e5c433889d1594dbab7d053
id	2.05663e+17
location	World
type	process
Parameters	205662712684912640
name	amount	formula	code	database
dummy_parameter	1		1eaef7671e5c433889d1594dbab7d053	market_nickel_sulfate
Exchanges
name	amount	database	location	unit	type	formula	original_amount
nickel sulfate, from primary supply	1	market_nickel_sulfate	World	kilogram	production
final product, nickel sulfate	0.3	RKEF_OAS	OAS	kilogram	technosphere	market_share_RKEF_OAS	1
final product, nickel sulfate	0.3	HPAL_OAS	OAS	kilogram	technosphere	market_share_HPAL_OAS	1
final product, nickel sulfate	0.2	FS_CAZ	CAZ	kilogram	technosphere	market_share_FS_CAZ	1
final product, nickel sulfate	0	HPAL_CHA	CHA	kilogram	technosphere	market_share_HPAL_CHA	1
final product, nickel sulfate	0	RKEF_CHA	CHA	kilogram	technosphere	market_share_RKEF_CHA	1
Activity	market for nickel sulfate hexahydrate, secondary supply
allocation	equal
code	74bfbb2365874aa986226ee04de0e951
id	2.06414e+17
location	World
type	process
Parameters	206414331089297408
name	amount	formula	code	database
dummy_parameter	1		74bfbb2365874aa986226ee04de0e951	market_nickel_sulfate
Exchanges
name	amount	database	location	unit	type	formula	original_amount
nickel sulfate, from secondary supply	1	market_nickel_sulfate	World	kilogram	production
nickel sulfate	0.5	ReHydro_WORLD	World	kilogram	technosphere	market_share_ReHydro	1
nickel sulfate	0.5	RePyro_WORLD	World	kilogram	technosphere	market_share_RePyro	1
Activity	nickel sulfate
code	b527e55fdd714997be661154697bf367
id	2.06415e+17
location	World
processor	market_nickel_sulfate::39357cb104fb430ba65214e4641b9a71
type	product
unit	kilogram
Exchanges
Activity	nickel sulfate, from primary supply
code	49e6e91cd170430787b813e939584620
id	2.05663e+17
location	World
processor	market_nickel_sulfate::1eaef7671e5c433889d1594dbab7d053
type	product
unit	kilogram
Exchanges
Activity	nickel sulfate, from secondary supply
code	4f22d0cf02864f648b1f5386e67fbc1a
id	2.06414e+17
location	World
processor	market_nickel_sulfate::74bfbb2365874aa986226ee04de0e951
type	product
unit	kilogram
Exchanges
