# Supplementary material for: Scenario-based Inventory Modelling for Prospective Life Cycle Assessment of Mineral Raw Materials (SIMPL-Minerals)
Source: Research Square preprint supplement (doi:10.21203/rs.3.rs-8222189/v1), 2025-11-28
Supplement: Supplementary file 5 [file 9aae400514030556f0e37d2b.xlsx]

## Sheet: Title_page
International Journal of Life Cycle Assessment
Scenario-based Inventory Modelling for Prospective Life Cycle Assessment of Mineral Raw Materials (SIMPL-Minerals)
Jonas Klimt (1),*, Robert Istrate (1), Valerio Barbarossa (1), Antoine Beylot (2), Frederic Lai (2), Bernhard Steubing (1)
1 Institute of Environmental Sciences (CML), Leiden University, 2333 CC Leiden, The Netherlands
2 BRGM, F-45060 Orléans, France
* Correspondence: j.b.j.klimt@cml.leidenuniv.nl
Supplementary Information 1
Sheets	Content
SI 1.1 - Parameters	List of parameters identified, including detailed information on parameters and opinions from expert interviews.
SI 1.2 - Parameters example	Examples of parameter examples application in literature
SI 1.3 - List of interviewees	Anonymized lsit of interviees and their expertise
SI 1.4 - LCI stages & processes	This forms the basis of the invnetory model blueprint, as processes are mapped to stages within the mineral value chain
Abbreviations	Overview of used abbreviations
References	List of cited references

## Sheet: SI 1.1 - Parameters
Parameter				Depends on …				Temporal relevance			LCI connection		Description			Modelling Granularity
Supply chain stage	Parameter	Key parameter	Classification	Geography	Deposit characteristics	Technology	Connection to other parameters	Temporal relevance (for environmental assessment)	Considered in pLCA studies (Harpprecht et al., 2024)	Data availability for future projections/ assumptions	Qualitative description of connection to inventory	Foreground/ Background	Definition of parameter	Effect of change in parameter	Future change of parameter	Affected by modelling granularity	Synthesis of expert interview results
Mining, Concentration, Purification, Refining	Water source	-	Material inputs	x		x	Water circularity	Medium	No	No	Change water input (incl. associated back/foreground unit process modelling its supply)	Foreground	The source of water influences environmental impacts associated with its withdrawal. Water can be withdrawn from different water bodies/sources, with future developments including the use of desalinated seawater or treated wastewater, depending on the geography of the mine (De Lima et al., 2025). Climate change also affects water availability at mining sites which may force companies to change wa…	The source of water influences environmental impacts associated with its withdrawal. This mainly refers to energy and material requirements for preparing water to be used.	Water can be withdrawn from different water bodies/sources, with future developments including the use of desalinated seawater or treated wastewater, depending on the geography of the mine (De Lima et al., 2025). Climate change also affects water availability at mining sites which may force companies to change water management strategies (Northey et al., 2017).	-	Experts mentioned that desalination will only be adopted for sites in water scarce regions close to the sea, and if economics of building an operating desalination plants allow for it. One expert stated that projects at mine sites also look into reducing water consumption, spraying foam onto roads for dust prevention.
Mining	Water in rock mass	-	Deposit characteristics		x			Low	No	No	Adjust electricity input for water pumps	Foreground	Water in rock mass refers to the amount of water that is within or surrounding the ore body and which needs to be managed in order to extract the ore.	Mines in aquifers have to use more pumps to keep the water table below the mining depth (Dunbar, 2016).	The water table is specific to each deposit and mine site. Future changes depend on new discoveries of deposits.	-	Not part of interviews
Collection	Collection rate	x	Waste	x	x		Share of secondary production	High	No	Yes	nan (collection rate defines absolute secondary material availability; inventory connection through share of secondary supply production)	Foreground	Share of product waste generated that is collected through the formal waste management system (Poncelet et al., 2022). The parameter can be further differentiated into pre- and post-consumer collection rate.	Higher collection rates affect absolute but not relative energy consumption for the process of collection.	It is assumed that collection rates will be increased due to stricter circularity policy regulations. Losses in the use and EoL phase of products are still high (Poncelet et al., 2022) suggesting room for improvements. Furthermore policy regulations are aimed at increasing collection rates e.g., like the EU regulation 2023/1542 (European Parliament, 2023).	-	One expert commented on collection rates. Pre-consumer collections rates are already high and recycled within closed-loop systems. Post-consumer collection rates are mostly legally defined and with targets in place. Mid-term increases of these targets are unlikely. Much more important than collection rates is the put-on-market quantity (EoL waste availability), which might limit future recycling …
Mining, Concentration, Purification, Refining	Transport mode/type	-	Infrastructure	x		x	Transport infrastructure at mine site Mine-processing plant distances	Low	No	Yes	Switch and adjust energy and material inputs for transportation processes	Foreground	Modes/types of transport of ore from the mine/concentration site to the purification/refining site. This includes the modes e.g., via rail, road or water as well as types (of powertrains) e.g., electricity, renewable fuels, fossil fuels.	The modes and types of transport influence environmental impacts e.g., reducing GHG emissions but increasing other impact categories.	Mining companies claim that they want to move e.g., from diesel to electric locomotives for transportation (BHP, 2023). Future developments will also see a decarbonization in road and water vessel transport, through electrification and alternative shipping fuels (Antonini et al., 2025).	-	Not part of interviews
Mining, Concentration	Transport infrastructure at mine site	-	Infrastructure	x	x	x	Haul truck fleet mix Other machinery fleet mix Topography	Low	No	No	Adjust/change material inputs	Foreground	The transport infrastructure at site can differ e.g., roads, rails, conveyer systems, distances to concentration plants, etc.…	Depending on the infrastructure at site the energy and material demand may vary (Khakmardan et al., 2025).	It can be assumed that efforts are made to optimize transport infrastructure at site to reduce costs/energy/emissions but the implementation depends on site specific characteristics.	-	One mining company expert mentioned that distances should be considered but highly depend on the region of operation.
Mining	Topography	-	Geography/deposit characteristics	x			Transport infrastructure at mine site	Low	No	No	Topography can influence energy requirements for excavation and transport processes.	Foreground	Topography describes the surface above the deposit and ore body. This includes surface cover as well as elevation properties.	If topography complexity increases so do energy requirements for excavation and transport processes.	Dependent on new discoveries.		This parameter was identified during the experts interviews as it has major influence on energy demand for excavation and transportation processes. Trends about future changes were not identified as these highly depend on the interplay of ore body type and quantity, as well as topography. All three determine if the mining operation is economic or not.
Mining, Concentration, Purification, Refining	Electricity source/mix	x	Energy inputs	x		x		High	Yes (as part of the background)	Yes	Exchange electricity input, foreground modelling for on-site energy supply might be necessary	Foreground/Background	Electricity source is the technology type or grid mix of technologies that is used for electricity production/supply for on site usage. Electricity used at the mining and concentration site is either supplied via a connection to the regional grid, or more commonly for remote mine sites a on-site electricity generation, using renewable or non-renewable resources (Istrate et al., 2024). In the case…	Renewable energy employment reduces GHG emission but can lead to higher impacts in other impact categories due to higher material requirements of renewable energy generation and storage.	The switch of electricity sources or mix used at site is of high relevance for mining/processing companies (Antonini et al., 2025). Mines are increasingly shifting towards hybrid systems based on on-site renewable power generation combined with diesel generator or electricity from the grid i.e., shares of renewable/fossil fuels/grid at mining/beneficiation sites, while remote mining regions like …	-	The source of electricity was highlighted by the majority of experts as one of the most important parameters. Mining company experts highlight that as mining sites move to more electrification the supply of electricity becomes of high concern. Remote site have to rely on on-site generation and storage, potentially hindering electrification efforts, while other sites can be connected to the grid, …
Mining, Concentration	Tailings management	-	New technology		x	x	Ore impurities	Medium	No	No	Change unit process for tailings management	Foreground	The type of management chosen to handle tailings which includes additional processing steps applied to tailings as well as their storage. Sulfidic tailings are responsible for emissions to environment, while non-sulfidic tailings are considered inert (no emissions).	Additional steps in tailings management can reduce the direct emissions from tailings to the environment which affects human toxicity, ecotoxicity (marine and freshwater) and eutrophication impact categories, which comes at the expense of increasing other impact categories due to higher energy consumption required by the additional steps (Beylot et al., 2022).	Tailings management increasingly shifts from traditional tailings management to dewatering and dry stacking to increase safety (Furnell et al., 2022).	-	Experts mentioned two emerging management routes here. First dry stacking, which will be increasingly integrated to increase tailings dam security. Dry stacking increases energy demand for dewatering the tailings and comes with other challenges. Dry-stacking does not prevent leaching of tailings and can oxidize as they are not submerged under water. Dewatered tailings can also be used for backfil…
Mining	Strip ratio/ dilution	-	Deposit characteristics		x		Mine depth Mine type Ore body shape	Low	No	Yes	Adjust energy inputs (and potentially material inputs e.g., capital goods) in relation to the strip ratio and mine type in mining stage	Foreground	The strip ratio (or waste-to-ore ratio for open-pit mining) is defined as the mass of overburden (waste material) relative to the mass of ore extracted (Nassar et al., 2022). The term for describing waste-to-ore ratio in underground mining is dilution	A higher strip ratio/dilution equals more overburden or waste rock to remove, which increase energy/material consumption per ton of mined ore.	Trends of increasing waste rock have been observed by Mudd (2010). This can be due to ore bodies being harder to reach i.e., more overburden to remove when open-pit mining is used. A transition to more underground mining could counter this trend as underground mining has lower waste-to-ore ratios	-	Experts pointed out the connection to other parameters, like mine depth and type. With some experts expecting an increase in waste-to-re ratios.
Concentration, Purification	Electrification of equipment	x	New technology			x	Electricity source/mix	Medium	No	Yes	Change fossil fuel energy for electric energy and adjust capital good in-/outputs	Foreground	Electrification of processes refers to the switch from thermal energy generated by fuel combustion to generation via electricity. Low- and medium-temperature processes can be electrified with already existing technology (Antonini et al., 2025; Madeddu et al., 2020; Wattari et al., 2022) reducing the use of fossil fuels. Furthermore, Li et al. (2024) analyses the use of concentrated solar power (C…	Electrification reduces the need for fuels.	It is assumed that more sites move towards electrification but actual decarbonization potential especially in the concentration stage is rather small (Istrate et al., 2024).	-	Experts mentioned that this can be implemented for low thermal energy processes but implementation depends highly on on-site electricity availability.
Mining, Concentration, Pre-treatment, Purification, Refining	Energy efficiency improvement	x	Process efficiency			x	Technology switch	Medium	Yes	Yes	Adjust energy input	Foreground	Energy efficiency is the amount of energy input in relation to the amount of product output of a process. Efficiency improvements refer to small, incremental changes in sub-technologies leading to higher efficiencies without adopting a new technology.	Higher energy efficiency decreases relative energy consumption.	Energy efficiency can increase e.g., in the concentration stage as ore preparation techniques improve for grinding/milling and reduce the energy needed (Adewuyi et al., 2020). Energy efficiency at the mining level can be improved e.g., through automatization of some processes, digitalization, AI, etc. (ABB, 2025; Antonini et al., 2025; GlobalData, 2024; Istrate et al., 2024; Yang et al., 2025). I…	-	Company experts expect improvements in energy efficiency due to process integration, automatization, implementation of monitoring systems and more integration of heat exchange processes.
Concentration, Purification, Refining	Fuel source/mix	x	Energy inputs			x	Technology switch Application of CCUS	Low	Yes	Yes	Switch type of fuel input	Background	Fuel combustion for thermal heat generation. Fuels can be fossil based, synthetic fuels from renewables, or biobased, or blends of those. This relates to substitutable fuels that do not require major technological changes for combustion e.g., diesel and bio-diesel.	Fossil based carbon sources for heat can be exchanged for alternatives like hydrogen or bio-based carbon sources (Harvey et al., 2022).	It is more likely that process will be electrified if possible. Constrains like remote location of the site and low availability of renewables could lead to the adoption of alternative fuels instead of fossil fuels. Existing infrastructure is likely to be used with the alternative fuel. Alternative fuels can also be used to decarbonize the process heat (Antonini et al., 2025).	-	Experts mentioned that bio-based fuels might become an alternative to fossil-based fuels but applicability might be limited due to land use and biomass availability concerns.
Collection, Pre-treatment, Purification, Refining	Recycling rate	(x)	Process efficiency			x	Share secondary supply, Treatment efficiency, Post-/Pre-consumer collection rate	High	No	Yes	Adjust ratio of input (of waste) to output (of valuable material) for the recycling chain	Foreground	The amount of material that makes it back into productive use when the original product is no longer functional (Gaines et al., 2023). This parameter is often used in literature, which represents an aggregation of the collection rate and the recovery efficiency of pre-treatment, purification and refining steps, in our definition.	Increase in secondary supply that can come at the cost of increased material/energy demand.	Recycling rates are expected to increase over time due to regulatory pressure.	-	indirectly considered via recovery efficiencies and collection rates
Mining	Hauling fleet mix	x	New technology			x	Trucks and excavator size	Medium	No (not explicitly for haul trucks but as an overall fuel mix)	Yes	Switch energy inputs (fuel to electricity) and haul truck type in mining stage (additional LCI of novel haul truck might be needed)	Foreground	This fleet mix is the share of different technologies used for hauling the mined ore. This includes technology like in-pit crushing and conveying, but also shares of powertrain technologies used for hauling trucks like BEV, trolley assist, diesel, hydrogen or hybrids of those (Bao et al., 2023).	Novel powertrain technologies like BEV, or electric trolley-assist systems can reduce direct GHG emissions (Bao et al., 2023). Upstream emissions from e.g., electric batteries in trucks need to be considered therefore a simple fuel mix approach is not feasible. Energy demand in underground mines is reduced due to reduced need for ventilation.	Mining companies outline in sustainability reports that they intend to shift their haul truck fleets from diesel to electric trucks or hydrogen powered trucks (BHP, 2023; Gleeson, 2018). This will not be a complete shift but in the future the fleets will be a mix of diesel and electric trucks (and maybe other fuels based on hydrogen or biomass) (Antonini et al., 2025; Istrate et al., 2024).	-	Experts expect a strong push for electrification (especially in underground mines) of hauling trucks in the coming years. Although there is a clear push for electrification the technologies used are not clear yet. Most mining company experts expect a mix of technologies like hybrid, trolley assist, battery and green fuels vehicles, as heavy duty batteries required for hauling trucks are currently…
Purification, Refining	Product purity	-	Product quality		x	x	Concentrate grade Recovery efficiency improvement	Medium	No	No	Adjust the content of valuable material in intermediate/final product Adjust respective inputs that need to increase to realize change in purity	Foreground	Product purity refers to the concentration of valuable material within the intermediate or final product.	Higher purity levels might require higher energy/material inputs.	As product purities are directly related to the application of the product, they are not expected to change much.	-	Not part of interviews
Mining, Concentration, Purification, Refining	Heat source/mix	x	Energy inputs	x		x	Electrification of equipment Fuel mix Application of CCUS	Medium	No	Yes	Exchange heat input	Foreground/Background	Heat source is the technology type or grid mix of technologies that is used for heat production/supply for on site usage. This can be a fuel for combustion (e.g., coal vs LNG in rotary kilns), electricity conversion into thermal energy (electrification of low heat processes), connection to a heat supply grid or alternative thermal energy source like concentrated solar power or geothermal energy. …	Renewable energy employment and fuel substitution reduces (direct) GHG emissions but can lead to higher indirect emissions and shifts to other impact categories.	It is expected that renewable heat sources will be increasingly adopted.	-	Experts mentioned bio-based alternatives like biomethane (which is technically feasible but economically unfeasible) could become viable alternatives in the future. Alternatively hydrogen can be used as a heat source but market penetration depends highly on future hydrogen grid availability. While electrification can be an option for low thermal processes.
Mining, Concentration, Pre-treatment, Purification, Refining	Material efficiency improvement	x	Process efficiency			x	Technology switch Recovery efficiency improvement	Medium	No	Yes	Adjust material inputs	Foreground	Material efficiency is the amount of material input in relation to the amount of product output of a process. Efficiency improvements refer to small, incremental changes in sub-technologies leading to higher efficiencies without adopting a new technology. In the beneficiation stage this mainly influences the use of frothers and collectors in the floatation process.	Higher material efficiency decreases relative material consumption.	Material efficiencies can be assumed to increase over time but there is no to limited evidence in literature for this trend. Some studies suggest improvements as e.g., Yunita and Mubarok (2021) that showed that a combination of sulfuric acid and citric acid can decrease material consumption. Furthermore, the efficiency of the flotation process is likely to increase over time (Sahbaz et al., 2024).	-	Two experts from mining/processing companies mentioned that material efficiency is likely to increase due to optimization of, e.g., flotation plants. They also highlight that this requires new technology investment.
Mining, Concentration	Ore grade/Cut-off grade	x	Deposit characteristics		x		Ore impurities Concentrate grade	High	Yes	Yes	Adjust all energy and material inputs for concentration stage in relation to ore grade	Foreground	Ore grade is the concentration of economic mineral or metal in an ore deposit (Dunbar, 2016). What is more important for the environmental performance of a mine is the cut-off grade i.e., the ore grade of the extracted ore that is being processes due to economic reasons.	Ore grade majorly influences energy and material requirements in the concentration stage as more ore needs to be concentrated to reach the desired amount of concentrate. A declining ore grad results in higher energy and material requirements (van der Voet et al., 2019; Harpprecht et al., 2021)). Ore grades only influence the energy consumption of mining and concentration stage as constant concent…	For some minerals decreasing ore grades have been observed over time (van der Voet et al., 2019). But it should be considered that future ore grade predictions are complex as multiple factors (e.g., economics, regulations, deposit characteristics, …) (Northey et al., 2018).	Cut-off grade within a mine declines (or increases if high grade ore was not mined yet due to economic reasons), but general ore grade decline trends exist only when considering multiple mines.	All experts agreed on the importance of ore grade as parameter as declining ore grade trends are expected to continue into the future. One expert also highlighted that this is of relevance for host commodities but not for by-co-product commodities. Furthermore, most experts emphasized that ore grade development depends on new discoveries.
Mining	Other machinery fleet mix	x	New technology			x	Trucks and excavator size	Low	No (not explicitly for haul trucks but as an overall fuel mix)	Yes	Switch energy inputs (fuel to electricity) and machinery types in mining stage (might require additional LCIs for novel technologies)	Foreground	Loaders, drillers and other machinery and mining equipment and their powertrain types represent the other machinery fleet mix.	Electrification of mining equipment can reduce GHG emissions (ABB, 2024). Upstream emissions from e.g., battery production need to be considered.	Mining companies outline in sustainability reports that they intend to electrify mining machinery and equipment (BHP, 2023; Gleeson, 2018).	-	Will likely follow trends of general mine electrification trends.
Mining, Concentration	Ore density/refractory	-	Deposit characteristics		x		Grinding size	Low	No	No	Adjust energy required for grinding/milling processes, adjust explosive input for mining processes	Foreground	Ore density or hardness refers to the property of the ore that determines how easy/hard it is to break apart and separate large ore objects into smaller ones as well as liberating minerals containing valuable materials.	The ore density influences energy consumption in the grinding and milling processes (Eckelman, 2009) as well as the explosive requirements and quantity (Khakmardan et al., 2025). Usually higher density comes with higher energy requirements (Lastra et al., 2021).	For the case of Australia it has been observed that more refractory types of ores have been developed over the last decades (Mudd, 2010).	-	Some experts highlighted the importance of the refractory properties of the ore, as this determines the energy needed to liberate the valuable material from the ore. Experts did not see any clear trends in in-/decreasing ore refractory properties.
Mining	Ore body shape	-	Deposit characteristics		x		Strip ratio/dilution Mine type	Low	No	No	Adjust energy inputs and waste output in mining stage.	Foreground	Ore body shape is the form that the ore body takes underground, and if it follows a horizontal or vertical alignment. This influences how much waste rock has to be removed to reach the ore body and what kind of mine type is used.	If ore body shapes become increasingly complex (i.e., harder to reach) more energy is consumed and waste generated to reach the ore body.	Ore body shapes might become increasingly complex as easier to mine shapes are mined first. This does not necessarily have to be true due to mine economics (Northey et al., 2018). Furthermore, this development highly depends on new deposit discoveries that are highly uncertain.	-	While experts from mining companies think a trend in increase of ore body shape complexity is possible, experts from academia emphasized that this is highly uncertain and depends on new deposit discoveries.
Concentration	Mineralogy	-	Deposit characteristics		x		Ore grade	Medium	No	No	Adjust energy/material input , potentially add new material input that is needed to extract impurities	Foreground	The type of deposit mineralogy, e.g., sulfide vs laterite ores but also the impurities that are waste materials/dilutions that are part of the ore mineral but don't have economic value. Their quantity depends on the ore grade (lower ore grade leads to higher impurities/dilution levels) but also the type of impurities play a role.	Impurities like heavy metals or radioactive substances pose a threat in mining waste and have to be addressed (Günter et al., 2020). The quantify and type of impurities directly affect the amount of energy, material and technology requirements in concentration and purification (Weng et al., 2016; Schenker et al., 2022).	It is assumed that impurity levels will increase over time as purer ores are economically more viable and extracted first (depending on the market situation) (Northey et al., 2018). No data is available to quantify a potential increase.	-	The deposit specific mineralogy determines environmental impacts relating to waste (e.g., leaking of substances, tailings management, recoverability). This can be relevant for sulfur, uranium, arsenic containing deposits. There is the possibility of a trend towards more difficult mineralogy deposits being mined, as purer ores are being mined earlier, but it should be considered that this also str…
Mining	Mine type	-	Deposit characteristics		x		Mine depth Strip ratio	Low	No	Yes	Switch and adjust energy and material inputs depending on type	Foreground	There are two major mine types: 1) open-pit (also called surface mining) where the ore body is extracted via excavating a large pit, and 2) underground where shafts and tunnels are used to reach and extract the ore body. A single mine site can also use a combination of both. Other mine types can also be deep sea mining where nodules are collected and pumped to the surface. Pytho mining or tailing…	Mine type (open-pit/underground) influences the energy requirement to extract the ore. Underground mining requires more energy than surface mining due to greater requirements for hauling, ventilation, water pumping and other operations, while energy sources i.e., electricity and fossil fuel liquids differ as well (Norgate et al., 2013; Schneider et al., 2013; Eckelmann, 2010).	The mine type depends on the ore body depth and shape, therefore depending on future deposit discoveries. Some deposit types in specific regions are predominantly mined by either underground or surface mining. Changes depend on market shares of these deposits. Novel mining types like deep sea mining are highly depend on future policy-landscapes (country positions), geopolitical landscape, and civ…	-	Experts agreed that the type of mine primarily depends on the ore body shape and depth. Nevertheless, through societal pressure a shift towards underground mining could be forced, as those. This is hindered by the higher economic cost of underground mining compared to open-cut. Tailings reprocessing are expected to have little contribution to global supply but experts pointed out that projects as…
Mining	Mine depth	-	Deposit characteristics		x		Strip ratio Mine type	Low	No	No	Adjust energy input associated with transportation of the ore out of the mine	Foreground	Mine depth is the average depth at which the ore is extracted.	Mine depth influences the energy requirement to extract the ore (Koppelaar and Koppelaar, 2016).	The mine depth for a single site are increasing over time (Mudd, 2010), but general trends in mine depth are dependent on the depth of the ore body. Depth of ore bodies might be increasing as increasing strip ratios could suggest (Mudd, 2010).	-	Experts agreed that mine depths are likely to increase in the future as deposits near the surface are mined first, and due to technology allowing for deeper extraction operations while staying economically viable. Multiple experts also mentioned that this is highly dependent on new discoveries, as major deposits near the surface can still be found. One expert mentioned that the mining depth is de…
Mining, Concentration, Purification, Refining	Mine - processing plant distances	-	Infrastructure	x			Transport type/mode	Low	No	No	Adjust transport distance (tkm) input	Foreground	The distance and infrastructure between the mine and the processing plant (purification and refining).	Shorter distances reduce environmental impacts.	It can be assumed that distances are further optimized in the future to reduce costs but distances are dependent on the geography of the mineral extraction and later processing sites, as well as the different technological and economic circumstances of the respective region(s).	-	Not part of interviews
Market	Primary production pathway share	x	Market shares	x	x	x	Primary production share	High	Yes	Yes	Adjust inputs to market process	Foreground	Primary production can occur through different production types. These can be represented at different levels of aggregation: site-, technology-, deposit-, ore grade-, geography-specific or a combination of those (e.g., Ambrose and Kendall, 2020), which can also include unconventional/novel production pathways like ASM (Langkau and Erdman, 2021) or tailings reprocessing (Roy et al., 2025). Furthe…	Different primary production routes can have different environmental impacts due to different deposit and ore characteristics that require different processing technologies (Harpprecht et al., 2024).	Market shares of primary production routes can change over time as some deposit types in specific regions have lower potential for increasing production as others (IEA, 2024), or are more economic due to lower extraction costs (Ambrose and Kendall, 2020).	Yes, depending on the granularity of the supply chain representation different market process are necessary	Not part of interviews
Market	Primary production share	x	Market shares	x	x	x	Secondary production share	High	Yes	Yes	Adjust inputs to market process	Foreground	The primary production includes all production that starts with the extraction of the mineral from geological feedstock types. This includes deposits but also tailings that are being reprocessed. The shares can be analyzed and projected at different geographical scales e.g., local, national, regional or global. Depending on the scope of the analysis one may consider separate secondary and primary…	Primary production in most cases is associated with higher environmental impacts than secondary production (Harpprecht et al., 2024).	The share of primary production will change as primary and secondary production will try to satisfy demand (Harpprecht et al., 2024).	Single sites might not have primary feed e.g., recycling facilities	Not part of interviews
Mining, Concentration, Pre-treatment, Purification, Refining	Recovery efficiency improvement	x	Process efficiency		x	x	Ore grade Ore impurities Technology switch Material efficiency Energy efficiency	Medium	Yes	Yes	Adjust process output	Foreground	Recovery efficiency is the amount of valuable material entering the process in relation to the amount of valuable material leaving the process. Efficiency improvements refer to small, incremental changes in sub-technologies leading to higher efficiencies without adopting a new technology. Recovery efficiency is not only dependent on the technology used but also on the ore grade (Nassar et al., 20…	Higher recovery efficiency increases relative valuable material yield.	Potential for improvement exists in the concentration stage (Istrate et al., 2024). The recovery efficiency for the refining stage is already quite high in many processes (>90%) (Nassar et al., 2022; Istrate et al., 2024). Future improvements will be small. Recovery efficiency for some purification stages like leaching is still low (below 60%), suggesting potential for improvement (Metso, 2011). …	-	Experts agreed that recovery efficiencies can increase over time, although the overall potential might be rather small. Improvement opportunities are highly case specific. Recovery efficiency increases are also expected with some transition from pyro- to hydrometallurgical processing, as hydrometallurgy allows for a more selective recovery of valuable materials. Furthermore, the integration of pr…
Concentration	Grinding size	-	Product quality		x		Ore density/refractory	Low	No	Yes	Adjust electricity input amount in grinding/milling processes in relation to grinding size	Foreground	Grinding size is size of ore particles needed for further processing after the grinding and milling processes.	Finer grinding sizes increase energy consumption for grinding/milling (Norgate & Jahanshahi, 2011).	Assuming increasing ore complexity in future extractions due to the priorization of the extraction of low-complexity ores in earlier years, the energy (electrical) consumption for concentration (mainly crushing/grinding/milling) will increase, due to finer grind/liberation sizes necessary to extracted the valuable material (Norgate & Jahanshahi, 2011).	-	Not part of interviews
Purification	Reductants substitution	x	Material inputs			x		High	Yes (as part of fuel mix)	Yes	Switch and adjust reductant input in purification stage, might require additional LCIs to model substitution	Foreground	Pyrometallurgical processes that reduce the ore, rely on reductants, often in the form of coal or charcoal. Alternatives like bio-based or hydrogen reductants exist.	Alternative reducing agents such as natural gas or hydrogen can reduce these direct emissions, and bio-based reductants sequester later emitted carbon during their production (IEA, 2020).	More sustainable reductants gained traction in recent years, with hydrogen and bio-based reductants being considered a viable alternative, although facing some challenges (Istrate et al., 2024).	-	Most experts mentioned that reductant substitution is of high concern for them and alternatives like hydrogen- or bio-based alternatives will become important in the future to reduce direct emissions. But experts also pointed out that currently multiple barriers to the adoption of these alternatives exist. While Hydrogen alternatives need massive up front investments and investment in infrastruct…
Market	Secondary production pathway share	x	Market shares	x	x	x	Secondary production share	High	Yes	Yes	Adjust inputs to market process	Foreground	Secondary production can occur through different production types. These can be represented at different levels of aggregation: feedstock-, technology-, geography-specific or a combination of both.	Different secondary production routes can have different environmental impacts due to different technologies used, different feedstocks (i.e. wastes) processed and different regional energy mixes.	Market shares of secondary production routes can change over time as some production routes might be economically favorable or less environmentally harming.	Yes, depending on the granularity of the supply chain representation different market process are necessary	Not part of interviews
Market	Secondary production share	x	Market shares	x	x	x	Primary production share	High	Yes	Yes	Adjust inputs to market process	Foreground	The secondary production includes all production from secondary material sources i.e., material that extracted in a previous life cycle. The share of secondary production will change as primary and secondary production will try to satisfy demand. The shares can be analyzed and projected at different geographical scales e.g., local, national, regional or global. Depending on the scope of the analy…	Secondary production in most cases is associated with lower environmental impacts than primary production (Harpprecht et al., 2024).	The share of secondary production will change as primary and secondary production will try to satisfy demand. The share of secondary production can increase as more material becomes available for recycling. (Harpprecht et al., 2021)	Single sites might not have secondary feed	Not part of interviews
Mining, Concentration, Pre-treatment, Purification, Refining	Technology switch	x	New technology			x	Energy/material/recovery efficiency improvement	High	Yes	Yes	Addition of new LCIs and adaption of in/outputs	Foreground	A technology switch describes the switch from an older technology/process to a new technology/process. This change is not part of the efficiency improvement parameters as it affects the inventory to a larger extend, not only making existing inputs more efficient but changing them significantly. Such new technologies/processes could be bioflotation, bioleaching, high pressure grinding rolls, in-si…	Adoption of new technology likely focusses on reducing the most harmful environmental impacts of current practices. But impact changes can be diverse and depend on the respective new technology employed.	It is expected that new technologies will be implemented in the future (Istrate et al., 2024). This depends on their economic viability or environmental regulations require the adoption of new technology.	-	Experts mentioned the following technology switches that they expect to see over the next years and decades: sensor technologies (e.g., for ore sorting), reduction in carbon and nitrate explosives in blasting, replacement of blasting with mechanical processes, in-pit crushing, in-situ leaching, directional drilling, bioleaching as an additional process step or for very low ore grades, high pressu…
Concentration	Concentrate grade	-	Product quality		x	x	Ore impurities Ore grade Recovery efficiency	Low	No	No	Adjust the content of valuable material in concentrate Adjust respective inputs that need to increase to realize change in concentration	Foreground	The concentrate grade (% metal content in the concentrate) can vary depending on the ore grade and impurities, technology, etc. For example, graphite concentrate grade can vary between 85% and 98% carbon content (Engels et al., 2022). The concentrate grade is indirectly considered in the recovery efficiency of the beneficiation stage.	The concentrate determines the energy and material inputs in the proceeding purification processes.	The concentrate grade may be increased with technology shifts but may also decrease with changes in the ore grade and the impurities.	-	Not part of interviews
Mining, Concentration, Purification	Water circularity	x	Material inputs			x	Water source	Medium	No	No	Decrease water inputs to processes	Foreground	Amount of water that can be recirculated within the process without adding additional freshwater from external sources.	Reduces freshwater water consumption, but can increase other material or energy consumption for prepare the wastewater for re-use.	Might increase, but highly dependent on are of the plants and their respective water scarcity. Propositions and solutions for increasing water circularity exist, e.g., through tailings dewatering (Hamraoui et al.2024) or re-use in flotation circuits (Lin et al., 2020).	-	All experts from mining and processing companies mentioned that closed-loop improving water recycling is of high concern for the company and that improvement opportunities exists. Multiple experts mentioned that the improvement of water circularity is highly dependent regional water scarcity.
Concentration, Purification, Refining	Co-/by-products	-	Deposit characteristics		x			Medium	No	No	Multifunctionality needs to be addressed	Foreground	Co-/by-products according to the ISO 14044 are defined as two products coming from the same unit process or production system. Co-products are defined here as products which are intentionally produced, with significant economic value. By-products are defined here as products which are not intentionally produced and are of lower economic value.	The type and amount of valuable and economically recoverable elements in the ore determine what kind of technologies and reagents are used. E.g., an ore containing not only one but two valuable materials would go through more extraction steps and different reagents are used in order to extract both materials until they can be separated and further purified and refined (Dunbar, 2016).	Concentration of co/by-products associated with base metals can change (i.e., changing compositions of minerals).	-	Ratios of co-/by-products are expected to change in the future but are highly dependent on new deposit discoveries. Experts did not mention any trends. Experts expect co-by-product valorization and recovery to increase.
Concentration, Purification, Refining	Climate conditions	-	Other	x			Water source Water circularity	-	No	Yes	Adjust thermal or electric energy input	Foreground	Air temperature determines the need for cooling processes (e.g., dissolution of Li2CO3) (Schenker et al., 2022). Mining operations can be affected by climate change (Savige et al., 2025).	Increased cooling requirements increase energy consumption. Climate change can lead to water scarcity requiring more energy to access water sources or increase water circularity.	Air temperature can be predicted in accordance with climate change scenarios. Only slight future changes in air temperature make it likely that this does not influence changes in the need for cooling processes. Water scarcity can be predicted using climate change scenarios.	-	Experts mentioned that water scarcity due to climate change may become a pressing issue for operations in water scarce regions.
Concentration, Purification	Chemical reagent substitution	-	Material inputs		x	x	Material efficiency improvement	Low	No	Yes	Exchange reagent type and adjust input amount	Foreground	Reagents substitution refers to alternatives to be used as reagents with less environmental harming impacts (Istrate et al., 2024). Reagents in the concentration stage refer to reagents used in the leaching and flotation process which include frothers, collectors or depressants. Reagents in the purification stage refer to those used in hydrometallurgical processes e.g., leaching reagents. This pa…	Reagents can be substituted through alternatives reducing upstream emissions or direct energy/material requirements (Istrate et al., 2024).	Substitution potential is limited as not many substitutes could be identified from literature. If a substitute provides economic and environmental benefits it is assumed to be adopted under the premise that it can fulfill the same function as the substituted reagent. But nevertheless toxic and environmentally harming reagents will be substituted through better alternatives, as research on such su…	-	Although there is some projects looking at alternative reagents most of them are at a low TRL. Experts agreed that substitution of reagents is unlikely for retrofitting existing plants as operations are optimized and build around the specific reagent. New plants could potentially integrate new reagents but mining company experts mentioned that they also rely on the chemical industry to decarboniz…
Concentration, Purification, Refining	Chemical reagent decarbonization	x	Material inputs			x		High	No	Yes	Adjustment of background processes producing chemical reagents, indirect via decarbonization of energy supply or direct via changing LCIs producing the reagent	Background	The production of chemicals consumed for e.g., flotation, leaching, and other hydrometallurgical processes can be decarbonized.	This will reduce GWP impacts associated with the chemical production.	The chemical industry will implement renewable electricity sources, electrification of heating and renewable carbon feedstocks (Istrate et al., 2024).	-	This will partially occur through decarbonization of the energy grid and partially through avoidance of direct emissions. Reduction potential is highly case specific.
Concentration, Purification, Refining	Chemical reagent circularity	-							No	No	Adjust material inputs and energy inputs needed to reprocess and recirculate the reagent	Foreground	Amount of chemical reagent that can be recirculated within the process, describing describes a closed-loop recycling system (Istrate et al., 2024).	Lower consumption of reagent, with potential increase in other material and energy consumption used for recirculating reagent.	Technical solutions exists but their uptake by real-world projects may be limited due to economic and technologic/ore specific challenges. For flotation novel approaches exist like polymer-based collectors that can be recycled (Bednarek et al., 2025), as well as studies showing increased circularity of acid solutions (Moreira et al., 2022; Zhang et al. 2020).	-	Although some experts argued that there is room for improving reagent re-use (which is not true for every process as, e.g., solvent extraction process circularity is already quite high), the expected future improvements are rather small. This is due to processes being already optimized at the start of the project and that circularity can not be increased, e.g., due to economic or technologic reas…
Purification, Refining	Application of CCUS	-	New technology			x	Heat source Reductant substitution	Medium	Yes	Yes	Adjust CO2 outflow and add CCUS process as input to purification and refining stage	Foreground/Background	CCS can be applied to capture direct CO2 emissions from processes. These emissions occur during (pyrometallurgical) oxidation processes burning of carbon, or during reduction processes using a carbon source to reduce the ore (Harpprecht et al., 2024). Furthermore carbon can also be captured through carbon dioxide removal processes like enhanced rock weathering (Istrate et al., 2024).	CO2 emissions can be reduced at the expense of operating a CCUS system.	CCUS can be adopted for hard to abate emissions from pyrometallurgical processes, although the implementation shows limited applicability in the mineral supply chain (Antonini et al., 2025; Istrate et al., 2024). Adoption rates can vary depending on the scenario storyline (Sacchi et al., 2022).	-	Experts agreed that a technology implementation of CCUS is unlikely due to technical barriers like impure off-gases, economic barriers like operating cost, and logistic barriers like the lack of options and infrastructure of storing or using the captured carbon. Some experts mentioned that natural solutions, mainly mentioning CO2 sequestration through enhanced weathering in mine and tailing sites…

## Sheet: PESTEL_CLD
Factor category	Specific factor	Impact description	Importance	Feedback to other specific factors (+ reinforcing, - balancing)
Economic	Commodity price	Changes in prices influence the profitability and attractiveness of resource extraction	High	RM demand (-), RM supply (+), Consumer behaviour (+), Substitutability (+), Product material efficiency (+)
Economic	Extraction cost	Variations in costs affect the financial viability of mining operations	High	Commodity price (+), Recycling & circular economy innovations (+), Recycling share (+)
Economic	RM demand	Fluctuations in demand affect market stability	High	Commodity price (+), Mining impacts (+), Substitutability (-)
Economic	RM supply	Changes in supply availability impact market dynamics and operational decisions	High	Commodity price (-), Mining impacts (+)
Economic	Recycling share	Higher shares from secondary sources reduce reliance on primary raw materials	High	Mining impacts (-),
Economic	Recycling cost	Economic feasibility of recycling depends on associated costs	High	Commodity price (+), Recycling & circular economy innovations (-), Recycling share (-)
Economic	Currency exchange rates	Affects the cost of imports and exports for raw materials	Medium	Commodity price (+), Trade policies & tariffs (+)
Economic	Supply chain disruptions	Interruptions in logistics affect material availability and operational continuity	High	RM supply (-)
Environmental	Climate change	Climate change influences how society deals with extraction processes	High	Climate change awareness (+), Climate policy (+)
Environmental	Mining impacts	Environmental impacts of mining projects determine the sustainablility of the raw material	Medium	Climate change (+), Acceptance of mining (-)
Legal	Mining legeslation	Sets legal frameworks for safety, environmental management, and operational practices	Medium	Mining impacts (-), Extraction cost (+)
Legal	Climat change mitigation legeslation	Imposes legal obligations to reduce emissions and adopt cleaner technologies	High	RM demand (+), R&D policy (+)
Political	Climate policy	Shapes national and international approaches to climate change mitigation and expansion of renewable energy	High	Climate change mitigation legislation (+), RM demand (+), Consumer behaviour (+)
Political	R&D policy	Influences innovation and technological advancement in mining and recycling	Medium	Recycling cost (-), Ectraction cost (-), Substitutability (+), Recycling & circular economy innovations (+), Mining & extraction technologies (+)
Political	Mining policy	Governs resource access, permitting, and environmental obligations	High	Mining impacts (-), Extraction cost (+), Mining legislation (+)
Political	Recycling policy	Encourages circular economy and reduces reliance on primary raw materials	High	Recycling cost (-), Recycling share (+)
Political	Trade policies & tariffs	Import/export restrictions affect supply chains	High	Currency exchange rates (+), RM supply (-)
Political	Geopolitical conflicts	Political instability can restrict access to critical regions and resources	Medium	Supply chain disruptions (+)
Social	Climate change awareness	Public awareness influences perceptions and support for mining activities	Low	Acceptance of mining (-), Consumer behaviour (+)
Social	Acceptance of mining	Societal attitudes affect the expansion of mining operations	Medium	Mining policy (+)
Social	Mining impacts	Social impacts of mining projects affecting marginal groups in the mining area and workers	Low	Acceptance of mining (-)
Social	Consumer behaviour	Consumer choices influence demand patterns for raw materials and products	High	RM demand (-)
Technological	Substitutability	Availability of alternatives reduces reliance on specific materials	High	RM demand (-)
Technological	Recycling & circular economy innovations	Enhances resource efficiency and reduces extraction pressure	High	Recycling cost (-), Climate change mitigation legislation (+)
Technological	Mining & extraction technologies	Advances improve performance, reduce costs, and minimize environmental impacts	High	Extraction costs (-)
Technological	Product material efficiency	Material optimization reduces raw material needs and waste	Medium	RM demand (-)

## Sheet: SI 1.2 - Parameter examples
Stage	Parameter	Raw Material	Data availability	Model availability	Prospective	Geographical coverage	Technological coverage	Description	Connection with inventory	Source
Purification, Refining	Application of CCUS	Fe	TRLs, industry information, costs	bottom-up energy systems model taking into account costs	x	Global	CCUS	The model aligns the application of CCUS with broader climate change scenarios, based on current TRLs and costs	Addition of CCU LCI and reduction of emission output of respective process	IEA (2020)
Purification, Refining	Application of CCUS	Fe	IAM specific assumptions	IAMs: bottom-up energy systems model taking into account costs	x	Global	CCUS	IAM models calcualte the necessary share of CCUS to comply with emission reduction targets.	Addition of CCU LCI and reduction of emission output of respective process	Sacchi et al. (2022)
Market	Demand	Li	Historic market data, projected market data	Estimations	x	Global	Lithium ion batteries	Based on 1) planned and commissioned LIB manufacturing capacity 2) improving LIB energy densities and 3) market shares of LIB cathode types.	Demand is the quantified functional unit	Ambrose and Kendall (2020)
Market	Demand	Ag, As, B, C, Cd, Co, Cr, Cu, Dy, Ga, Ge, In, Li, Mn, Mo, Nd, Ni, Pb, Pt, Se, Si, Sn, Ta, Te, Ti, V, Zn	Energy demand scenarios, energy supply scenarios, technolgies and subtechnolgies assumptions, material intensities, dynamic variables (recycling rates, technolgical efficiency improvements, policy changes, economic trends)	SD, dMFA, regression analysis	x	Global, regional, national	Renewable energy technologies	Review study of RM demand projections. These usually work as follows: (1) Future Renewable Energy Deployment; (2) Current and Future Renewable Sub-Technologies; (3) Material Intensities of Sub-Technologies; and (4) Dynamic Model Variables	nan	Calderon et al. (2024)
Market	Demand	Co, Cu, Li, Nd, Ta	pkm projections, no. of appliances projections, power generation capacity, lifetime, material intensities	dMFA	x	Global	Houshold appliances, cars, electricity generation	Outputs of IMAGE (pkm, no. of appliances) is used as an input to a dMFA model using lifetimes. Then combined with IMAGE output (electricity generation capacity) to estimate total technology demand. Multiplied with material intesnties.	nan	Deetman et al. (2018)
Market	Demand	Al, Cd, Cr, Cu, Fe, Mg, Mn, Mo, Ni, Pb, Zn	Energy demand scenarios, energy supply scenarios, technolgies and subtechnolgies assumptions, material intensities, lifetime	dMFA	x	Global	Electrcity sector	Stock and flow model based on final energy demand, using lifetime to derive demand for technoliges multiplied with material intensities	Demand is the quantified functional unit	Elshaki et al. (2013)
Market	Demand	Cu	Historic demand, Historic and projected level of urbanization, Historic and projected per capita GDP	Regression analysis	x	Global	Built-in appliances, consumer EEE, instrustrial EEE, infrastructure, motor vehicles, wiring, plumbing, on-site waste, other transport	Regression analysis based on per capita GDP, urbanization levels, population. Projections of per captia GDP, poulation and urbanization levels based on UNEP's GEO-4 scenarios.	Demand is the quantified functional unit	Elshaki et al. (2016)
Market	Demand	Ni	Historic demand per sector, GDP/capita, urbanization levels, population	Regression analysis	x	Global	nan	Regression analysis of Ni demand based on per capita GDP, urbanization levels, population. Projections of per captia GDP, poulation and urbanization levels based on UNEP's GEO-4 scenarios.	Demand is the quantified functional unit	Elshaki et al. (2017)
Market	Demand	Al, Co, Fe, Mn, Ni, Pb, Zn	Historic demand, Historic fractions of metal uses, population projections, GDP/cap projections, RMC estimates	Regression analysis	x	Global	nan	1) Identification of uses of metals and the historic fractions. 2) Demand is disaggregated based on use in different final product sectors, including buildings and infrastructure, transportation, industrial machinery, appliances, electronics, metal goods, and chemicals. 3) Future metal demand based on GDP/capita combined with population projections. 4) Ajustments of grwoth raters for housing & in…	Demand is the quantified functional unit	Elshaki et al. (2018)
Market	Demand	Cu, Li	Use category historic growth	Assumptions based on data sources, own estimates	x	Global	nan	Projections taken from two Frauenhofer studies on Li and Cu. Projections based on hsitroic trends in specific use categories. These are estimated into the future.	Demand is the quantified functional unit	Langkau and Espinoza (2018)
Market	Demand	Al	Population projections, GDP/capita projections	SD	x	China	nan	SD model determines final demand through population and GDP/capita projections and aluminium consumption per capita	Demand is the quantified functional unit	Li et al. (2017)
Market	Demand	Al	Histroric data on GDP/cap, urbanization rate	Regression analysis	x	China	nan	Regressions analysis on the aluminim consumption over time explained by GDP/cap and urbanization levels	Demand is the quantified functional unit	Li et al. (2021)
Market	Demand	Ga, Ge, In, Co, Cu, Li, Pd, Pt, Re, Sc, REE, Ag, Ta, Ti, Sn	Current market shares, current material intensities, industry data, regulations, expert opinions	Assumptions based on data sources	x	Global	42 selected technolgies with future importance from the sectors "vehicle construction, aerospace, traffic technology", "information and communication technology, optic technology, microtechnology", "energy, eletric and propulsion technology", "chemical, process, manufacturing technology and mechanical engineering", "medicin", "materials engineering"	For the selected product categories, future projections of material demand are estimated. Starting point are the current demand numbers, material intensities and recycling quotas. Those are then projected to 2040 to using industry data/company reports/roadmaps, (announced) regulations, and expert opinions, depending on the product category.	Demand is the quantified functional unit	Marscheider-Weidemann et al. (2021)
Market	Demand	Cu	Historical demand, population projections	Regression analysis	x	Global	nan	Demand per capita is projected to grow exponentially at historic rates. This is multiplied with population projections.	Demand is the quantified functional unit	Northey et al. (2014)
Market	Demand	Co, Ga, In, Mg, Ni, Pa, Rh, Ph, Nd, Dy, Ta, Tu	Current demand per use category	Estimations based on data availability	x	Global	most important use applications for each RM	The report estimates developments of RM demand based on estimations of the use category demand	nan	SCREEN project (2016)
Mining, Concentration	Electricity source	nan	TRL	Business plan	x	Australia	Wind, Solar, Storage, Gas	BHP wants to fulfill increasing enery demand (because of electrifcation of operations) with the installation of wind, solar, storage (+ using already existing gas plant) by 2030	nan	BHP (2023)
Purification, Refining	Electricity source	nan	IAM specific assumptions	IAMs: bottom-up energy systems model taking into account costs	x	Global	all energy sources	Through the integration of IAM scenarios with LCI databases, the prospective electricity mix per IAM region can be determined.	Changes in background electrcity datasets and markets. Electricity market used as input of electricity flow to foreground.	Sacchi et al. (2022)
Purification	Electrification of equipment	Cu	Current available technology	Assumptions based on data sources	x	Global	Low-/medium-temperature processes	Based on current available technologies the study assumes a emission reduction combining electrification with a decarbonisation of the electricity supply.		Watari et al. (2022)
Mining, Concentration, Purification, Refining	Energy efficiency	Cu	Historical energy efficiency data	Regression analysis	x	China	Pyro/-hydrometallurgical	Pyro: regression analysis on historical data for mining/beneficiation, smelting/converting, and refining seperatly. Hydro: assumption of fixed yearly increase based on literature.	nan	Dong et al. (2020)
Mining, Concentration, Purification, Refining	Energy efficiency	Fe	NEEDS project	Assumptions based on data sources	x	nan	Sinter/pig iron process	Possible reductions in energy consumption and emissions from Fe production taken from NEEDS project	Enrgy efficiency adjsutment multiplied with energy flows in material supply processes	Koroma et al. (2020)
Mining, Concentration, Purification, Refining	Energy efficiency	Cu	Global average energy requirements, best practice energy requirements, theoretical minimum energy requirements,	U.S. DOE mining industry energy bandwidth	x	Global	nan	Deriving energy efficiency improvments using a best practiice and theoretical minimum energy efficiency		Kuipers et al. (2018)
Purification, Refining	Energy efficiency	Cu	NEEDS project	Assumptions based on data sources	x		Shaft furnace, Outokumpu flash furnace	Possible reductions in energy consumption and emissions from Cu production taken from NEEDS project		Kulczycka et al. (2016)
Mining	Energy efficiency	Au, Fe	Case study	Assumptions based on data sources	x	Canada	Haul trucks, excavators, ventilation on demand systems	Estimations based on a case studies 1) assume a 3.6% saving in fuel use haul trucks when eliminating one stop (empty haul truck) per payload cycle. 2) 8% fuel saving with improved thermal energy management sytem for haul trucks. 3) Shovel operation efficiency improvment resulting in 10.2% energy reduction. 4) Itroduction of VOD systems can result in energy reductions of 30% for ventialtion.		Kumar et al. (2020)
Mining, Concentration, Purification, Refining	Energy efficiency	Al	Historic data	Regression analysis	x	China	nan	Historic trend is projected to continue into the future		Li et al. (2017)
Purification, Refining	Energy efficiency	Al	Exisiting plants, BAT	Return on investment model at plant level	x	European Union	nan	The model takes information on current processing sites in the EU and checks per plant if BAT or innovative technoliges (ITs) can be installed (from technoligcal standpoint). Then economic viability of such installation is checked via payback periods <5 years based on initial investment and return on investment from savings in energy use, co2 emissions and potential operation costs (reduced labou…		Moya et al. (2015)
Mining, Concentration, Purification, Refining	Energy efficiency	Fe	Historic data	IAM model	x	Global	nan	premise uses IAM projections on production volume and energy used to calculate efficiency improvments	IAM efficiency changes are applied to all unit process inventory flows	Sacchi et al. (2022)
Mining	Energy efficiency	Co	Ore grade projections, ore grade/energy data	Regression analysis of ore grade/energy	x	Global	open-pit: Cu/Ni laterite, underground: Ni sulfide	Energy efficiency is determined via the energy/ore grade relation	Demand is the quantified functional unit	Van der Meide et al. (2022)
Mining, Concentration, Purification, Refining	Energy efficiency	Al, Fe	Historic data	Regression analysis	x	Global	nan	Energy efficiency in the production of aluminum and iron extrapolated into the future using historic data	Multiply yearly reduction rates (1.5% for Fe, 0.5% for Al) with energy inputs	Van der Voet at al. (2019)
Mining, Concentration, Purification, Refining	Energy efficiency	Fe	Historic data		x	Global	nan	Normative scenario for efficiency development to reach climat targets		Wang et al. (2021)
Concentration	Energy efficiency improvement of existing technology	Au, Fe	Test trials	Assumptions based on data sources	x	Canada	Pebbles addition in grinding	Assumptions based on test trials by Nkwanyana and Loveday (2017)		Kumar et al. (2020)
Purification, Refining	Energy efficiency improvement of existing technology	Al	Test trials	Assumptions based on data sources	x	Global	Drained cathodes	Assumtions of energy savings based on reported possible energy savings from switching a conventional cell of the Hall-Heroult electrolytic process to include drained cathodes.		Norgate and Jahanshahi (2011)
Purification, Refining	Energy efficiency improvement of existing technology	Fe	Historic data	IAM model	x	Global	nan	premise uses IAM projections on energy sources and demand as well as production volumes	IAM efficiency changes are applied to all unit process inventory flows	Sacchi et al. (2022)
Concentration	Grinding size	Co, Ni, Pb, Zn	Current estimate of grind size	Future estimate of grind size	x	Global	Ball mill	The bond equation (for a ball mill) was used to calculate the grinding energy consumption for current and future estimates of grinding sizes (based on literature)	E=WI*(10/sqr(P_80)-10/Sqr(F_80)); WI=15kWh h_e/t, Product and Feed 80% passing size = P_80, F_80	Norgate and Jahanshahi (2011)
Mining	Haul trucks fleet mix	nan	TRL	Business plan	x	Australia	Caterpillar, Komatsu	BHP has the plan to have operational trails in 2025 and deploy the electric trucks from 2028	nan	BHP (2023)
Mining	Haul trucks fleet mix	Au, Fe	Economic viability, lifetime of diesel haul trucks	Assumptions based on data sources	x	Canada	Diesel hybrid and electric trucks, ventilation system	Lifetime of diesel haul trucks is 10 year, 2031 diesel hybrid and electric fleet mix, 2041 electric fleet mix. Market shares claculated based on capital cost, operating and maintainance cost, energy cost. For underground mining additional savings in the reduction of ventialation need is considered.		Kumar et al. (2020)
Mining	Mine type (open-pit/underground)	Cu, Ni, Pb, Zn, Ag, U	Historic shares openpit/underground mines	nan	nan	Global	nan	Historic shares of open-pit vs. udnergorund mines	nan	Mudd (2010)
Mining, Concentration	Ore grade	Cu	Historical ore grade	Regression analysis	x	China	nan	Regression analysis of ore grade over time using historic ore grade data from CN	Power regression (apperently from Crowson (2020) but not findable): G=a*y^-b Energy/ore grade relation (apparently from Northey et al. (2014) but could not be found) : E =c*G^-d Relation is applied to all economic inflows related to energy (LCI is represented only as one unit process)	Dong et al. (2020)
Mining, Concentration	Ore grade	Cu	Historic production, Historic ore grade, Demand projections	Regression analysis	x	Global	nan	Regression analysis on ore grade in relation to cumulative production based on Historic data. Future production is assumed to meet final demand.	G(t)=1.88*e^(-1.13*10-9*Q(t)); with Q(t) cumulative production; E_pyro(t) 199*e^(-0.67*G(t)), E_hydro(t)=264*e^(-0.61*G(t))	Elshaki et al. (2016)
Mining, Concentration	Ore grade	Ni	Historic production, Historic ore grade, Demand projections	Regression analysis	x	Global	nan	Unclear how ore is projected but propably: Regression analysis on ore grade in relation to cumulative production based on Historic data. Future production is assumed to meet final demand.	Ore grade energy relation: E_pyro(t)=169.53*g^-0.067; E_hydro(t)=199.51*g-0.844	Elshaki et al. (2017)
Mining, Concentration	Ore grade	Co, Ni, Pb, Zn	Historical ore grade	Regression analysis	x	Global	nan	Regression analysis of ore grade over time based on historical data.	Same approach as Van der Voet et al. (2019)	Harpprecht et al. (2021)
Mining, Concentration	Ore grade	Cu, Ni, U, Pb, Zn, Ag, Al, Fe, Mn	Historic ore grades	nan	nan	Global	nan	Historic ore grades over time	nan	Mudd (2010)
Mining, Concentration	Ore grade	Ni	Historical ore grade	nan	nan	Global	nan	Historic ore grades over time	nan	Mudd and Jowitt (2014)
Mining, Concentration	Ore grade	Cu	Historical ore grade	nan	nan	Global	nan	Historic ore grades over time	nan	Mudd et al. (2013)
Mining, Concentration	Ore grade	Pb, Zn	Historical ore grade	nan	nan	Global	nan	Historic ore grades over time	nan	Mudd et al. (2017)
Mining, Concentration	Ore grade	Cu	Historical production, historical ore grade, URR estimates, Demand projections	GeRs-DeMo, regression analysis	x	Global	nan	Cumulative grade-tonnage curves are applied to mines and their respective production determined by historical data and estimated URRs. The GeRs-DeMo model calculates the average ore grade based on lower ore grade deposits being mined first.	nan	Northey et al. (2014)
Mining, Concentration	Ore grade	Co	Historical production, Historical ore grade, Demand projections	Regression analysis	x	Global	nan	Regression analysis on ore grade in relation to cumulative production based on historical data. Future production is assumed to meet final demand. Final demand is based on copper and nickel demand projections by Elshaki et al. (2016)	E to G relation from Calvo et al. (2016); connection to inventory via identifying all energy related flows from mining and concentration; linear link of tailings increase with reduction of ore grade (100%/(100%-percentage of ore grade decline)*tailings amount; also linking to captial good consumption; see Table 1 in SI for data on regression analysis of ore grade per cumulative production	Van der Meide et al. (2022)
Mining, Concentration	Ore grade	Cu, Ni, Pb, Zn	Historical ore grade	Regression analysis	x	Global	nan	Regression analysis of ore grade over time based on historical data from Mudd et al. (2017), Mudd (2013), Mudd and Jowitt (2014)	Power regression: Ore grade over time: G = a*y^-b; Energy ore grade relation: E = c*G^-d (See SI1 for variable quantification); Equation used to adapt all energy inuts to inventory	Van der Voet et al. (2019)
Mining, Concentration	Ore grade	Co	Historic ore grade	Regression analysis	x	Global	nan	The study establishes energy/ore grade relations for Cu, Zn/Pb, Au. For Cu it analysis historic trends of energy and ore grade.	See Figure 3 for E to G relation	Calvo et al. (2016)
Mining, Concentration	Ore grade	Cu, Ni, Pb, Zn	Historical ore grade	Assumption based on data	x	Global	nan	Assumption of ore grade decline of 1% per year based on historical data from Mudd (2007)	Energy ore grade relation not available	Norgate and Jahanshahi (2011)
Mining, Concentration	Ore grade	Ag, Al, Au, Co, Cr, Cu, Fe, Ga, Ir, Li, Mg, Mo, Ni, Pd, Pt, Rh, Ru, Si, Sn, Ta, Ti, V, W, Zn, Zr	Current (2017, 2018, 2019) ore grades	nan	nan	Global	nan	Representation of current state with reference year of 2018 (2017 and 2019 used to fill data gaps) based on company reports (also S&P)	nan	Nassar et al. (2022)
Mining	Other machinery fleet mix	nan	Industry experts	Assumptions based on data sources	x	nan	nan	Estimations of experts from International Mining, Team Publishing Ltd, see a >40% market share of electric mining equipment in 2030 adopted first by underground mining operations		Gleeson (2018)
Mining	Other machinery fleet mix	nan	TRL	Business plan	x	Australia	Progress Rail, Wabtec locomotives	BHP has the plan to have operational trails in 2024 and deploy the electric locomotives from 2027	nan	BHP (2023)
Mining	Other machinery fleet mix	nan	TRL	Business plan	x	Australia	Liebherr excavators	BHP has the plan to have operational trails in 2024 and deploy the electric excavators from 2027	nan	BHP (2023)
Market	Primary production share	Li	Historical production, demand estimates	Logistic growth model	x	Global	Lithium ion batteries	Historical production is combined with demand estimates to derive future production	Share of inflows in market process	Ambrose and Kendall (2020)
Market	Primary production share	Cu	Demand projections, secondary supply projections	Substraction	x	Global	nan	The primary supply is claculated through susbtracting the secondary supply form the total demand.	Share of inflows in market process	Elshaki et al. (2016)
Market	Primary production type share: country/region	Ag, Al, As, Au, B, Ba, Be, Bi, Cd, Ce, Co, Cr, Cu, Dy, Er, Eu, Fe, Ga, Gd, Ge, Hf, Hg, Ho, In, Ir, La, Li, Lu, Mg, Mn, Mo, Nb, Nd, Ni, Os, Pb, Pd, Pr, Pt, Re, Rh, Ru, Sb, Sc, Se, Sm, Sn, Sr, Ta, Tb, Te, Th, Ti, Tl, U, V, W, Y, Yb, Zn, Zr	Annual production by country on mine stage and processing stage level	nan	nan	Global	nan	Annual production shares of countries on a mine stage (from World Mining Data) and processing stage (from European Commission & World Mining Data, USGS) incl. some other sources (also includes average market prices)	Share of inflows in market processes	Lai et al. (2025) [SI2]
Market	Primary production type share: country/region	Cu	Historic shares, URR	Regression analysis, GeRs-Mo	x	Global	Deposit types	Historic shares of deposit types combined with ultimate recoverable resource (URR) estimates per deposit type. Used to run GeRS-DeMo model.	Share of inflows in market process	Northey et al. (2014)
Market	Primary production type share: deposit type	Cu	Historic shares	Regression analysis (exponential)	x	Global	Pyro/-hydrometallurgical	Regression analysis of historic shares over time	Share of inflows in market process	Harpprecht et al. (2021)
Market	Primary production type share: deposit type	Cu	Historic shares	Regression analysis	x	Global	Pyro/-hydrometallurgical	Regression analysis of historic shares over time (approach also adapted by Harpprecht et al., 2021)	Share of inflows in market process	Kuipers et al. (2018)
Market	Primary production type share: deposit type	Cu	Historic shares, URR	Regression analysis, GeRs-Mo	x	Global, national	nan	Historic shares of deposit types combined with ultimate recoverable resource (URR) estimates per deposit type. Used to run GeRS-DeMo model.	Share of inflows in market process	Northey et al. (2014)
Market	Primary production type share: deposit type	Co	Demand (per use category) projections, share secondary supply projections	Connection of use category to deposit tytpe/production pathway	x	Global	nan	Deposit types are directly linked to specific production pathways. Use categories were connected to production pathways based on assumptions based on literature. Some production pathways were assumed as fixed shares. The secondary supply was substracted from the final demand and primary supply was split between the production routes.	Share of inflows in market process	Van der Meide et al. (2022)
Market	Primary production type share: deposit type, ore grade	Li	Historical production costs, URR estimates per deposit, minimum design years of production facility estimates	Regression analysis, economic resource model	x	Global, national	Lithium ion batteries	Cost of deposit types, ore/brine quality, and country combinations are derived by running a regression analysis on historical production cost. URR per deposit (per country) estimates and minimum desgn (operation) years of production facilites are used to derive a cost optimal production per year to satisfy demand.	Share of inflows in market process	Ambrose and Kendall (2020)
Market	Primary production type share: mining/concentration sites	C, Co, Cu, Dy, Li, Nd, Ni, Pr, Tb	Company reports, S&P Global Market Intelligence, Wood Mackenzie, and Benchmark Mineral Intelligence	Estimations/scenarios of future projects to come online	x	Global, national	Renewable energy technologies	Based on current and announced projects: existing assets and those under construction, projects that have a high chance of moving ahead. This includes projects that have obtained necessary permits, secured financing, and established offtake contracts.	Share of inflows in market process	IEA (2024)
Market	Primary production type share: mining/concentration sites	Li	S&P Market Intelligence	Estimations/scenarios of future projects to come online	x	Global, national	nan	Based on current and announced projects	Share of inflows in market process	Istrate et al. (2025)
Market	Primary production type share: mining/concentration sites	Nd, Pr, Dy, Pb (REE)	S&P Market Intelligence, annual reports, feasibility studies	Assumptions based on data sources	x	Global	see Marscheider-Weidemann et al. (2021)	Mining sites are grouped by deposits. Future supply equals demand (taken from Marscheider-Weidemenn et al., 2016). Supply by site differes per scenario and is based on: development stage, approved mining & processing techniques as well as exisiting infrastrucutre or the expenditures for its construction, RE content (as well as ratios of REEs) in deposit and how this fits to the demand for differe…	Share of inflows in market process	Langkau and Erdmann (2021)
Market	Primary production type share: mining/concentration sites	nan	nan	PEMMSS	x	nan	nan	The PEMMSS model projects what mine sites will supply a certain demand. Necessary inputs to the model are: model setup parameters (e.g., scenarios, time frame), RM specific parameters (e.g., co-production, net value, demand). Then the model runs for each scenario for the specified time frame. The model tries to satisfy the demand with the mines with highest net present value first (mines with hig…	Share of inflows in market process	Norhtey et al. (2023)
Market	Primary production type share: purification/refining technology	Li	Historical production costs, URR estimates per deposit, minimum design years of production facility estimates	Regression analysis, economic resource model	x	Global	Lithium ion batteries	The deposit type is connected to a production pathway. Cost of deposit types, ore/brine quality, and country combinations are derived by running a regression analysis on historical production cost. URR per deposit (per country) estimates and minimum desgn (operation) years of production facilites are used to derive a cost optimal production per year to satisfy demand.	Share of inflows in market process	Ambrose and Kendall (2020)
Market	Primary production type share: purification/refining technology	Cu	Historical shares	Regression analysis	x	China	Pyro/-hydrometallurgical	Shares of pyro-/hydrometalugrical production projected via regression analysis on historic shares	Share of inflows in market process	Dong et al. (2020)
Market	Primary production type share: purification/refining technology	Cu	International Copper Study Group (ICSG) projections	Assumptions based on data sources	x	Global	Shaft furnace, Outokumpu flash furnace	Expected market shares of both technologies	Share of inflows in market process	Kulczycka et al. (2016)
Market	Primary production type share: purification/refining technology	Cu	Historic shares	Regression analysis	x	Global	Ernest Henry, Mt Isa, Mt Lyell, Olympic Dam, Osborne	Historic production shares by technolgy	Share of inflows in market process	Memary et al. (2012)
Market	Primary production type share: purification/refining technology	Cu	Historical shares	Regression analysis	x	Global	nan	Regression analysis of shares of pyro-/hydrometalurgical production over time	Share of inflows in market process	Van der Voet at al. (2019)
Market	Primary production type share: purification/refining technology, deposit type	Co	Demand (per use category) projections, share secondary supply projections	Connection of use category to deposit tytpe/production pathway	x	Global	nan	Deposit types are directly linked to specific production pathways. Use categories were connected to production pathways based on assumptions based on literature. Some production pathways were assumed as fixed shares. The secondary supply was substracted from the final demand and primary supply was split between the production routes.	Share of inflows in market process	Van der Meide et al. (2022)
Market	Primary/Secondary production type share: purification/refining sites	all	S&P Market Intelligence	nan	nan	Global, regional, national		S&P provides information on the purification and refinign facilities	nan	S&P Market Intelligence
Purification	Reagent substitution	Ag	Current technology	nan	nan	nan	Cyanide leaching	Leaching of cyanide can already be substiuted with alternatives	nan	Zhang et al. (2022)
Concentration	Recovery efficiency improvement of existing technology	Ag, Al, Au, Co, Cr, Cu, Fe, Ga, Ir, Li, Mg, Mo, Ni, Pd, Pt, Rh, Ru, Si, Sn, Ta, Ti, V, W, Zn, Zr	Current (2017, 2018, 2019) concentration recovery efficiency	nan	nan	Global	nan	Representation of current state with reference year of 2018 (2017 and 2019 used to fill data gaps) based on company reports (also S&P)	nan	Nassar et al. (2022)
Purification, Refining	Recovery efficiency improvement of existing technology	Ag, Al, Au, Co, Cr, Cu, Fe, Ga, Ir, Li, Mg, Mo, Ni, Pd, Pt, Rh, Ru, Si, Sn, Ta, Ti, V, W, Zn, Zr	Current (2017, 2018, 2019) refining efficiency	nan	nan	Global	nan	Representation of current state with reference year of 2018 (2017 and 2019 used to fill data gaps) based on company reports (also S&P)	nan	Nassar et al. (2022)
Purification	Reductants substitution	Fe	TRLs, industry information, costs	bottom-up energy systems model taking into account costs	x	Global	Hydrogen, bioenergy	The model aligns substiution of reductants with broader climate change scenarios, based on current TRLs and costs		IEA (2020)
Market	Secondary production share	Ni	Current recycling rates	Maximum technological feasibility	x	Global	from steel products	Based on current shares, assumptions are made for current status, maximumn technological feasibility and no recycling at all scenarios	Modeled as share of global production	Eckelman (2010)
Market	Secondary production share	Cu	Historic secondary shares, lifetimes, recycling rates and efficiencies	Stock and flow model	x	Global	Built-in appliances, consumer EEE, instrustrial EEE, infrastructure, motor vehicles, wiring, plumbing, on-site waste, other transport	Stock model used to extrapolate historic trends (data on lifetime, recycling rates and efficiencies not found)	Share of inflows in market process	Elshaki et al. (2016)
Market	Secondary production share	Ni	Historic secondary supply shares, life time, recycling rates	Growth rate assumptions	x	Global	nan	Growth rate assumptions based on historic shares, life time of products and recycling rates	Share of inflows in market process	Elshaki et al. (2017)
Market	Secondary production share	Al, Co, Fe, Mn, Ni, Pb, Zn	Historic secondary supply shares, life time & in use dissipation & recycling rate for different use categories of the metals	?	x	Global	nan	Derives average annual secondary flow growth rates from Historic data and current parameters (life time, in use dissipation, recycling rate) for different metal use categories	Share of inflows in market process	Elshaki et al. (2018)
Market	Secondary production share	Fe	Lifetime of different products, recycling rate, collection rate	dMFA	x	Global	nan	The study assumes different increasing collection rates in line with scenarion storylines.	Share of inflows in market process	IEA (2020)
Market	Secondary production share	Ag, Al, As, Au, B, Ba, Be, Bi, Cd, Ce, Co, Cr, Cu, Dy, Er, Eu, Fe, Ga, Gd, Ge, Hf, Hg, Ho, In, Ir, La, Li, Lu, Mg, Mn, Mo, Nb, Nd, Ni, Os, Pb, Pd, Pr, Pt, Re, Rh, Ru, Sb, Sc, Se, Sm, Sn, Sr, Ta, Tb, Te, Th, Ti, Tl, U, V, W, Y, Yb, Zn, Zr	EoL-RIR	nan	nan	Global	nan	Global shares of EoL-RIR that express the share of material from old scraps recycling within the global production (primary + secondary)	Share of inflows in market processes	Lai et al. (2025) [SI2]
Market	Secondary production share	Al	Recycling rates, lifetime	SD, stock and flow	x	China	nan	SD model combines with stock and flow to estimate secondary supply	Share of inflows in market process	Li et al. (2017)
Market	Secondary production share	Al	Lifetime of different products	MFA	x	China	unknown	MFA using stock and unifrom lifetime distribution	Share of inflows in market process	Li et al. (2021)
Market	Secondary production share	Co	Demand (per use category), lifetime, recycling rates	dMFA	x	Global	Appliances, cars, electricity generation from Deetman et al. (2018)	A dMFA model is fed with demand per use category and lifetime, recycling rate data	Share of inflows in market processes; unclear how share of secondary pyro- vs hydrometallurgical treatment was derived	Van der Meide et al. (2022)
Market	Secondary production share	Al, Cu, Fe	Historical stock, projected demand, lifetimes, recovery rate	dMFA	x	Global	Buildings sector	Using a dMFA model to derive secondary supply	Share of inflows in market process	Zhong et al. (2021)
Mining	Strip ratio	Ag, Al, Au, Co, Cr, Cu, Fe, Ga, Ir, Li, Mg, Mo, Ni, Pd, Pt, Rh, Ru, Si, Sn, Ta, Ti, V, W, Zn, Zr	Current (2017, 2018, 2019) strip ratios	nan	nan	Global	nan	Representation of current state with reference year of 2018 (2017 and 2019 used to fill data gaps) based on company reports (also S&P)	nan	Nassar et al. (2022)
Concentration	Technology switch	Cu	Case study	nan	nan	nan	Recycled Vegetable Oil (RVO) as collector in flotation using seawater	The study demonstrates the feasibility of using RVO as acollector in the flotation application using seawater (instead of freshwater).	nan	Arcos and Uribe (2021)
Purification, Refining	Technology switch	Fe	TRLs, industry information	Assumptions based on data sources	x	Global	DRI (H2 or CH4)	The study assumes different adoption rates of DRI technology based on hydrogen and natural gas.		IEA (2020)
Concentration	Technology switch	Li	Case study	Calculations based on data source	nan	Australia	High pressure grinding rolls	For Greenbushes (Western Australia) case study a HPGR was implemented comparing it to tradidtional ball mill operation and calculating emission reductions.	Addition of HPGR LCI to the ivnentory and adjustment of material/energy flows	Khakmardan et al. (2025)
Concentration	Technology switch	Li	Case study	Calculations based on data source	nan	Australia	Alternative grinding balls material	Material choice for the ball mills can reduce environmental impacts e.g., by choosing carbon steel or ferromanganese alloy steel instead of chromium steel	Exchanginge the material flow associated with the grinding balls	Khakmardan et al. (2025)
Concentration	Technology switch	Au, Fe	Test trials	Assumptions based on data sources	x	Canada	High pressure grinding roll, stirr milled curcuits	HPGR and and stirr mill circuits can significantly reduce energy consumption		Kumar et al. (2020)
Concentration	Technology switch	nan	Current SotA	nan	nan	nan	Bioflotation	Description of advancements in the field of bio-metallurgy	nan	Mishira et al. (2023)
Concentration	Technology switch	nan	Current SotA	nan	nan	nan	Bioflotation	There is an extensive research body on using bio-reagents (biofrother, biocollector, biodepressant, bioactivator etc.) in flotation experiments, with the consensus that these come less environmentally harming impacts compared to conventional alternatives, but LCA studies quanitfying these effects are lacking. Bioflotation has the potential to decrease environmental impacts as it reduces energy re…	nan	(Aksoy et al., 2022)
Purification	Technology switch	nan	Current SotA	nan	nan	nan	Bioleaching	Description of advancements in the field of bio-metallurgy	nan	Mishira et al. (2023)
Purification	Technology switch	nan	Current SotA	nan	nan	nan	Bioflocculation	Description of advancements in the field of bio-metallurgy	nan	Mishira et al. (2023)
Concentration	Technology switch	Co, Ni, Pb, Zn, Fe, Al	Test trials	Assumptions based on data sources	x	Global	High pressure grinding roll	Based on the application of HPGRs in the cement indsutry, assumptions of potential reductions are applied to metalliferous ores.		Norgate and Jahanshahi (2011)
Concentration	Technology switch	Co, Ni, Pb, Zn, Fe, Al	Test trials	Assumptions based on data sources	x	Global	Stirred mill	For fine grind size stirred mills could replace tradidtional ball mills making the grinding process more efficient.		Norgate and Jahanshahi (2011)
Mining, Concentration, Purification, Refining	Technology switch	Li, Co, REEs	Current SotA	nan	nan	nan	Recovery from mine tailings	The study reviews hydrometallurgical and bio-hydrometallurgical techniques that are used to extract materials from tailings.	nan	Sarker et al. (2022)
Purification	Technology switch	Fe	TRLs, industry information, costs	bottom-up energy systems model taking into account costs	x	Global	Electrolysis	The model aligns the implementation of electrolysis with broader climate change scenarios, based on current TRLs and costs		IEA (2020)
Concentration	Regents substitution	Au	Current technology	nan	nan	nan	Organosolv lignin partially replacing sodium isoprpyl xanthate (SPIX)	16.8% reduction of GWP impacts due to collector alternative	Change of collector and material/energy requirements of process	Peppas et al. (2024)
Purification	Bioleaching	Cu	Current technology	nan	nan	nan	Biomchemical oxidation + acid vs. sulfuric acid	Reduction of sulfuric acid need (-40%) due to biochemical oxidation		Koizhanova et al. (2023)
Concentration	Technology switch	nan	Pilot scale testing	nan	nan	nan	HPGR, and Vertical roller mill (VRM)	10-30% energy reduction is reported	nan	Jankovic et al. (2016)
Concentration	Technology switch	nan	Pilot scale testing	nan	nan	nan	HPGR	up to 50% reduction in energy consumption	nan	Saramak (2012)
Concentration	Technology switch	nan	Experimental data	nan	nan	nan	Microwave pretreatment	Demonstrates a 27% comminution energy reduction via microwave pretreatment	nan	Asgari et al. (2024)
Concentration	Technology switch	nan	Pilot scale testing	nan	nan	nan	Microwave pretreatment	Demonstrates a pilot-scale, continuous microwave pretreatment of run-of-mine ore with energy reductions between 9% and 24% for the grinding process	nan	Batchelor et al. (2017)
Concentration	Recovery efficiency improvement of existing technology	Au	Test trials	nan	nan	nan	Sensore-based ore sorting	XRT + laser sorting increased gold recovery from refractory ore to 88% in 50% of the original mass, with up to 1.75–1.8× upgrade in feed grade. The plant achieved ~89.9% overall gold recovery after implementing SBS—an improvement attributable directly to this recent technology.	nan	Assis et al. (2021)
Concentration	Recovery efficiency improvement of existing technology	Zn	Test trials	nan	nan	nan	Sensor-based ore sorting + dense-medium separation	Dense-medium separation removed 30% mass with >97% Zn recovery. XRT sorting achieved ~93% Zn recovery while discarding 30% mass. Both approaches show robust, quantified step changes in recovery versus conventional approaches.	nan	José et al. (2019)
Mining, Concentration	Technology switch	nan	Experimental data	nan	nan	nan	In-situ leaching	Effects of in -situ leaching especially on underground water need further studies across minerals types and LCA studies do not exist.	nan	Lyashenko et al. (2022), Sapsford et al. (2019)
Purification	Technology switch	U	Test trials	nan	nan	nan	Bioleaching	Review of bioleachig uranium. Bioleaching refers to the dissolution of metals from its ores/ concentrates and/or other metal bearing resources through the aid of microorganisms.	nan	Abhilash and Pandey (2013)
Purification	Technology switch	In	Experimental data	nan	nan	nan	Bioleaching	Performs ex-ante (lab-scale, low-TRL) LCA for bioleaching and benchmarks against two existing chemical leaching processes across four impact categories		Flake and Höck (2019)
Purification	Technology switch	Cu	Experimental data	nan	nan	nan	Bioleaching	Applies cradle-to-gate LCA to lab-scale bioleaching of e-waste versus industrial pyrometallurgical (smelter-refinery) process, using 1 kg Cu as functional unit. High electricity use leads to higher impact categories of bio vs conventional leaching.		Villares et al. (2017)
Cocnentration	Technology switch	nan	Current SotA	nan	nan	nan	Sensor-based sorting	The adaption of sensor-based ore sorting can significantly increase recovery rates	nan	Assis et al. (2021)

## Sheet: SI 1.3 - List of interviewees
Participant ID	Role	Organization	Field / Area of Expertise	Interview Date
E01	Researcher	Academia	Environmental impacts of mining	2025-07-01
E02	Professor	Academia	Life cycle assessment (focus on primary and secondary supply)	2025-06-01
E03	Researcher	Geological survey institution	Primary mineral commodity market and mining exploration	2025-05-01
E04	Researcher	Geological survey institution	Primary mineral commodity market and mining exploration	2025-05-01
E05	Project manager	Mining/processing company	Primary mineral commodity supply in the EU	2025-06-01
E06	Project leader	Mining/processing company	Primary mineral commodity supply in the EU	2025-06-01
E07	Researcher	Academia	Sustainable mining, mine economics	2025-06-01
E08	Researcher	Academia	Life cycle assessment/environmental impact assessment in primary mineral commodity supply	2025-06-01
E09	Researcher	Public research institution	Minerals process engineering	2025-07-01
E10	Professor	Academia	Mining technology and economics	2025-07-01
E11	Manager	Mining/processing company	Sustainability department	2025-09-01
E12	Project manager	Geological survey institution	Hydrometallurgical process engineering	2025-09-01
E13	Project leader	Public research institution	Primary and secondary metal commodity market	2025-07-01
E14	Project leader	Mining/processing company	Sustainability department	2025-09-01
E15	Project leader	Public research institution	Secondary mineral commodity market	2025-10-01
E16	Manager	Mining/processing company	Sustainability department	2025-09-01

## Sheet: SI 1.4 - LCI stages & processes
Stage	Input	Output	Process Category	Process	Desciption	Technology examples	Description
Mining	Ore, Gangue, Overburden	Ore	Fragmentation	Drilling	Drills are used to make holes in rock into which explosives are installed. Together with blasting, this is the first fragmentation of in situ minerals, and it is the starting point for most mineral processes	Air rotary drill (open-pit)	Air pressure poweres drill, lifts the cuttings up the dril stem and cools the drill at the same time
						Mechanical drill (underground) (remotley operated longhole dril/drill jumbo)	Powered by electricity or fuel, uses water as lubricant and cooling
				Blasting	The blast should just lift up the rock mass and fracture it, after which the fractured rock settles.	Ammonium nitrate crystals & fuel oil (ANFO)	Common bulk explosive, stable and cost-effective; detonated by booster charge
						Tovex (water gels)	Aqueous solution of ammonium nitrate and methylammonium nitrate, fuels
						Dynamite	High-energy explosive, used in controlled applications; sensitive and powerful
			Material handling	Excavation & Loading	Excavators dig out the blasted rock and load it onto the hauling trucks	Electric rope shovel	Electrically powered, efficient for large-scale excavation
						Hydraulic shovel	Uses hydraulic power for flexible and precise digging
				Transportation	The blasted rock (or brine) has to be transported to the beneficiation facilities	Hauling truck	Used in open-pit mining for long-distance hauling of large volumes. Electric trucks can include trolley assist systems.
						Conveyer belt	Continuous transport system ideal for fixed paths
						Pipe	Often used in slurry transport or for brine in solution mining
			Infrastructure	Supporting infrastructure	This includes lights, ventilation systems, rock support systems, pumps for keeping the water table low, buildings for machinery maintainance/refueling, operation controls, etc… for either open-pit oder underground mining	Open pit	Includes surface access systems like ramps, dewatering, lighting
						Underground	Includes ventilation shafts, lifts, pumping systems, and communication networks
Concentration	Ore	Concentrate	Size reduction	Crushing	Controlled size reduction stage. The rock is crushed to a (for conveyer belts) transportable size	Gyratory crusher	for high throughput operations >500 t/h
						Cone crusher	for high throughput operations >500 t/h
						Jaw crusher	< 500 t/h
						In-pit crusher	In-pit crushers are used in combination with conveyer belts as an alternative to conventional hauling with consecutive crushing.
				Grinding/Milling	The crushed ore is further grinded/milled to reduce particle size. This is the size reduction stage where the value minerals are liberated from the host rock (i.e., the liberation size is reached)	AG mill	ore (mostly wet) itself breaks down material, for very hard ores, coarse feed size
						SAG mill	ore (mostly wet) and added media (most commonly steel balls) break down ore, primary grinding, medium to coars feed size
						ball mills	only added media breaks down ore (mostly wet), secondary/tertiary grinding, fine feed size
			Size control	Screening	Crushed and ground ore enter a screening/filtering process where coarse particles are recirculated to crushing/grinding steps and fine particles get to the next processing step	Trommel screens	Inclined tube rotating with different sized mesh walls to sort material
						Vibrating screens	Inclined plate vibrating with different sized mesh bottom
				Dewatering	The slurry undergoes processes to separate the liquid from the solid components.	Hydrocyclones	Slurry as feed, overflow = fines, underflow = coarse, uses centrifugal force to speed up separation (at high pressure), also used fro dewatering
						Thickener	I.e. tank to give time to solids to settle on ground
						Drying (Evaporation)	The slurry is heated so that water evaporates. This can be done using solar heat in outdoor evaporation ponds or heat generation using fossil fuels/electricity.
						Filtration	The slurry is forced through a filter medium to separate solid particles from the liquid. Different filtration techniques can apply, like pressure filter, tube press and vacuum press.
				Froth flotation	Slurry from ginding = input (then called pulp), a collector is added to the slurry to to make particles hydrophobic, air is blow in from the bottom so that particles (mixture of collector and slurry) bind to air bubbles, they are collected in a froth on top where a frother is added to make it stiff and stable, the froth is taken off (concentrate) and the remains flow to the next flotation cell (1…	Mechanical flotation	Uses mechanical agitation to mix slurry and introduce air bubbles
						Column flotation	Tall, cylindrical flotation cell where air is introduced at bottom, creating counter current flow of bubbles rising and slurry descending
						Pneumatic flotation	Only compressed air and no mechanical agitation
				Separation	Gravity separation: Uses different weights of materials to separate them. Magnetic separation: Seperates materials with different magnetic properties.	Jig concentrators	uses pulsating water currents
						Shaking tables	inclined surface with virbations moves heavier particles to one side
						Spiral concentrators	Helical trough allows heavy minerals to move inward and lighter ones outward
						Dense media separation (DMS)	Uses a dense liquid (ferrofluid) where heavier minerals sink and lighter ones float
						Centrifugal concentrators	Uses spinning motion to enhance gravity effect, concentrating heavy minerals
						Dry/wet magnetic sperations
						High/low intentsity magnetic seperation
			Waste management	Tailings disposal		Tailings storage facility (TSF)	Ponds
							Dry-stacking
						Backfill	Common practice in underground mines
						Reprocessing
Purification	Concentrate	Intermediate	Hydrometallugrical	Leaching	Ore is dissolved in acid to extract metal	Heap leaching	Crushed/ground concetrate is stacked on a heap and leach solution is prayed/irrigated on top
						Dump leaching	Concentrate dumped after drilling and blasting and then ripped by bulldozers; leach solutions prayed on top
						In-situ leaching	Leach solution direclty applied where rock is mined, for low grade minerals as this reduces transportation costs. The leach solution is transported through a pipe to further processing steps.
						Vat leaching	Concentrate into vessel and leach solution enters from below, preganant leach solution is collected at the top
						Tank leaching	Concentrate in tank with leach solution, solution in tank is mechanically agitated
						Pressure leaching	Reactor vessel with high temperature and pressure
						Bioleaching	Microorganisms are used at catalysts to produce chemical lixiviant which is used for leaching sulfide minerals
				Neutralisation	Adding of neutralising agent to increase pH from acid leaching	Nautralisation with lime stone
				Solvent extraction	Metal from aqueous solution to organic solvent	Cationic	Metal ion exchanges cations with protons from a protonated solvent/extractant
						Solvation	Neutral metal salt in organic solvent
						Anionic	Metal ion extracted as anionic compleses (only effective when strong anionic ligands are present)
						Chelation	Metal ion form chelation compand with organic anion (chelation agent)
						Ionic Liquid	in exploration
				Crystallization	Recovers solids in crystalline form from solutions	Evaporation	Heating to evaporate solvent
						Cooling	Colling to crystallize minerals/metals
						Eutectic freeze crystallization (EFC)	in exploration
				Precipitation	Solid particles form from solution vie chemical reaction (crystallization)	Hydrolysis	Water used to break down metal bonds
						Electrochemical reduction	Cementation or metal displacement is described as the electrochemical pre Also called cementation or metal displacement is the electrochemical cipitation of a metal from solution by another more electro positive metal
						Ionic precipitation	Uses Ions to bind together and precipitate out of the solution
						Hydroxide precipitation	Add alkaline agent (pH>7) increases pH and removes metal as hydroxide
						Sulfide precipitation	Addition of sulfide source agent to precipitate the metal as a sulfide salt
				Electrolysis	Reduction of metal ions to metallic form in a solution using electric current	Electrolytic reduction	Reduction of metal in solution via electrodes and electric current
						Electrowinning	Depositing of metals to electrodes from solution
				Ion exchange	Exchange of ions between solution (w/ RM) and exchange resin
			Pyrometallurgical	Agglomeration	Fine particles into larger shapes + binding them together to give agglomerates mechanical strengh for further processing.	Sintering	Fine particles are heated without melting them, so that they fuse together. This process does not use a binder (and is sometimes also categorized under roasting)
						Pelletization	Binder (incl. moisture) is added to roll fine particles into a "green ball"to be then heated/dryied to sinter together
						Briquetting	Binder is added to press fine particles mechanically together
				Calcination	Heating with limited oxygen, to remove substances (e.g., decomposition of hydrates to remove water and/or carbonates to oxides to remove carbon dioxide)	Rotary klin	Rotating horizontal "tube" where material is moved throught the kiln by rotation at high temperatures
						Shaft kiln	Stationary vertical "tube" where meterial is fed from the top and undergoes heating, calcination and cooling at high temperatures. Shaft kilns are usually less efficient than rotary kilns.
						Flash calciners	The input feed has to be finley ground to be fed into a hot gas stream. The particels are suspended in the gass (also called entrainment) and almost instantly heated. After heating and reacting, the material is cooled and collected using cyclones or filters.
						Rotary hearth	A circular hearth rotates moving the material from inside to outside. The rotary hearth furnace can be heated by electricty or carbon sources that are combusted.
						Electric resistance furnace	Electric current goes through resistive heating elements like graphite that heat up and transfer the heat to their enviornment.
						Fluidized-bed	A bed of solid particles is suspended in a upward flow of gas/liquid making the solid behave like a fluid.
						Multiple-hearth calciner (vertical calciner)	Multiple horizontal circular hearths are vertically stacked on top of each other. Material drops down through hearths. Burners or electr heaters suplly heat.
				Pressure oxidation	Slurry preheated and pressureized in autoclave to achieve specific oxidation for furher processing (also leaching)	Autoclave	Pressureized vessel at elevated temperatures usually by the use of steam or other gases.
				Roasting (oxidation)	Replaces all or part of the sulfur from sulfide metal with oxide producing metal oxides. Product oft called calcine. Oxidation of sulfides with injected oxygen to prepare for smelting (purpose is to obtain optimal sulfur content for smelters or remove sulfur and replace it by oxide).	Fluidized-bed	A bed of solid particles is suspended in a upward flow of gas/liquid making the solid behave like a fluid.
						Multiple-hearth roaster	Multiple horizontal circular hearths are vertically stacked on top of each other. Material drops down through hearths. Burners or electr heaters suplly heat.
						Flash roasters	Hot gas is introduced into the feed almost instantly heating it.
				Roasting (sulfation)	Converts sulfides (S) to sulfates (SO4)	Fluidized-bed	A bed of solid particles is suspended in a upward flow of gas/liquid making the solid behave like a fluid.
						Multiple-hearth roaster	Multiple horizontal circular hearths are vertically stacked on top of each other. Material drops down through hearths. Burners or electr heaters suplly heat.
				Roasting (reduction)	Lower oxide states or completely reduce oxide to metal	Multiple-hearth roaster	Multiple horizontal circular hearths are vertically stacked on top of each other. Material drops down through hearths. Burners or electr heaters suplly heat.
				Roasting (chlorination)	Metallic oxides to chlorides by heating with chlorine source	Multiple-hearth roaster	Multiple horizontal circular hearths are vertically stacked on top of each other. Material drops down through hearths. Burners or electr heaters suplly heat.
						Rotary kiln	Rotating horizontal "tube" where material is moved throught the kiln by rotation at high temperatures
				Roasting (volatination)	Eliminates easily volatilized oxides by converting them to gases	Fluidized-bed	A bed of solid particles is suspended in a upward flow of gas/liquid making the solid behave like a fluid.
						Multiple-hearth roaster	Multiple horizontal circular hearths are vertically stacked on top of each other. Material drops down through hearths. Burners or electr heaters suplly heat.
				Smelting (reduction)	Reduction of oxide using carbon to remove oxygen	Blast furnace	Uses coke as both a fuel and reducing agent.
						Electric arc furnace	Heat is generated by electric arcs between electrodes, passing through the charge and heating it.
						Flash furnace	The charge is heated in a short amount of time via the introduction of hot gas (mostly oxygen enriched air and sometimes fuel).
				Smelting (oxidation)	Oxidation of e.g., sulfides with injected oxygen	Converter furnace	Hot oxygen is blown in the molten metal.
						Flash furnace	The charge is heated in a short amount of time via the introduction of hot gas (mostly oxygen enriched air and sometimes fuel).
				Smelting (matte)	Reduction of sulfids using carbon to homogonize sulfide to matte	Reverberatory furnace	Fuel is combusted and reflected of the furnace roof to transfer the heat to the charge, slowly heating it.
						Electric arc furnace	Heat is generated by electric arcs between electrodes, passing through the charge and heating it.
						Electric resistance furnace	Electric current goes through resistive heating elements like graphite that heat up and transfer the heat to their enviornment.
Refining	Intermediate	Refined product	Pyrometallurgical	Smelting	Oxidation	Converter furnace	Hot oxygen is blown in the molten metal.
				Electrolysis	Reduction of molten metal ions to metallic form using electric current	Electrorefining	A impure anode is dissolved in e electrolyte solution and the metal is deposited in its purified form onto the cathode.
			Hydrometallugrical	Electrolysis	Reduction of metal ions to metallic form in a solution using electric current	Electrowinning	Metal ions in an aqueous solution are reduced and deposited onta a cothode.
				Leaching	Purified metal into acid to further leach out impurities	Pressure leaching	Reactor vessel with high temperature and pressure
Collection	Scrap	Collected scrap		Collection from consumer		Curbside collection	Collection of personal bins from single-family homes or shared bins from apartment blocks
						Drop-off collection points
						Recycling centers
						Producer responsibility	Producers organize collection
						Deposit-return	Consumer pay a deposit when buying an item
				Collection from industry		Direct
Pre-processing	Collected scrap	Sorted scrap	Size reduction	Dismantling		Manual	Often possible and desirable, especially for large products (e.g., cars)
				Shredding/comminution	Oversized materials are reduced to proper size for sorting. Scrap material is usually turn or cut into pieces.	Hammer mill shredders
			Size control	Screening	Material moving on a conveyor belt is fed onto a series of wire screens	Vibrating deck screens
						Roller screens
						Gyratory screens
						Cylindrical screens
				Separation	Gravity separation: Uses different weights of materials to separate them. Magnetic separation: Separates materials with different magnetic properties.	Jig concentrators	uses pulsating water currents
						Shaking tables	inclined surface with vibrations moves heavier particles to one side
						Spiral concentrators	Helical trough allows heavy minerals to move inward and lighter ones outward
						Dense media separation (DMS)	Uses a dense liquid (ferrofluid) where heavier minerals sink and lighter ones float
						Centrifugal concentrators	Uses spinning motion to enhance gravity effect, concentrating heavy minerals
						Dry/wet magnetic serrations
						High/low intensity magnetic separation
						Eddy current separation	Induce eddy current in conducting particle producing a magnetic field. To separate materials with high conductivity, such as Al
				Sorting	Sorting of material to have homogenous enough feed for the further processing.	Manual sorting	Continue to be a popular metho
						Dual X-ray transmission	Relatively new to increase the recovery of valuable materials
						Laser-induced breakdown spectroscopy	Relatively new to increase the recovery of valuable materials
not considered:
Exploration & Prospecting
Planning & Evaluation
Rehabilitation & Reclamation

## Sheet: Connection factors parameters
Factor category	Specific factor	Supply chain stage	Parameter	Iventory flows	Description
Economic	Commodity price	Market	#REF!	Input to market
		Market	#REF!	Input to market
		Mining, Concentration, Purification, Refining	Electricity source/mix	Energy input	Higher commodity prices allow higher enrgy consumption per concentrate
Economic	Extraction cost	Market	#REF!	Input to market
		Mining, Concentration, Purification, Refining	Electricity source/mix	Energy input	Lower extraction costs allow higher energy consumption per concentrate
Economic	RM demand	Market	RM demand	Reference flow
Economic	RM supply	Market	Collection rate	Input to market
		Market	#REF!	Input to market
		Mining, Concentration	#REF!	Ore output	Cumulative production decreases ore grade for some commodities
Economic	Recycling share	Market	Collection rate	Input to market
			#REF!	Input to market
Economic	Recycling cost	Market	#REF!	Input to market
Economic	Currency exchange rates
Economic	Supply chain disruptions
Environmental	Climate change
Environmental	Mining impacts
Legal	Mining legeslation
Legal	Climat change mitigation legeslation
Political	Climate policy	#REF!	#REF!
		#REF!	#REF!
		Concentration, Purification, Refining	Co-/by-products
Political	R&D policy
Political	Mining policy	#REF!	#REF!	Energy input	tbd: underground prefered in policy making due to lower environmental impacts?
Political	Recycling policy
Political	Trade policies & tariffs
Political	Geopolitical conflicts
Social	Climate change awareness
Social	Acceptance of mining
Social	Mining impacts
Social	Consumer behaviour
Technological	Substitutability
Technological	Recycling & circular economy innovations
Technological	Product material efficiency
Technological	Mining & extraction technologies	Mining	Strip ratio/ dilution
		#REF!	#REF!
		#REF!	#REF!
		#REF!	#REF!
		#REF!	#REF!
		#REF!	#REF!
		#REF!	#REF!
		Mining	Hauling fleet mix
		Purification, Refining	Product purity
		Mining, Concentration, Purification, Refining	Heat source/mix
		Mining, Concentration, Pre-treatment, Purification, Refining	Material efficiency improvement
		Mining, Concentration	Ore grade/Cut-off grade
		Mining	Other machinery fleet mix
		#REF!	#REF!
		#REF!	#REF!
		Mining, Concentration	Ore density/refractory
		Mining	Ore body shape
		Concentration	Mineralogy
		Mining	Mine type
		Mining	Mine depth
		Mining, Concentration, Purification, Refining	Mine - processing plant distances
		#REF!	#REF!
		Market	Primary production pathway share
		#REF!	#REF!
		Market	Primary production share
		#REF!	#REF!
		Market	Secondary production pathway share
		Market	Secondary production share
		Mining, Concentration, Pre-treatment, Purification, Refining	Technology switch
		Concentration	Concentrate grade
		#REF!	#REF!
		Mining, Concentration, Purification	Water circularity
		#REF!	#REF!
		#REF!	#REF!
		Concentration, Purification, Refining	Co-/by-products
		#REF!	#REF!
		#REF!	#REF!
		#REF!	#REF!
		#REF!	#REF!
		#REF!	#REF!
		#REF!	#REF!

## Sheet: Abbreviations
Abbreviation	Full
RM	Raw Material
URR	Ultimate Recoverable Resource
RMC	Resource to Mid-Century
SD	System Dynamics
dMFA	dynamic Material Flow Analysis
EoL-RIR	End of Life Recycling Input Rates
HPRG	High pressure grinding roll
VOD	Ventilation on demand
BAT	Best available technology
IT	Innovative technology
SotA	State of the Art
IAM	Integrated Assessment Model
RVO	Recycled Vegetable Oil
DRI	Direct Reduced Iron

## Sheet: References
References
ABB. “The Electric Mine Report 2024 - Mining Magazine and Australia’s Mining Monthly,” 2024. https://search.abb.com/library/Download.aspx?DocumentID=9AKK108469A8630.
Abhilash, and B. D. Pandey. 2013. Microbially assisted leaching of uranium—a review. Mineral Processing and Extractive Metallurgy Review 34 (2):81–113.
Adewuyi, Sefiu O., Hussin A. M. Ahmed, and Haitham M. A. Ahmed. “Methods of Ore Pretreatment for Comminution Energy Reduction.” Minerals 10, no. 5 (May 2020): 423. https://doi.org/10.3390/min10050423.
Ambrose, Hanjiro, and Alissa Kendall. “Understanding the Future of Lithium: Part 2, Temporally and Spatially Resolved Life-Cycle Assessment Modeling.” Journal of Industrial Ecology 24, no. 1 (2020): 90–100. https://doi.org/10.1111/jiec.12942.
Arcos, Felipe, and Lina Uribe. “Evaluation of the Use of Recycled Vegetable Oil as a Collector Reagent in the Flotation of Copper Sulfide Minerals Using Seawater.” Recycling 6, no. 1 (March 2021): 5. https://doi.org/10.3390/recycling6010005.
Asgari, Kaveh, Qingqing Huang, Rick Honaker, and Edward Sabolsky. “Investigating the Effect of Microwave Pretreatment on Bastnasite Grinding for Comminution Energy Reduction and Rare Earth Recovery.” Processes 12, no. 11 (November 2024): 2468. https://doi.org/10.3390/pr12112468.
Assis, Vinicius Moreira, Andréia Bicalho Henriques, Mariana Gazire Lemos, and Jose Augusto Dumont. “Technological Innovation in Córrego Do Sítio Mineração - A Study of Technical and Economic Aspects by Using Sensor-Based Sorting for Refractory Gold Ore.” REM - International Engineering Journal 74 (January 13, 2021): 117–25. https://doi.org/10.1590/0370-44672020740097.
Bao, Haiming, Peter Knights, Mehmet Kizil, and Micah Nehring. “Electrification Alternatives for Open Pit Mine Haulage.” Mining 3, no. 1 (March 2023): 1–25. https://doi.org/10.3390/mining3010001.
Batchelor, A. R., A. J. Buttress, D. A. Jones, J. Katrib, D. Way, T. Chenje, D. Stoll, C. Dodds, and S. W. Kingman. “Towards Large Scale Microwave Treatment of Ores: Part 2 – Metallurgical Testing.” Minerals Engineering 111 (September 1, 2017): 5–24. https://doi.org/10.1016/j.mineng.2017.05.003.
Bednarek, Patrycja S., Jan Zawala, and Przemyslaw B. Kowalczuk. “Polymer-Based Collectors in Flotation: A Review.” Advances in Colloid and Interface Science 335 (January 2025): 103351. https://doi.org/10.1016/j.cis.2024.103351.
Beylot, Antoine, Françoise Bodénan, Anne-Gwénaëlle Guezennec, and Stéphanie Muller. “LCA as a Support to More Sustainable Tailings Management: Critical Review, Lessons Learnt and Potential Way Forward.” Resources, Conservation and Recycling 183 (August 2022): 106347. https://doi.org/10.1016/j.resconrec.2022.106347.
BHP. “Operational Decarbonisation,” 2023. https://www.bhp.com/-/media/documents/media/reports-and-presentations/2023/230621_operationaldecarbonisationinvestorbriefing.pdf.
Binnemans, Koen, and Peter Tom Jones. “The Twelve Principles of Circular Hydrometallurgy.” Journal of Sustainable Metallurgy 9, no. 1 (March 1, 2023): 1–25. https://doi.org/10.1007/s40831-022-00636-3.
Calderon, J.L., N.M. Smith, M.D. Bazilian, and E. Holley. “Critical Mineral Demand Estimates for Low-Carbon Technologies: What Do They Tell Us and How Can They Evolve?” Renewable and Sustainable Energy Reviews 189 (January 2024): 113938. https://doi.org/10.1016/j.rser.2023.113938.
Calvo, Guiomar, Gavin Mudd, Alicia Valero, and Antonio Valero. “Decreasing Ore Grades in Global Metallic Mining: A Theoretical Issue or a Global Reality?” Resources 5, no. 4 (December 2016): 36. https://doi.org/10.3390/resources5040036.
Charpentier Poncelet, Alexandre, Christoph Helbig, Philippe Loubet, Antoine Beylot, Stéphanie Muller, Jacques Villeneuve, Bertrand Laratte, Andrea Thorenz, Axel Tuma, and Guido Sonnemann. “Losses and Lifetimes of Metals in the Economy.” Nature Sustainability 5, no. 8 (August 2022): 717–26. https://doi.org/10.1038/s41893-022-00895-8.
Crowson, Phillip. “Some Observations on Copper Yields and Ore Grades.” Resources Policy 37, no. 1 (March 1, 2012): 59–72. https://doi.org/10.1016/j.resourpol.2011.12.004.
De Lima, João Pedro Machado, Miriam Cristina Santos Amaral, and Sonaly Cristina Rezende Borges De Lima. “Sustainable Water Management in the Mining Industry: Paving the Way for the Future.” Journal of Water Process Engineering 71 (March 2025): 107239. https://doi.org/10.1016/j.jwpe.2025.107239.
Deetman, Sebastiaan, Stefan Pauliuk, Detlef P. van Vuuren, Ester van der Voet, and Arnold Tukker. “Scenarios for Demand Growth of Metals in Electricity Generation Technologies, Cars, and Electronic Appliances.” Environmental Science & Technology 52, no. 8 (April 17, 2018): 4950–59. https://doi.org/10.1021/acs.est.7b05549.
Dehoust, Günter, Andreas Manhart, Peter Dolega, Regine Vogt, Claudia Kemper, Andreas Auberger, Fiona Becker, Christina Scholl, Aissa Rechlin, and Michael Priester. “Environmental Ciritcality or Raw Materials,” 2020. https://www.umweltbundesamt.de/sites/default/files/medien/1410/publikationen/2020-06-17_texte_80-2020_oekoressii_environmentalcriticality-report_.pdf.
Dong, Di, Lauran Van Oers, Arnold Tukker, and Ester Van Der Voet. “Assessing the Future Environmental Impacts of Copper Production in China: Implications of the Energy Transition.” Journal of Cleaner Production 274 (November 2020): 122825. https://doi.org/10.1016/j.jclepro.2020.122825.
Dunbar, W. Scott. How Mining Works. Society for Mining, Metallurgy & Exploration Inc., 2016.
Eckelman, Matthew J. “Facility-Level Energy and Greenhouse Gas Life-Cycle Assessment of the Global Nickel Industry.” Resources, Conservation and Recycling 54, no. 4 (February 2010): 256–66. https://doi.org/10.1016/j.resconrec.2009.08.008.
Elshkaki, Ayman, and T.E. Graedel. “Dynamic Analysis of the Global Metals Flows and Stocks in Electricity Generation Technologies.” Journal of Cleaner Production 59 (November 2013): 260–73. https://doi.org/10.1016/j.jclepro.2013.07.003.
Elshkaki, Ayman, Barbara K. Reck, and T.E. Graedel. “Anthropogenic Nickel Supply, Demand, and Associated Energy and Water Use.” Resources, Conservation and Recycling 125 (October 2017): 300–307. https://doi.org/10.1016/j.resconrec.2017.07.002.
Elshkaki, Ayman, T. E. Graedel, Luca Ciacci, and Barbara K. Reck. “Resource Demand Scenarios for the Major Metals.” Environmental Science & Technology 52, no. 5 (March 6, 2018): 2491–97. https://doi.org/10.1021/acs.est.7b05154.
Elshkaki, Ayman, T.E. Graedel, Luca Ciacci, and Barbara K. Reck. “Copper Demand, Supply, and Associated Energy Use to 2050.” Global Environmental Change 39 (July 2016): 305–15. https://doi.org/10.1016/j.gloenvcha.2016.06.006.
Engels, Philipp, Felipe Cerdas, Tina Dettmer, Christoph Frey, Jan Hentschel, Christoph Herrmann, Tina Mirfabrikikar, and Maximilian Schueler. “Life Cycle Assessment of Natural Graphite Production for Lithium-Ion Battery Anodes Based on Industrial Primary Data.” Journal of Cleaner Production 336 (February 2022): 130474. https://doi.org/10.1016/j.jclepro.2022.130474.
Gleeson, Daniel. “Future Mining Equipment Demand and a Move to Electric Power.” International Mining, 2018. https://im-mining.com/2018/12/10/future-mining-equipment-demand-move-electric-power/.
GlobalData. “Mine-Site Technology Adoption Survey, 2024 Update.” Market Research Reports & Consulting | GlobalData UK Ltd. (blog), 2024. https://www.globaldata.com/store/report/mine-site-technology-adoption-survey-analysis/.
Harpprecht, Carina, Brenda Miranda Xicotencatl, Sander van Nielen, Marc van der Meide, Chen Li, Zhijie Li, Arnold Tukker, and Bernhard Steubing. “Future Environmental Impacts of Metals: A Systematic Review of Impact Trends, Modelling Approaches, and Challenges.” Resources, Conservation and Recycling 205 (June 1, 2024): 107572. https://doi.org/10.1016/j.resconrec.2024.107572.
Harpprecht, Carina, Lauran van Oers, Stephen A. Northey, Yongxiang Yang, and Bernhard Steubing. “Environmental Impacts of Key Metals’ Supply and Low-Carbon Technologies Are Likely to Decrease in the Future.” Journal of Industrial Ecology 25, no. 6 (2021): 1543–59. https://doi.org/10.1111/jiec.13181.
IEA. Global Critical Minerals Outlook 2024. 2024. https://www.iea.org/reports/global-critical-minerals-outlook-2024.
IEA. “Iron and Steel Technology Roadmap – Analysis.” IEA, October 8, 2020. https://www.iea.org/reports/iron-and-steel-technology-roadmap.
Istrate, Robert, Aina Mas-Fons, Antoine Beylot, Stephen Northey, Ketan Vaidya, Guido Sonnemann, René Kleijn, and Bernhard Steubing. “Decarbonizing Lithium-Ion Battery Primary Raw Materials Supply Chain.” Joule 8, no. 11 (November 20, 2024): 2992–3016. https://doi.org/10.1016/j.joule.2024.10.003.
Jankovic, A., C. Ozer, W. Valery, and K. Duffy. “Evaluation of HPGR and VRM for Dry Comminution of Mineral Ores.” Journal of Mining and Metallurgy A: Mining 52, no. 1 (2016): 11–25. https://doi.org/10.5937/JMMA1601011J.
José, Dimas, Maurício Guimaraes Bergerman, Aaron Samuel Young, and Carlos Otávio Petter. “Pre-Concentration Potential Evaluation for a Silicate Zinc Ore by Density and Sensor-Based Sorting Methods.” REM - International Engineering Journal 72 (June 2019): 335–43. https://doi.org/10.1590/0370-44672018720155.
Khakmardan, Shayan, Robert H. Crawford, Damien Giurco, and Wen Li. “Constructing a Life Cycle Inventory of Spodumene Concentrate Production: Greenbushes Case, Western Australia.” Journal of Cleaner Production, February 2025, 145123. https://doi.org/10.1016/j.jclepro.2025.145123.
Koizhanova, Aigul, David Magomedov, Nurgali Abdyldayev, Maria Yerdenova, and Akbota Bakrayeva. “The Effect of Biochemical Oxidation on the Hydrometallurgical Production of Copper.” Teknomekanik 6, no. 1 (June 1, 2023): 12–20. https://doi.org/10.24036/teknomekanik.v6i1.16072.
Koppelaar, R. H. E. M., and H. Koppelaar. “The Ore Grade and Depth Influence on Copper Energy Inputs.” BioPhysical Economics and Resource Quality 1, no. 2 (November 22, 2016): 11. https://doi.org/10.1007/s41247-016-0012-x.
Koroma, Michael Samsu, Nils Brown, Giuseppe Cardellini, and Maarten Messagie. “Prospective Environmental Impacts of Passenger Cars under Different Energy and Steel Production Scenarios.” Energies 13, no. 23 (January 2020): 6236. https://doi.org/10.3390/en13236236.
Kuipers, Koen J. J., Lauran F. C. M. van Oers, Miranda Verboon, and Ester van der Voet. “Assessing Environmental Implications Associated with Global Copper Demand and Supply Scenarios from 2010 to 2050.” Global Environmental Change 49 (March 1, 2018): 106–15. https://doi.org/10.1016/j.gloenvcha.2018.02.008.
Kulczycka, Joanna, Łukasz Lelek, Anna Lewandowska, Herbert Wirth, and Joseph D. Bergesen. “Environmental Impacts of Energy-Efficient Pyrometallurgical Copper Smelting Technologies: The Consequences of Technological Changes from 2010 to 2050.” Journal of Industrial Ecology 20, no. 2 (2016): 304–16. https://doi.org/10.1111/jiec.12369.
Kumar Katta, Anil, Matthew Davis, and Amit Kumar. “Assessment of Greenhouse Gas Mitigation Options for the Iron, Gold, and Potash Mining Sectors.” Journal of Cleaner Production 245 (February 2020): 118718. https://doi.org/10.1016/j.jclepro.2019.118718.
Langkau, Sabine, and Luis A. Tercero Espinoza. “Technological Change and Metal Demand over Time: What Can We Learn from the Past?” Sustainable Materials and Technologies 16 (July 2018): 54–59. https://doi.org/10.1016/j.susmat.2018.02.001.
Langkau, Sabine, and Martin Erdmann. “Environmental Impacts of the Future Supply of Rare Earths for Magnet Applications.” Journal of Industrial Ecology 25, no. 4 (2021): 1034–50. https://doi.org/10.1111/jiec.13090.
Lastra, German, Vladimir Jokovic, and Sarma Kanchibotla. “Understanding the Impact of Geotechnical Ore Properties and Blast Design on Comminution Circuits Using Simulations.” Minerals Engineering 170 (August 15, 2021): 107001. https://doi.org/10.1016/j.mineng.2021.107001.
Li, Qiang, Wenjuan Zhang, Huiquan Li, and Peng He. “CO 2 Emission Trends of China’s Primary Aluminum Industry: A Scenario Analysis Using System Dynamics Model.” Energy Policy 105 (June 2017): 225–35. https://doi.org/10.1016/j.enpol.2017.02.046.
Li, Xuexian, Qinghua Gu, Qian Wang, Jiale Luo, Di Liu, and Yu Chang. “Renewable Energy in the Mining Industry: Status, Opportunities and Challenges.” Energy Strategy Reviews 56 (November 2024): 101597. https://doi.org/10.1016/j.esr.2024.101597.
Lyashenko, V. I., V. I. Golik, and R. V. Klyuev. “Evaluation of the Efficiency and Environmental Impact (on Subsoil and Groundwater) of Underground Block Leaching (UBL) of Metals from Ores.” Mining Science and Technology (Russia) 7, no. 1 (April 12, 2022): 5–17. https://doi.org/10.17073/2500-0632-2022-1-5-17.
Madeddu, Silvia, Falko Ueckerdt, Michaja Pehl, Juergen Peterseim, Michael Lord, Karthik Ajith Kumar, Christoph Krüger, and Gunnar Luderer. “The CO2 Reduction Potential for the European Industry via Direct Electrification of Heat Supply (Power-to-Heat).” Environmental Research Letters 15, no. 12 (November 2020): 124004. https://doi.org/10.1088/1748-9326/abbd02.
Marscheider-Weidemann, Frank, Torsten Hummen, Lorenz Erdmann, Luis Alberto Tercero Espinoza, Gerhard Angerer, Max Marwede, Stephan Benecke, and Fraunhofer-Institut für Zuverlässigkeit und Mikrointegration. Rohstoffe für Zukunftstechnologien 2016: Auftragsstudie. DERA Rohstoffinformationen 28. Hannover: DERA researched by Fraunhofer-Institut für System- und Innovationsforschung, 2016.
McKinley, Caitlyn, and Ahmad Ghahreman. “Hydrochloric Acid Regeneration in Hydrometallurgical Processes: A Review.” Mineral Processing and Extractive Metallurgy 127, no. 3 (September 1, 2018): 157–68. https://doi.org/10.1080/03719553.2017.1330839.
Memary, Reza, Damien Giurco, Gavin Mudd, and Leah Mason. “Life Cycle Assessment: A Time-Series Analysis of Copper.” Journal of Cleaner Production 33 (September 2012): 97–108. https://doi.org/10.1016/j.jclepro.2012.04.025.
Mishra, Srabani, Panda ,Sandeep, Akcil ,Ata, and Seydou and Dembele. “Biotechnological Avenues in Mineral Processing: Fundamentals, Applications and Advances in Bioleaching and Bio-Beneficiation.” Mineral Processing and Extractive Metallurgy Review 44, no. 1 (January 2, 2023): 22–51. https://doi.org/10.1080/08827508.2021.1998043.
Mishra, Srabani, Panda ,Sandeep, Akcil ,Ata, and Seydou and Dembele. “Biotechnological Avenues in Mineral Processing: Fundamentals, Applications and Advances in Bioleaching and Bio-Beneficiation.” Mineral Processing and Extractive Metallurgy Review 44, no. 1 (January 2, 2023): 22–51. https://doi.org/10.1080/08827508.2021.1998043.
Moya, J. A., A. Boulamati, S. Slingerland, R. van der Veen, M. Gancheva, K. M. Rademaekers, J. J. P. Kuenen, and A. J. H. Visschedijk. Energy Efficiency and GHG Emissions: Prospective Scenarios for the Aluminium Industry. Publications Office of the European Union, 2015. https://data.europa.eu/doi/10.2790/263787.
Mudd, Gavin M. “The Environmental Sustainability of Mining in Australia: Key Mega-Trends and Looming Constraints.” Resources Policy 35, no. 2 (June 2010): 98–115. https://doi.org/10.1016/j.resourpol.2009.12.001.
Mudd, Gavin M., and Simon M. Jowitt. “A Detailed Assessment of Global Nickel Resource Trends and Endowments.” Economic Geology 109, no. 7 (November 1, 2014): 1813–41. https://doi.org/10.2113/econgeo.109.7.1813.
Mudd, Gavin M., Simon M. Jowitt, and Timothy T. Werner. “The World’s Lead-Zinc Mineral Resources: Scarcity, Data, Issues and Opportunities.” Ore Geology Reviews 80 (January 2017): 1160–90. https://doi.org/10.1016/j.oregeorev.2016.08.010.
Mudd, Gavin M., Zhehan Weng, and Simon M. Jowitt. “A Detailed Assessment of Global Cu Resource Trends and Endowments*.” Economic Geology 108, no. 5 (August 1, 2013): 1163–83. https://doi.org/10.2113/econgeo.108.5.1163.
Nassar, Nedal T., Graham W. Lederer, Jamie L. Brainard, Abraham J. Padilla, and Joseph D. Lessard. “Rock-to-Metal Ratio: A Foundational Metric for Understanding Mine Wastes.” Environmental Science & Technology 56, no. 10 (May 17, 2022): 6710–21. https://doi.org/10.1021/acs.est.1c07875.
Nkwanyana, Sandile, and Brian Loveday. “Addition of Pebbles to a Ball-Mill to Improve Grinding Efficiency.” Minerals Engineering, SI: Comminution ’16, 103–104 (April 1, 2017): 72–77. https://doi.org/10.1016/j.mineng.2016.09.004.
Norgate, Terry, and Sharif Jahanshahi. “Reducing the Greenhouse Gas Footprint of Primary Metal Production: Where Should the Focus Be?” Minerals Engineering 24, no. 14 (November 2011): 1563–70. https://doi.org/10.1016/j.mineng.2011.08.007.
Northey, S., N. Haque, and G. Mudd. “Using Sustainability Reporting to Assess the Environmental Footprint of Copper Mining.” Journal of Cleaner Production, Special Volume: Sustainable consumption and production for Asia: Sustainability through green design and practice, 40 (February 1, 2013): 118–28. https://doi.org/10.1016/j.jclepro.2012.09.027.
Northey, S., S. Mohr, G.M. Mudd, Z. Weng, and D. Giurco. “Modelling Future Copper Ore Grade Decline Based on a Detailed Assessment of Copper Resources and Mining.” Resources, Conservation and Recycling 83 (February 2014): 190–201. https://doi.org/10.1016/j.resconrec.2013.10.005.
Northey, S.A., S. Klose, S. Pauliuk, M. Yellishetty, and D. Giurco. “Primary Exploration, Mining and Metal Supply Scenario (PEMMSS) Model: Towards a Stochastic Understanding of the Mineral Discovery, Mine Development and Co-Product Recovery Requirements to Meet Demand in a Low-Carbon Future.” Resources, Conservation & Recycling Advances 17 (May 2023): 200137. https://doi.org/10.1016/j.rcradv.2023…
Northey, Stephen A., Gavin M. Mudd, and T. T. Werner. “Unresolved Complexity in Assessments of Mineral Resource Depletion and Availability.” Natural Resources Research 27, no. 2 (April 1, 2018): 241–55. https://doi.org/10.1007/s11053-017-9352-5.
Northey, Stephen A., Gavin M. Mudd, and T. T. Werner. “Unresolved Complexity in Assessments of Mineral Resource Depletion and Availability.” Natural Resources Research 27, no. 2 (April 1, 2018): 241–55. https://doi.org/10.1007/s11053-017-9352-5.
Peppas, A., C. Politi, E. Pantazakou, and D. Skenderas. “New Generation of Ecofriendly Reagents Based on Organosolv Lignin Nanoparticles: Environmental Assessment for an Au Flotation Circuit.” Journal of Mining and Metallurgy A: Mining 60, no. 1 (2024): 33–40. https://doi.org/10.5937/JMMA2401033P.
Poncelet, Alexandre Charpentier, Christoph Helbig, Philippe Loubet, Antoine Beylot, Stéphanie Muller, Jacques Villeneuve, Bertrand Laratte, Andrea Thorenz, Axel Tuma, and Guido Sonnemann. “Losses and Lifetimes of Metals in the Economy.” Nature Sustainability 5, no. 8 (August 2022): 717–26. https://doi.org/10.1038/s41893-022-00895-8.
Sacchi, R., T. Terlouw, K. Siala, A. Dirnaichner, C. Bauer, B. Cox, C. Mutel, V. Daioglou, and G. Luderer. “PRospective EnvironMental Impact asSEment (Premise): A Streamlined Approach to Producing Databases for Prospective Life Cycle Assessment Using Integrated Assessment Models.” Renewable and Sustainable Energy Reviews 160 (May 1, 2022): 112311. https://doi.org/10.1016/j.rser.2022.112311.
Şahbaz, Oktay, Ali Uçar, Çağrı Emer, and Cengiz Karagüzel. “Advanced Techniques on Fine and Coarse Particle Flotation.” In Advances in Minerals Research, edited by Shadia Jamil Ikhmayies, 55–76. Cham: Springer Nature Switzerland, 2024. https://doi.org/10.1007/978-3-031-49175-7_3.
Sapsford, D. J., R. A. Crane, and D. Sinnett. “An Exploration of Key Concepts in Application of In Situ Processes for Recovery of Resources from High-Volume Industrial and Mine Wastes,” 2019. https://books.rsc.org/books/edited-volume/786/chapter/519993/An-Exploration-of-Key-Concepts-in-Application-of.
Saramak, Daniel. “Optimizing the Performance of High-Pressure Grinding Roll Based Ore Enrichment Circuits.” Gospodarka Surowcami Mineralnymi - Mineral Resources Management; 2012; Vol. 28; No 4; 87-99, 2012. https://journals.pan.pl/dlibra/publication/99455/edition/85752.
Schneider, E., B. Carlsen, E. Tavrides, C. Van Der Hoeven, and U. Phathanapirom. “A Top-down Assessment of Energy, Water and Land Use in Uranium Mining, Milling, and Refining.” Energy Economics 40 (November 2013): 911–26. https://doi.org/10.1016/j.eneco.2013.08.006.
SCREEN project. “Report on the Future Use of Critical Raw Materials,” 2016. https://publica-rest.fraunhofer.de/server/api/core/bitstreams/4d608185-71b6-4ca6-a27b-19b6660fe1c6/content.
Van der Voet, Ester, Lauran Van Oers, Miranda Verboon, and Koen Kuipers. “Environmental Implications of Future Demand Scenarios for Metals: Methodology and Application to the Case of Seven Major Metals.” Journal of Industrial Ecology 23, no. 1 (2019): 141–55. https://doi.org/10.1111/jiec.12722.
Watari, Takuma, Stephen Northey, Damien Giurco, Sho Hata, Ryosuke Yokoi, Keisuke Nansai, and Kenichi Nakajima. “Global Copper Cycles and Greenhouse Gas Emissions in a 1.5 °C World.” Resources, Conservation and Recycling 179 (April 2022): 106118. https://doi.org/10.1016/j.resconrec.2021.106118.
Weng, Zhehan, Nawshad Haque, Gavin M. Mudd, and Simon M. Jowitt. “Assessing the Energy Requirements and Global Warming Potential of the Production of Rare Earth Elements.” Journal of Cleaner Production 139 (December 2016): 1282–97. https://doi.org/10.1016/j.jclepro.2016.08.132.
Yunita, F. E., and M. Z. Mubarok. “Nickel Leaching from Laterite Ores by Combination of Organic and Sulfuric Acid.” AIP Conference Proceedings 2382, no. 1 (August 10, 2021): 050003. https://doi.org/10.1063/5.0060750.
Zhang, Yan, Mingyao Cui, Jianguo Wang, Xiaoliang Liu, and Xianjun Lyu. “A Review of Gold Extraction Using Alternatives to Cyanide: Focus on Current Status and Future Prospects of the Novel Eco-Friendly Synthetic Gold Lixiviants.” Minerals Engineering 176 (January 2022): 107336. https://doi.org/10.1016/j.mineng.2021.107336.
Zhong, Xiaoyang, Mingming Hu, Sebastiaan Deetman, Bernhard Steubing, Hai Xiang Lin, Glenn Aguilar Hernandez, Carina Harpprecht, Chunbo Zhang, Arnold Tukker, and Paul Behrens. “Global Greenhouse Gas Emissions from Residential and Commercial Building Materials and Mitigation Strategies to 2060.” Nature Communications 12, no. 1 (October 21, 2021): 6126. https://doi.org/10.1038/s41467-021-26212-z.
Roberto, Francisco F., and Axel Schippers. “Progress in Bioleaching: Part B, Applications of Microbial Processes by the Minerals Industries.” Applied Microbiology and Biotechnology 106, no. 18 (September 1, 2022): 5913–28. https://doi.org/10.1007/s00253-022-12085-9.
Gaines, Linda, Jingyi Zhang, Xin He, Jessey Bouchard, and Hans Eric Melin. “Tracking Flows of End-of-Life Battery Materials and Manufacturing Scrap.” Batteries 9, no. 7 (July 2023): 360. https://doi.org/10.3390/batteries9070360.
Flues, Florens, Dirk T. G. Rübbelke, and Stefan Vögele. “Energy Efficiency and Industrial Output: The Case of the Iron and Steel Industry.” SSRN Scholarly Paper. Rochester, NY: Social Science Research Network, December 3, 2013. https://doi.org/10.2139/ssrn.2362797.
Schleich, Joachim. “Determinants of Structural Change and Innovation in the German Steel Industry an Empirical Investigation.” International Journal of Public Policy 2, no. 1/2 (2007): 109. https://doi.org/10.1504/IJPP.2007.012278.
Aksoy, Derya Öz, Özdemir ,Serhat, Aytar Çelik ,Pınar, Koca ,Sabiha, Çabuk ,Ahmet, Koca ,Hüseyin, and Pablo and Brito-Parada. “Fusion of the Microbial World into the Flotation Process.” Mineral Processing and Extractive Metallurgy Review 43, no. 8 (November 17, 2022): 1068–82. https://doi.org/10.1080/08827508.2021.2023518.
European Parlament. “Regulation (EU) 2023/ of the European Parliament and of the Council of 12 July 2023 Concerning Batteries and Waste Batteries, Amending Directive 2008/98/EC and Regulation (EU) 2019/1020 and Repealing Directive 2006/66/EC,” 2023.
Yang, Hang, Wei Feng, Hongli Diao, and Shibin Xia. “Artificial Intelligence Transforming Minerals Engineering: Key Trends in Literature and Applications.” Minerals Engineering 234 (December 2025): 109741. https://doi.org/10.1016/j.mineng.2025.109741.
Norgate, T.E., S. Jahanshahi, and W.J. Rankin. “Assessing the Environmental Impact of Metal Production Processes.” Journal of Cleaner Production 15, no. 8–9 (January 2007): 838–48. https://doi.org/10.1016/j.jclepro.2006.06.018.
Dunbar, W. Scott. How Mining Works. Society for Mining, Metallurgy & Exploration Inc., 2016.
Nuss, Philip, and Matthew J. Eckelman. “Life Cycle Assessment of Metals: A Scientific Synthesis.” PLOS ONE 9, no. 7 (July 7, 2014): e101298. https://doi.org/10.1371/journal.pone.0101298.
Segura-Salazar, Juliana, Francisco Mariano Lima, and Luís Marcelo Tavares. “Life Cycle Assessment in the Minerals Industry: Current Practice, Harmonization Efforts, and Potential Improvement through the Integration with Process Simulation.” Journal of Cleaner Production 232 (September 20, 2019): 174–92. https://doi.org/10.1016/j.jclepro.2019.05.318.
Dunne, Robert C., Kwatra, S. Komar, Young, Courtney A. (2019). SME - Mineral Processing & Extractive Metallurgy Handbook. Society for Mining, Metallugry & Exploration.
Wills, Barry A., and James A. Finch, eds. “Wills’ Mineral Processing Technology.” In Wills’ Mineral Processing Technology (Eighth Edition). Butterworth-Heinemann, 2016. https://doi.org/10.1016/B978-0-08-097053-0.00018-2.
Metso. “Basics in Minerals Processing Handbook.” Metso, 2011. https://www.metso.com/insights/e-books/basics-in-minerals-processing-handbook/.
Engh, Thorvald Abel, Geoffrey K. Sigworth, and Anne Kvithyld, eds. “Principles of Metal Refining and Recycling.” In Principles of Metal Refining and Recycling. Oxford University Press, 2021. https://doi.org/10.1093/oso/9780198811923.002.0004.
Zhang, Chengyi, Wen Zhang, and Yuxin Wang. “Diffusion Dialysis for Acid Recovery from Acidic Waste Solutions: Anion Exchange Membranes and Technology Integration.” Membranes 10, no. 8 (2020): 169. https://doi.org/10.3390/membranes10080169.
Rezende Moreira, Victor, Yuri Abner Rocha Lebron, Débora Gontijo, and Míriam Cristina Santos Amaral. “Membrane Distillation and Dispersive Solvent Extraction in a Closed-Loop Process for Water, Sulfuric Acid and Copper Recycling from Gold Mining Wastewater.” Chemical Engineering Journal 435 (May 2022): 133874. https://doi.org/10.1016/j.cej.2021.133874.
ABB. “Mining Moment Report.” News, October 28, 2024. https://new.abb.com/news/detail/120642/abb-study-reveals-70-percent-of-mining-leaders-believe-significant-decarbonisation-can-be-achieved-with-existing-technologies.
Antonini, Stefano, Giulia Grisolia, and Gian Andrea Blengini. “Three Open Questions on Net Zero in the Mining and Metals Industries.” Mineral Economics, ahead of print, November 17, 2025. https://doi.org/10.1007/s13563-025-00554-2.
